# Supplementary material for: Organic matters, but inorganic matters too: column examination of elevated mercury sorption on low organic matter aquifer material using concentrations and stable isotope ratios
Source: Copernicus journal article supplement (doi:10.5194/soil-10-77-2024), 2024-02-01
Supplement: Supplementary file 1 [file soil-10-77-2024-supplement.pdf]

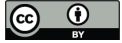

*Supplement of*

**Organic matters, but inorganic matters too: column examination of elevated mercury sorption on low organic matter aquifer material using concentrations and stable isotope ratios**

**David S. McLagan et al.**

*Correspondence to:* David S. McLagan ([david.mclagan@queensu.ca](mailto:david.mclagan@queensu.ca))

The copyright of individual parts of the supplement might differ from the article licence.

## **Table of Contents**

|                                                                                                                           |    |
|---------------------------------------------------------------------------------------------------------------------------|----|
| S1. Preliminary experiments & column packing. ....                                                                        | 2  |
| S2. Properties of solid- and liquid-phase materials used in column experiments. ....                                      | 9  |
| S3. Sorbed quantities of Hg in column experiments. ....                                                                   | 12 |
| S4. Liquid-phase speciation analyses.....                                                                                 | 13 |
| S5. Liquid-phase THg concentrations over time across all columns .....                                                    | 21 |
| S6. Model fitting for liquid-phase sorption and desorption curves. ....                                                   | 23 |
| S7. Liquid-phase stable isotope data.....                                                                                 | 24 |
| S8. Hg stable isotope, THg concentration & moisture content data for solid-phase materials including column sections..... | 25 |
| S9. Pyrolytic Thermal Desorption (PTD) curves for solid-phase speciation analyses.....                                    | 27 |
| S10. Modelling estimation of liquid-phase Hg speciation using Visual MINTEQ v3.1 .....                                    | 32 |
| References:.....                                                                                                          | 34 |

# S1. Preliminary experiments & column packing.

## Packing Methods

All packing methods utilised glass beads and quartz wool below and above the solid-phase materials to minimise material and particle transport (see Figure 1 of main paper). The outlet for the liquid was located in or above the quartz wool. The plunger of the syringe was placed as a mechanical barrier on top of the syringe to prevent the layers from slipping. Finally, tubing was attached to the outlet (just below the plunger) to transport eluate away from the column. This tubing was glued from the outside to prevent leaks.

## Filling with dried material and layer-by-layer flooding of the column

Layers of  $\approx 18$  g of aquifer material were added layer by layer into the column and then dry compacted before flooding each layer from below. The 18.09 g of the initial layer of material could be compressed to a volume of about  $11 \text{ cm}^3$ , resulting in a bulk density of  $1.64 \text{ g/cm}^3$ . To further compact the layers and remove trapped air bubbles, the first layer was flooded from the bottom and the water was drained. To ensure hydraulic connection between the layers, the surface was scratched and lightly loosened. The second layer, consisting of another 18.03 g, was then added and compressed to a volume of  $11 \text{ cm}^3$ . After flooding the column again from the bottom, the two layers separated from each other. Attempting to reassemble the layers was unsuccessful, thus this packing method experiment was terminated.

## Dry packing of the column

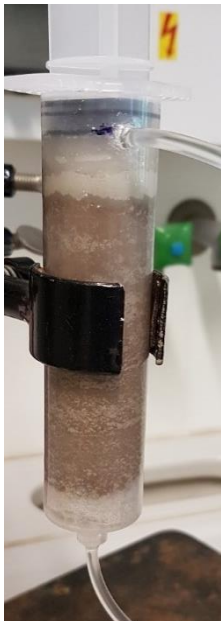

Figure S1.1: dry packed soil column

The next method involved the addition of layers of  $\approx 16$  g of aquifer material were added. 16.03 g of the first layer added could be compressed to a volume of  $11.5 \text{ cm}^3$ , resulting in a storage density of  $1.39 \text{ g/cm}^3$ . The surface of the layer was then slightly loosened to achieve hydraulic connection between the layers. After flooding the entire column, some small pockets were observed (Figure S1.1). Therefore, another packing method was considered.

## Packing the column with 7 wt.% water

In this method, the sieved aquifer material was mixed with 7 wt.% tap water to avoid gradation of the material during filling and to prevent possible air inclusions. The lower structure of the column S2 is identical to the first and second packing experiments. For every  $9\text{-}10 \text{ cm}^3$ , a dry mass of about 15 g was filled. The surface of each layer was loosened again to ensure a better connection between the layers. A bulk density of  $1.56 \text{ g/cm}^3$  was achieved.

The distribution of the material appeared more even and fewer air inclusions were visible compared to the second packing experiment.

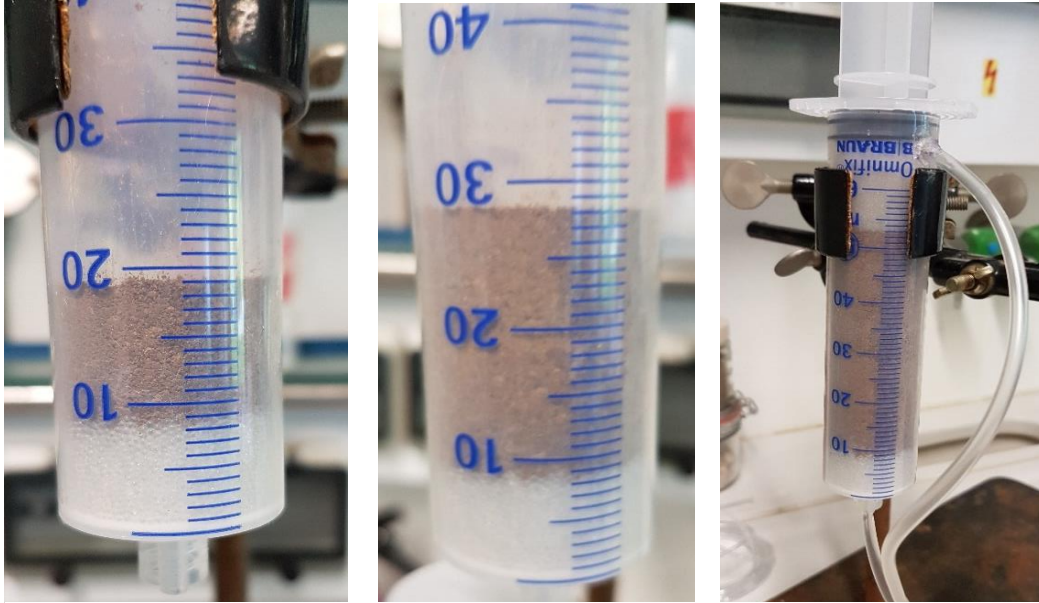

Figure S1.2: Presentation of the layered introduction of the material mixed with 7% water

### Preliminary flow-through column experiments

Three columns using 7% water volume and one column dry packed were tested under flow conditions. These columns were flushed with tap water for one week prior to the start of the preliminary test. During the testing phase, there was separation of the lower layers in columns S2 to S4 (Figure S1.3), indicating that this occurred in columns with higher bulk density and 7% water addition. S1 did not have this problem and showed similar results to the other columns in the preliminary test, which led to the decision to use the drying packing method for actual experiments (EXP1 and EXP2).

Table S1.1: Summary of the setup of the pre-test columns S1 to S4.

|           | <i>Dry mass</i><br>[g] | <i>Volume</i><br>[cm <sup>3</sup> ] | <i>Bulk density</i><br>[g/cm <sup>3</sup> ] | <i>Packing Methode</i> |
|-----------|------------------------|-------------------------------------|---------------------------------------------|------------------------|
| <b>S1</b> | 72.21                  | 51.00                               | 1.42                                        | Dry packing            |
| <b>S2</b> | 67.10                  | 43.50                               | 1.54                                        | With 7 % water         |
| <b>S3</b> | 74.34                  | 49.25                               | 1.51                                        | With 7 % water         |
| <b>S4</b> | 74.42                  | 47.00                               | 1.58                                        | With 7 % water         |

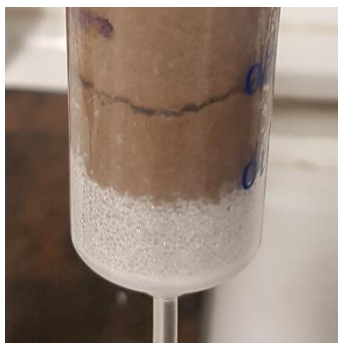

Figure S1.3: Example of layer separation during the flushing process using the 7% water packing method.

### **Background Investigations**

Upon connecting the first columns, discoloration of the eluate was observed (see Figure S1.4). This slight yellowish to brownish discoloration decreased with increasing water flow. Filtering the fluid with a 0.45  $\mu\text{m}$  nylon syringe filter did not change the coloration. Subsequently, the fresh eluate was analysed for dissolved organic carbon (DOC) and other constituents immediately after connecting the column to the system and after a 24-hour flushing period. Table S2.2 (in Section S2 below) shows the DOC and other constituents of the two solutions. The origin of the DOC was somewhat surprising, as the determination of organic material showed a low value of only  $0.16 \pm 0.02\%$ . Additionally, the syringe, glass beads, and quartz wool were tested for DOC in separate experiments to investigate their origin. DOC measurements from these deionised water leaches (after initial rinsing all equipment with deionised water) were below limits of detection. This confirmed our decision to allow the columns to equilibrate for 7 days, flowing with tap water.

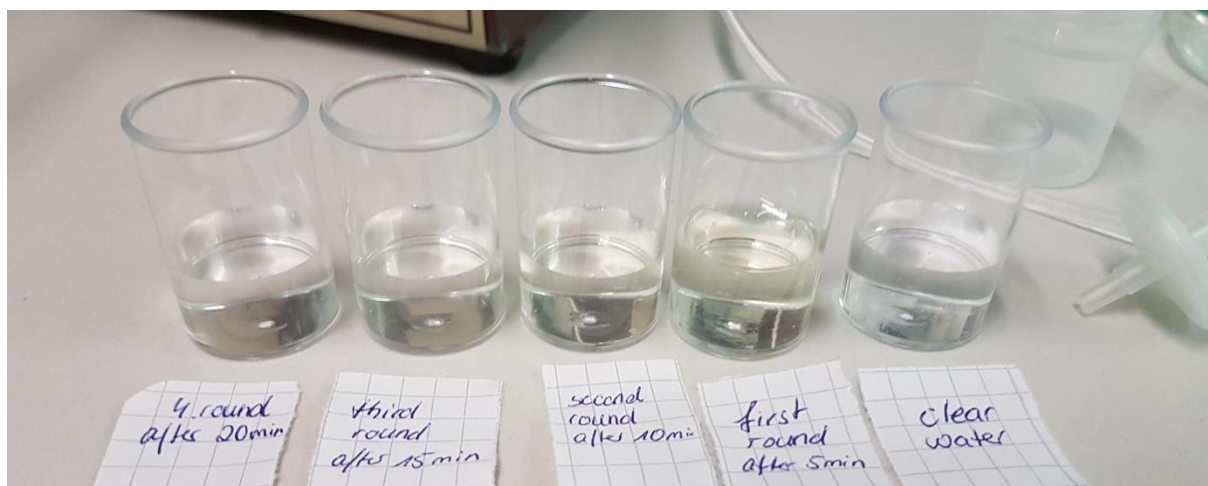

Figure S1.4. Coloration of the eluate after the start of the column experiment at 5 min, 10 min, 15 min, and after 20 min.

## Tracer experiments

In order to test the usability of the chloride tracer, theoretical calculations for the required time of the water front were made and real-time measurements (stop watch) were taken during preliminary experiments on column S4 listed above (as listed above). For the theoretical calculations, the volumes were determined based on the lengths and diameters of the hoses, and a range between 0.2 and 0.4 effective porosity was assumed based on the bulk density of  $1.58 \text{ g/cm}^3$ . The volumetric flow rate to be set via the pump was determined in advance with a measuring cylinder and stopwatch and averaged  $1.17 \text{ ml min}^{-1}$  for S4. Based on these assumed effective porosities, a flow-through time of 12.8 min to 25.7 min was calculated for the column. Timed measurements determined the water front to pass through the column in 16.1 min .

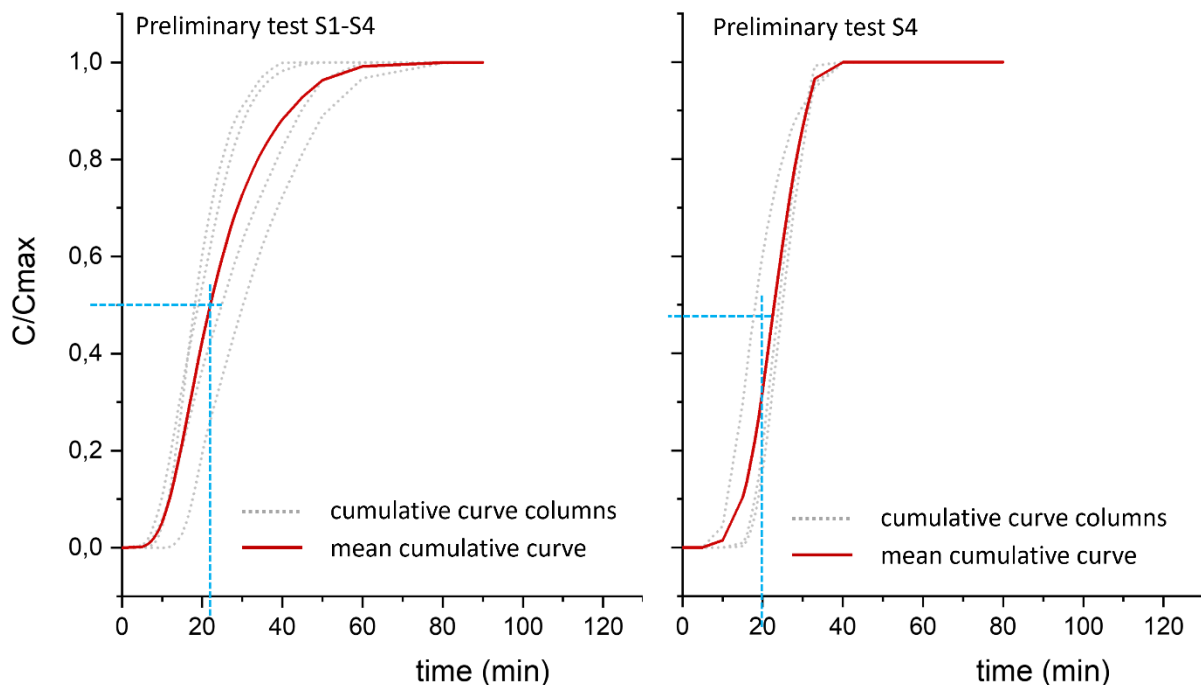

Figure S1.5: On the left side, the cumulative curves of the chloride tracer for the columns from the preliminary test and the corresponding averaged cumulative curve are displayed. The right figure shows the multiple measurements of the chloride tracer for column 4 and its averaged cumulative curve. The cumulative curves indicate the time required for the water front to pass through the entire system at  $C/C_{\text{max}} = 0.5$ .

These estimates were compared to tracer experiments based on NaCl addition and measurements of eluate conductivity observed over time using a hand-help electronic conductivity probe. Baseline values were set by measuring the conductivity of tap water before NaCl addition and compared to the conductivity of the initial salt solution used. The average time for the tracer to pass through was determined at 50% of the resulting cumulative curve. The chloride tracer indicates the time it takes for the chloride ions to pass through the entire system. Subtracting the hose volumes resulted in a required time of  $15.6 \pm 0.4 \text{ min}$  ( $n=3$ ) for

column S4. It is evident that the theoretical considerations, the visual measurement, and the chloride tracer show similar values. Based on this, it is assumed that the chloride tracer is not reactive in the system and can thus be used to calculate the water front.

### **Reaction time of BrCl**

According to US EPA method 1631, a reaction time of 24 hours is recommended for complete extraction of Hg using BrCl for organic-rich samples. To obtain a better overview of the concentration changes during the experiment, a lower reaction time of 1 hour was tested. To detect any concentration differences resulting from the shortened BrCl reaction time in the liquid phase, samples were examined after 1 hour and 24 hours during the pre-experiment. For this purpose, the entire sample amount was divided into two subsamples, and each was treated with BrCl and measured 1 hour and 24 hours after BrCl additions (samples were refrigerated at 4 °C until analysis). It is evident that there is no difference between the samples with a BrCl reaction time of 1 hour and 24 hours (Table S1.2). The recovery rate of the samples with 1 hour reaction time was  $101.5 \pm 7.2\%$  compared to the samples that reacted with BrCl for 24 hours. Thus, the reaction time could be shortened to 1 hour.

Table S1.2 Summary of mercury concentrations in the liquid phase after reaction times of 1 h and 24 h with BrCl. Several time intervals are depicted during which samples were taken for analysis. RPD represents the relative percent difference between samples with a reaction time of 24 h and samples with a reaction time of 1 h.

| <i>Sampling period /min after<br/>start of the experiment</i> | <i>Column</i> | <i>concentration [<math>\mu\text{g L}^{-1}</math>]</i> |                            | <i>RPD [%]</i> |
|---------------------------------------------------------------|---------------|--------------------------------------------------------|----------------------------|----------------|
|                                                               |               | <i>Reaction time [24 h]</i>                            | <i>Reaction time [1 h]</i> |                |
| 200-220                                                       | S1            | 0.7                                                    | 0.7                        | 2.4%           |
|                                                               | S2            | 88.0                                                   | 85.0                       | 3.4%           |
|                                                               | S3            | 1.3                                                    | 1.3                        | -1.1%          |
|                                                               | S4            | 2.7                                                    | 2.4                        | 11.9%          |
| 220-280                                                       | S1            | 1.2                                                    | 1.2                        | -3.0%          |
|                                                               | S2            | 95.5                                                   | 87.1                       | 8.7%           |
|                                                               | S3            | 1.8                                                    | 1.7                        | 9.0%           |
|                                                               | S4            | 3.6                                                    | 3.4                        | 4.9%           |
| 1360-1420                                                     | S1            | 30.8                                                   | 31.1                       | -0.8%          |
|                                                               | S2            | 199.9                                                  | 214.0                      | -7.1%          |
|                                                               | S3            | 45.2                                                   | 47.8                       | -5.8%          |
|                                                               | S4            | 45.1                                                   | 44.3                       | 1.8%           |
| 1570-1610                                                     | S1            | 29.5                                                   | 32.1                       | -8.8%          |
|                                                               | S2            | 221.2                                                  | 218.8                      | 1.1%           |
|                                                               | S3            | 55.7                                                   | 60.6                       | -8.7%          |
|                                                               | S4            | 47.6                                                   | 52.6                       | -10.6%         |
| 1570-1610 filtered                                            | S1            | 23.2                                                   | 23.8                       | -2.6%          |
|                                                               | S2            | 156.4                                                  | 174.2                      | -11.3%         |
|                                                               | S3            | 40.7                                                   | 46.4                       | -14.1%         |
|                                                               | S4            | 35.5                                                   | 35.0                       | 1.3%           |
|                                                               |               |                                                        | Recovery rate 1 h          | 101.5%         |
|                                                               |               |                                                        | S.D.                       | 7.2%           |
|                                                               |               |                                                        | Number of samples          | 20             |

## **Results of the preliminary test**

### **Concentration curve in the liquid phase**

The average concentration trend was depicted as a function of the volume of the HgCl<sub>2</sub>-spiked solution passing through the columns (see Figure S1.6). A total of  $15.5 \pm 0.27$  L passed through each column, and the displayed points were averaged from the four columns. The whiskers in the x and y directions represent the standard deviations of the volume and concentration, respectively. The pre-experiment was divided into three sections, where the initial solution had different concentrations ( $1.7 \pm 0.2$  mg L<sup>-1</sup>,  $7.5 \pm 0.8$  mg L<sup>-1</sup>, and  $49.3 \pm 4.4$  mg L<sup>-1</sup>). At this stock solution concentration, the increase in the liquid phase THg concentration was very little after 10 days. Hence it was deemed too low, and the stock solution increased. At  $7.5 \pm 0.8$  mg L<sup>-1</sup>, the concentration in the liquid phase reached 32.8% of the maximum possible concentration of  $7.5 \pm 0.8$  mg L<sup>-1</sup> of the initial solution after four more days, despite 9 L of  $1.7 \pm 0.2$  mg L<sup>-1</sup> already being added to the columns. Thus, the stock solution concentration was increased again to  $49.3 \pm 4.4$  mg L<sup>-1</sup>. Within two days ( $\approx 2$  L of solution), the concentration in the eluate liquid phase rose to  $26.73 \pm 0.62$  mg L<sup>-1</sup>. Additionally, at the beginning of the newly introduced concentration, a linear increase in the concentration in the liquid phase was observed. At a volume of  $14.5 \pm 0.25$  L, the concentration trend turned nonlinear. The experiment was terminated at 15.5 L. The pre-experiment served solely for assessing the starting concentrations and optimizing the methods.



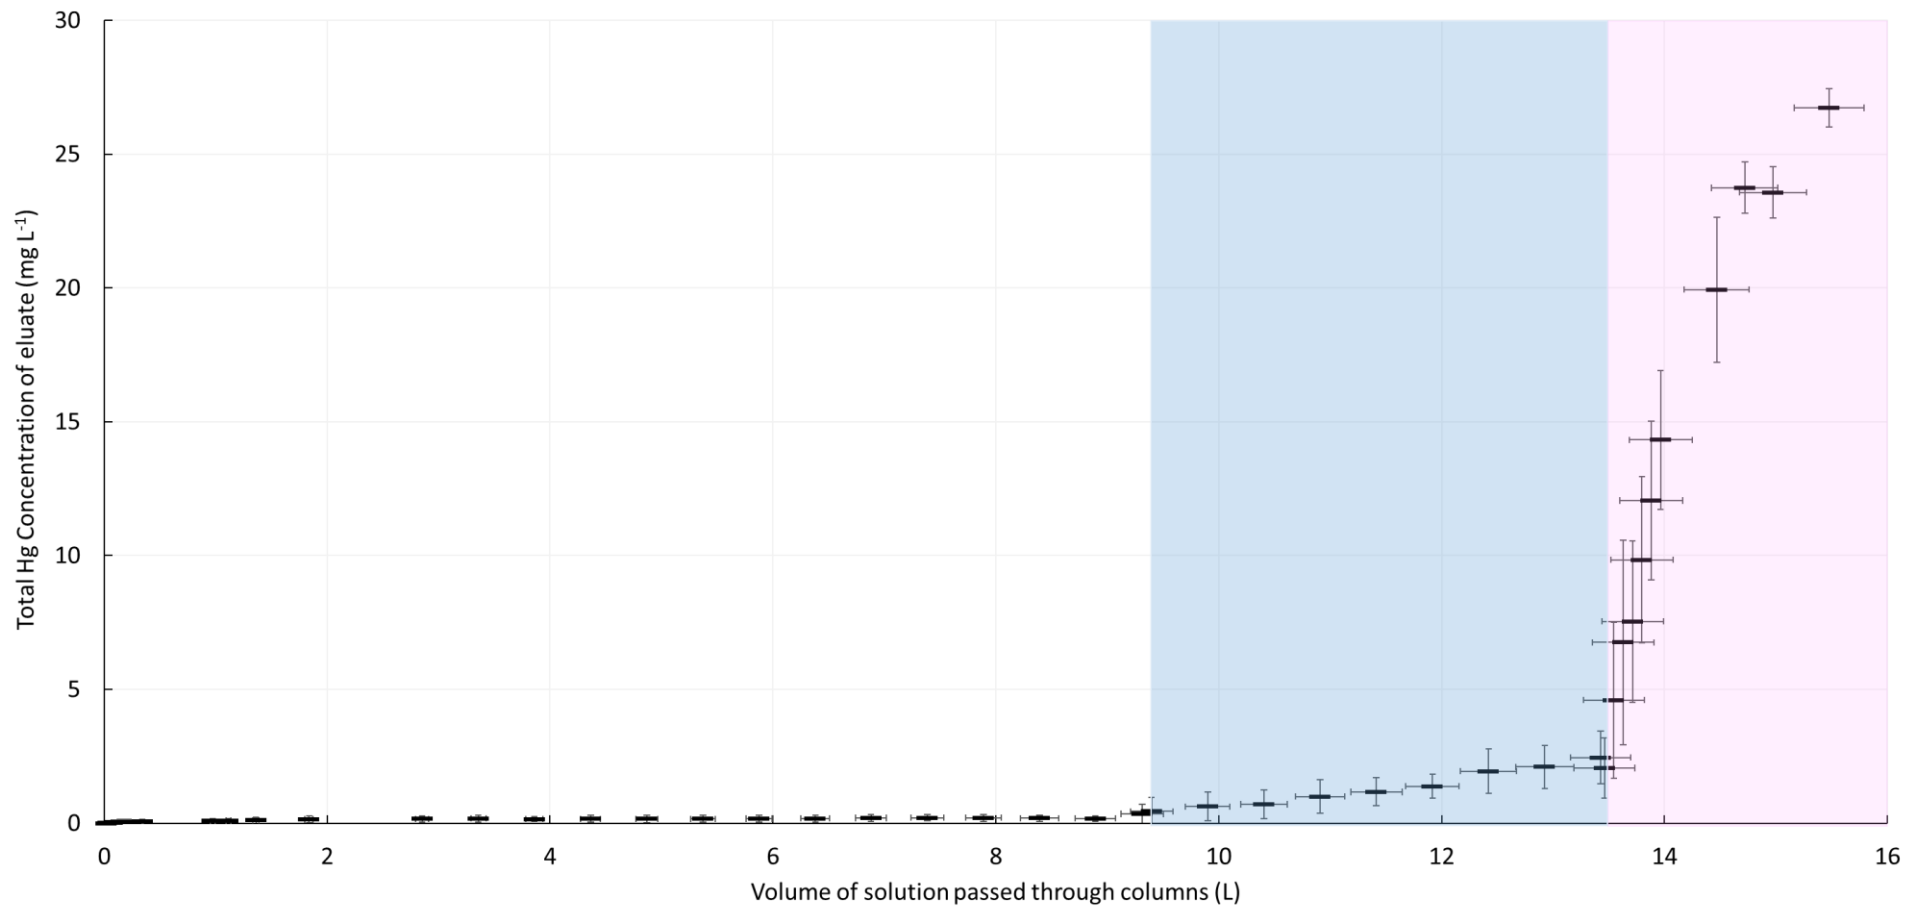

Figure S1.6 : Concentration curve of the preliminary test. Three different initial solutions were tested. In the first section (white), a solution with  $1.7 \pm 0.2 \text{ mg L}^{-1}$  was used, in the second section (blue)  $7.5 \pm 0.8 \text{ mg L}^{-1}$  and in the last section (violet)  $49.3 \pm 4.4 \text{ mg L}^{-1}$ .

## S2. Properties of solid- and liquid-phase materials used in column experiments.

Table S2.1 Results of the particle size distribution of the sieved aquifer material (< 2 mm). The grain size was determined by pipette method according to DIN EN ISO 11277 (2002).

| <i>Grain Size</i> | <i>Grain size range [<math>\mu\text{m}</math>]</i> |              | <i>percentage [%]</i> |
|-------------------|----------------------------------------------------|--------------|-----------------------|
|                   | <i>from</i>                                        | <i>until</i> |                       |
| Coarse sand       | 2000                                               | 630          | 34.04                 |
| Middle sand       | 630                                                | 200          | 22.79                 |
| Fine sand         | 200                                                | 63           | 6.44                  |
| Coarse silt       | 63                                                 | 20           | 16.03                 |
| Middle silt       | 20                                                 | 6.3          | 3.87                  |
| Fine silt         | 6.3                                                | 2            | 3.33                  |
| Clay              | 2                                                  | 0            | 13.50                 |

Table S2.2 Results of the ICP-OES analysis for the tap water that was also used to mix the  $\text{HgCl}_2$  solution. The eluate shown here describes the tap water used to rinse the columns. After a rinse of 24 h, this eluate was analyzed as well as at a rinse time of 48 h. These results lead to us using a minimum equilibration time of tapwater within the columns of 7 days for the actual experiments. Data under "Element" column show the wavelength examined for each element.

| <i>Element</i> | <i>Unit</i>          | <i>Tap Water</i> | <i>Eluate after 24 h rinse</i> | <i>Eluate after 48 h rinse</i> |
|----------------|----------------------|------------------|--------------------------------|--------------------------------|
| DOC            | mg L <sup>-1</sup>   | 2.29             | 3.25                           | 2.68                           |
| Ca 317.933     | mg L <sup>-1</sup>   | 34.82            | 61.52                          | 154.19                         |
| Ca 315.887     | mg L <sup>-1</sup>   | 34.76            | 61.55                          | 154.28                         |
| Fe 238.204     | $\mu\text{g L}^{-1}$ | 0.52             | 2.91                           | 14.03                          |
| Fe 259.940     | $\mu\text{g L}^{-1}$ | 0.21             | 2.54                           | 15.38                          |
| K 766.491      | mg L <sup>-1</sup>   | 1.18             | 1.92                           | 3.20                           |
| K 769.897      | mg L <sup>-1</sup>   | 1.32             | 2.02                           | 3.04                           |
| Mg 280.270     | mg L <sup>-1</sup>   | 3.98             | 3.23                           | 6.66                           |
| Mg 285.213     | mg L <sup>-1</sup>   | 3.92             | 3.18                           | 6.27                           |
| Mn 257.610     | $\mu\text{g L}^{-1}$ | 3.91             | 177.24                         | 16.83                          |
| Mn 259.372     | $\mu\text{g L}^{-1}$ | 3.71             | 175.99                         | 16.60                          |
| Na 589.592     | mg L <sup>-1</sup>   | 16.23            | 19.76                          | 44.15                          |
| Na 588.995     | mg L <sup>-1</sup>   | 14.98            | 18.61                          | 41.85                          |
| Si 251.611     | mg L <sup>-1</sup>   | 3.06             | 5.61                           | 4.48                           |
| Si 288.158     | mg L <sup>-1</sup>   | 3.08             | 5.64                           | 4.52                           |
| Sr 407.771     | $\mu\text{g L}^{-1}$ | 132.96           | 128.76                         | 326.80                         |
| Sr 421.552     | $\mu\text{g L}^{-1}$ | 131.51           | 126.07                         | 329.92                         |
| Zn 202.548     | $\mu\text{g L}^{-1}$ | 112.09           | 3.21                           | 5.03                           |
| Zn 206.200     | $\mu\text{g L}^{-1}$ | 117.65           | 18.06                          | 7.87                           |
| Zn 213.857     | $\mu\text{g L}^{-1}$ | 106.33           | 6.53                           | 8.05                           |

Table S2.3 Results of the study of the following parameters: pH, electrical conductivity, oxygen content and concentration, and redox potential for the tap water used to prepare the HgCl<sub>2</sub> solution, as well as the HgCl<sub>2</sub> solutions used to contaminate the columns and the eluates collected after the columns.

|                                                                    | <i>pH</i>  | <i>Electrical Conductivity</i> | <i>Oxygen</i> | <i>Oxygen conc.</i>        | <i>Redox potential</i> |
|--------------------------------------------------------------------|------------|--------------------------------|---------------|----------------------------|------------------------|
|                                                                    | <i>[-]</i> | <i>[μS]</i>                    | <i>[%]</i>    | <i>[mg L<sup>-1</sup>]</i> | <i>[mV]</i>            |
| HgCl <sub>2</sub> -Solution<br>[46.1 ± 1.1 mg L <sup>-1</sup> ]    | 7.7        | 218.4                          | 97.7          | 9.42                       | 249.4                  |
| HgCl <sub>2</sub> -Solution<br>[143.72 ± 6.17 mg L <sup>-1</sup> ] | 7.8        | 342.3                          | 99.8          | 9.86                       | 324                    |
| Tap Water                                                          | 7.9        | 421                            | 95.4          | 9.09                       | 309                    |
| Eluate<br>[46.1 ± 1.1 mg L <sup>-1</sup> ]                         | 7.9        | 337.1                          | 98.9          | 9.78                       | 195                    |
| Eluate<br>[143.72 ± 6.17 mg L <sup>-1</sup> ]                      | 8.1        | 327.6                          | 99.9          | 9.89                       | 193                    |

Table S2.4: Initial data of the columns. Listed is the filled dry mass of the sieved aquifer material, the volume as well as the resulting bulk density divided into EXP1 (46.1 ± 1.1 mg L<sup>-1</sup>) and EXP2 (143.72 ± 6.17 mg L<sup>-1</sup>).

| <i>Column</i> | <i>EXP1 (46.1 ± 1.1 mg L<sup>-1</sup>)</i> |                    |                                        | <i>EXP2 (143.72 ± 6.17 mg L<sup>-1</sup>)</i> |                    |                                        |
|---------------|--------------------------------------------|--------------------|----------------------------------------|-----------------------------------------------|--------------------|----------------------------------------|
|               | <i>Dry mass [g]</i>                        | <i>Volume [ml]</i> | <i>Bulk density [g/cm<sup>3</sup>]</i> | <i>Dry mass [g]</i>                           | <i>Volume [ml]</i> | <i>Bulk density [g/cm<sup>3</sup>]</i> |
| C1.1/C2.1     | 70.10                                      | 49.5               | 1.43                                   | 70.04                                         | 49.0               | 1.42                                   |
| C1.2/C2.2     | 70.06                                      | 50.0               | 1.40                                   | 70.05                                         | 48.5               | 1.44                                   |
| C1.3/C2.3     | 70.18                                      | 50.5               | 1.40                                   | 70.09                                         | 49.0               | 1.43                                   |
| C1.4/C2.4     | 70.10                                      | 50.0               | 1.40                                   | 70.01                                         | 49.0               | 1.43                                   |
| C1.5/C2.5     | 70.05                                      | 49.0               | 1.43                                   | 70.02                                         | 49.0               | 1.43                                   |
| C1.6/C2.6     | 70.07                                      | 49.5               | 1.42                                   | 70.07                                         | 49.5               | 1.42                                   |
| C1.7/C2.7     | 70.04                                      | 49.5               | 1.42                                   | 70.04                                         | 49.5               | 1.42                                   |
| C1.8/C2.8     | 70.08                                      | 49.5               | 1.42                                   | 70.05                                         | 49.0               | 1.43                                   |

Table S2.5: Summary of the volumetric flow of the peristaltic pump for EXP1 and EXP2 measured via volume collections over time before and after each experiment.

|               | <i>EXP1 (46.1 ± 1.1 mg L<sup>-1</sup>)</i>        |                                                           | <i>EXP2 (143.72 ± 6.17 mg L<sup>-1</sup>)</i>     |                                                           |
|---------------|---------------------------------------------------|-----------------------------------------------------------|---------------------------------------------------|-----------------------------------------------------------|
| <i>Column</i> | <i>Flowrate</i>                                   |                                                           | <i>Flowrate</i>                                   |                                                           |
|               | <i>Mean value</i><br><i>[ml min<sup>-1</sup>]</i> | <i>Standard deviation</i><br><i>[ml min<sup>-1</sup>]</i> | <i>Mean value</i><br><i>[ml min<sup>-1</sup>]</i> | <i>Standard deviation</i><br><i>[ml min<sup>-1</sup>]</i> |
| C1.1/C2.1     | 0.64                                              | 0.00                                                      | 0.60                                              | 0.01                                                      |
| C1.2/C2.2     | 0.63                                              | 0.01                                                      | 0.61                                              | 0.01                                                      |
| C1.3/C2.3     | 0.60                                              | 0.00                                                      | 0.58                                              | 0.00                                                      |
| C1.4/C2.4     | 0.62                                              | 0.00                                                      | 0.60                                              | 0.00                                                      |
| C1.5/C2.5     | 0.66                                              | 0.01                                                      | 0.63                                              | 0.03                                                      |
| C1.6/C2.6     | 0.63                                              | 0.01                                                      | 0.63                                              | 0.01                                                      |
| C1.7/C2.7     | 0.61                                              | 0.01                                                      | 0.64                                              | 0.00                                                      |
| C1.8/C2.8     | 0.63                                              | 0.07                                                      | 0.66                                              | 0.00                                                      |

### S3. Sorbed quantities of Hg in column experiments.

Table S3.1: Summary of the quantities of mercury added and sorbed as well as the quantities of mercury that could be desorbed again.

| <b>EXP1 (46.1 ± 1.1 mg L<sup>-1</sup>)</b>    |                        |                         |            |                           |            |
|-----------------------------------------------|------------------------|-------------------------|------------|---------------------------|------------|
|                                               | <i>Added Hg amount</i> | <i>sorbed Hg amount</i> |            | <i>Desorbed Hg amount</i> |            |
|                                               | <i>[mg]</i>            | <i>[mg]</i>             | <i>[%]</i> | <i>[mg]</i>               | <i>[%]</i> |
| C1.1                                          | 294.2                  | 132.7                   | 45.1       | 75.3                      | 56.7       |
| C1.2                                          | 294.1                  | 138.3                   | 47.0       | 76.0                      | 55.0       |
| C1.3                                          | 275.7                  | 131.6                   | 47.7       | 72.1                      | 54.8       |
| C1.4                                          | 284.9                  | 131.4                   | 46.1       | -                         | -          |
| C1.5                                          | 303.3                  | 134.0                   | 44.2       | -                         | -          |
| C1.6                                          | 289.5                  | 130.8                   | 45.2       | -                         | -          |
| C1.7                                          | 97.9                   | 92.5                    | 94.5       | -                         | -          |
| C1.8                                          | 101.1                  | 91.4                    | 90.4       | -                         | -          |
| <b>EXP2 (143.72 ± 6.17 mg L<sup>-1</sup>)</b> |                        |                         |            |                           |            |
|                                               | <i>Added Hg amount</i> | <i>sorbed Hg amount</i> |            | <i>Desorbed Hg amount</i> |            |
|                                               | <i>[mg]</i>            | <i>[mg]</i>             | <i>[%]</i> | <i>[mg]</i>               | <i>[%]</i> |
| C2.1                                          | 801.1                  | 193.5                   | 24.1       | 98.4                      | 50.9       |
| C2.2                                          | 814.5                  | 188.6                   | 23.2       | 97.2                      | 51.6       |
| C2.3                                          | 774.4                  | 202.8                   | 26.2       | 98.4                      | 48.5       |
| C2.4                                          | 86.2                   | 72.2                    | 83.8       | -                         | -          |
| C2.5                                          | 90.5                   | 80.1                    | 88.5       | -                         | -          |
| C2.6                                          | 841.2                  | 194.0                   | 23.1       | -                         | -          |
| C2.7                                          | 854.5                  | 199.8                   | 23.4       | -                         | -          |
| C2.8                                          | 881.2                  | 197.7                   | 22.4       | -                         | -          |

## S4. Liquid-phase speciation analyses.

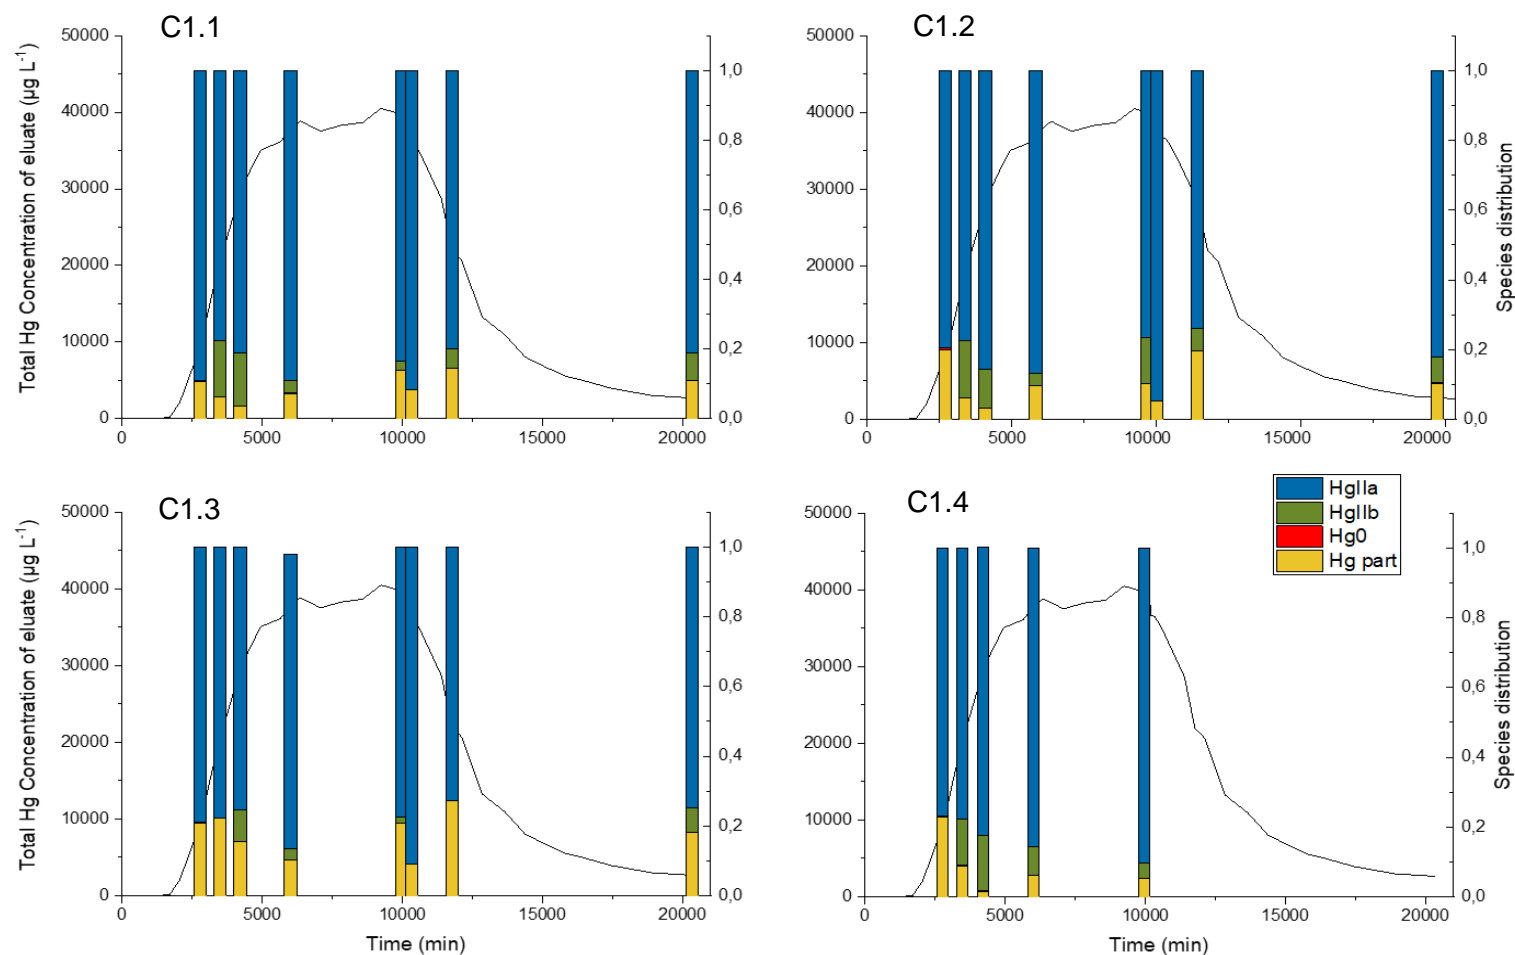

FigureS4.1: Representation of the Hg speciation in the liquid phase of EXP1 with columns C1.1 to C1.4. Each column is shown separately. The averaged concentration curve of the entire experiment is shown in the background. The speciation at  $\frac{1}{4}$ ,  $\frac{1}{2}$ , and  $\frac{3}{4}$  breakthrough as well as at the beginning and end of the sorption maximum, at the beginning and at the end of the desorption was investigated. Columns C1.1 to C1.3 reached the end of desorption. C1.4 to C1.6 were separated from the system after reaching the specified sorption maximum, while C1.7 and C1.8 were already separated from the system at half of the sorption curve. “Hg part” = Hg associated with particulates, referred to as Hg(II)P in the main manuscript.

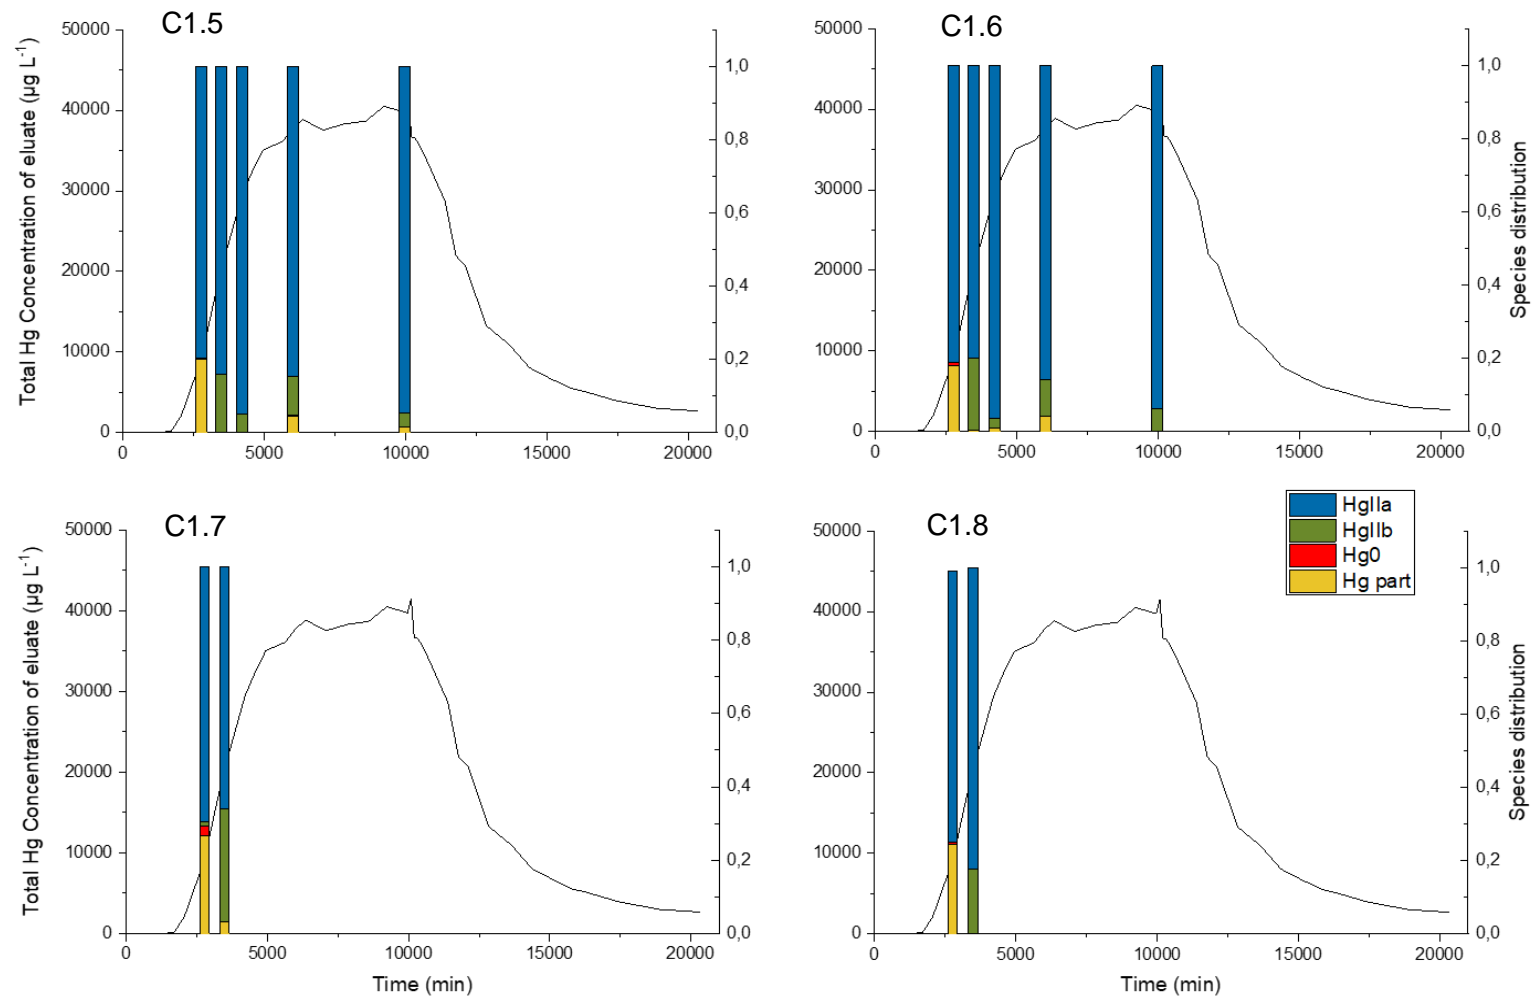

Figure S4.2: Plot of Hg speciation in the liquid phase of EXP1 ( $46.1 \pm 1.1 \text{ mg L}^{-1}$ ) with columns C1.5 to C1.8. Each column is shown separately. The averaged concentration curve of the entire experiment is shown in the background. The speciation at  $\frac{1}{4}$ ,  $\frac{1}{2}$ , and  $\frac{3}{4}$  breakthrough as well as at the beginning and end of the sorption maximum, at the beginning and at the end of the desorption was investigated. Columns C1.1 to C1.3 reached the end of desorption. C1.4 to C1.6 were separated from the system after reaching the specified sorption maximum, while C1.7 and C1.8 were already separated from the system at half of the sorption curve. “Hg part” = Hg associated with particulates, referred to as Hg(II)P in the main manuscript.

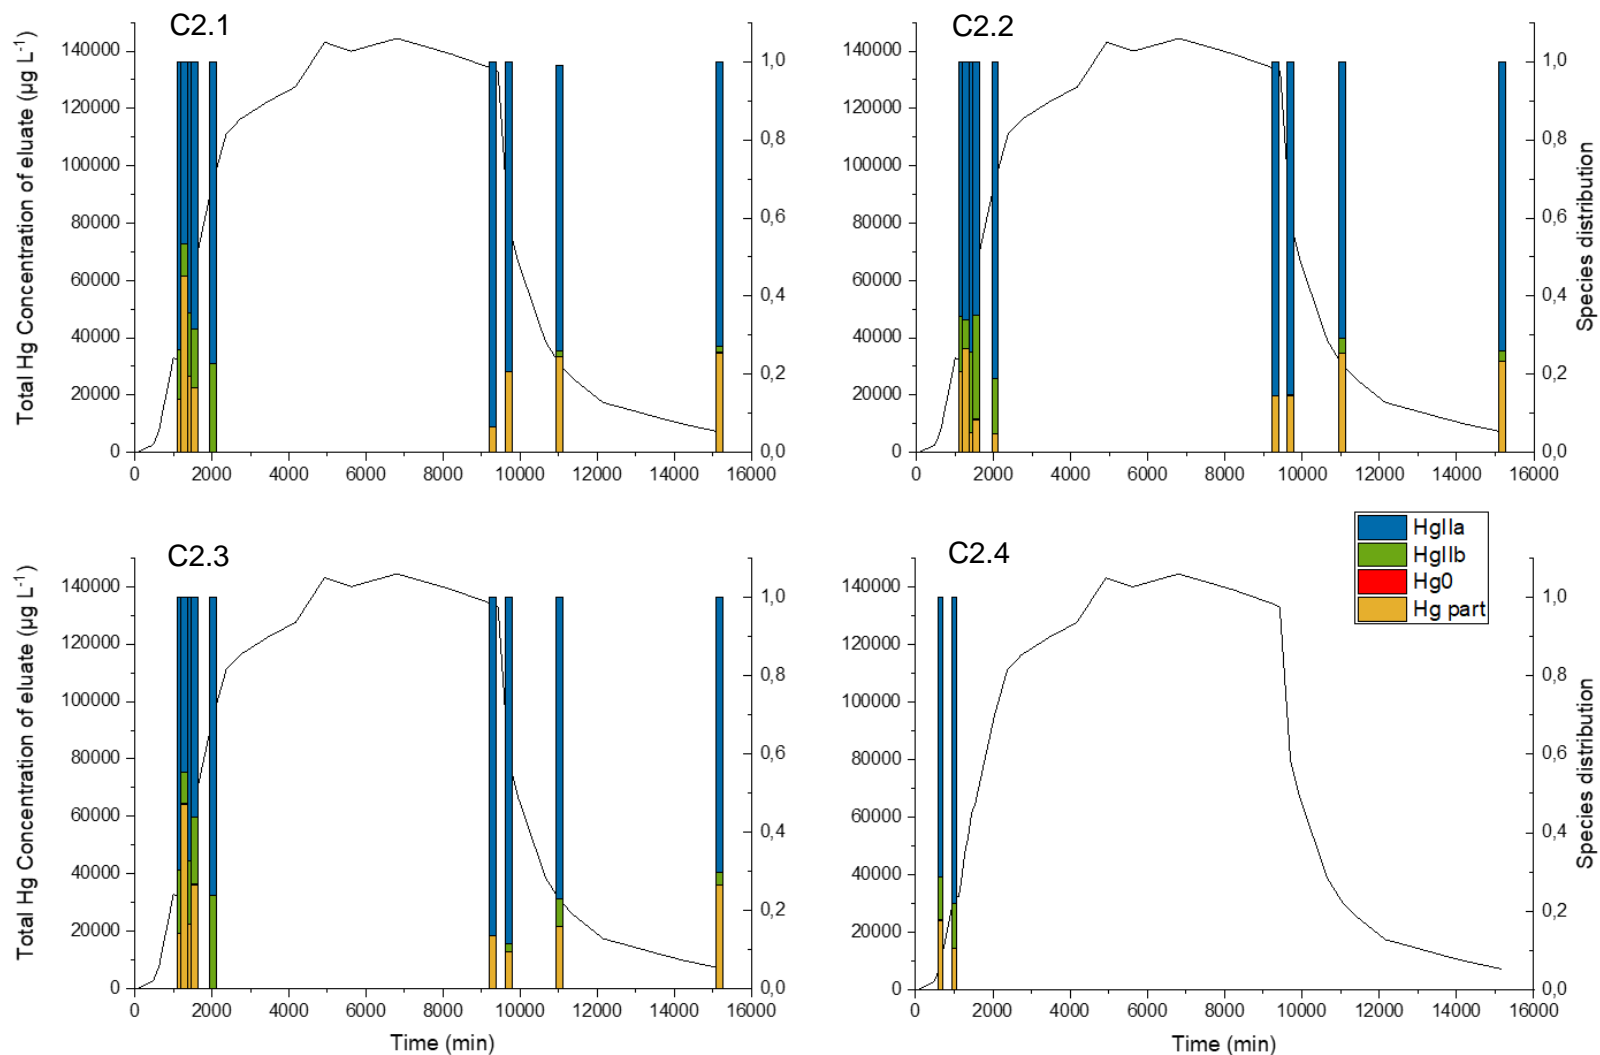

Figure S1.3: Plot of Hg speciation of columns C2.1 to C2.4 in the liquid phase of EXP2 ( $143.72 \pm 6.17 \text{ mg L}^{-1}$ ). The columns show the species distribution, while the mean concentration curve is shown in the background. C2.1 to C2.3 underwent the sorption and desorption process. Shown here are  $\frac{1}{4}$ ,  $\frac{1}{2}$ ,  $\frac{3}{4}$  breakthrough, the sorption maximum,  $\frac{1}{4}$  of desorption,  $\frac{1}{2}$  of desorption, and the end of the experiment. C2.4 was separated from the system halfway through the sorption process. “Hg part” = Hg associated with particulates, referred to as Hg(II)P in the main manuscript.



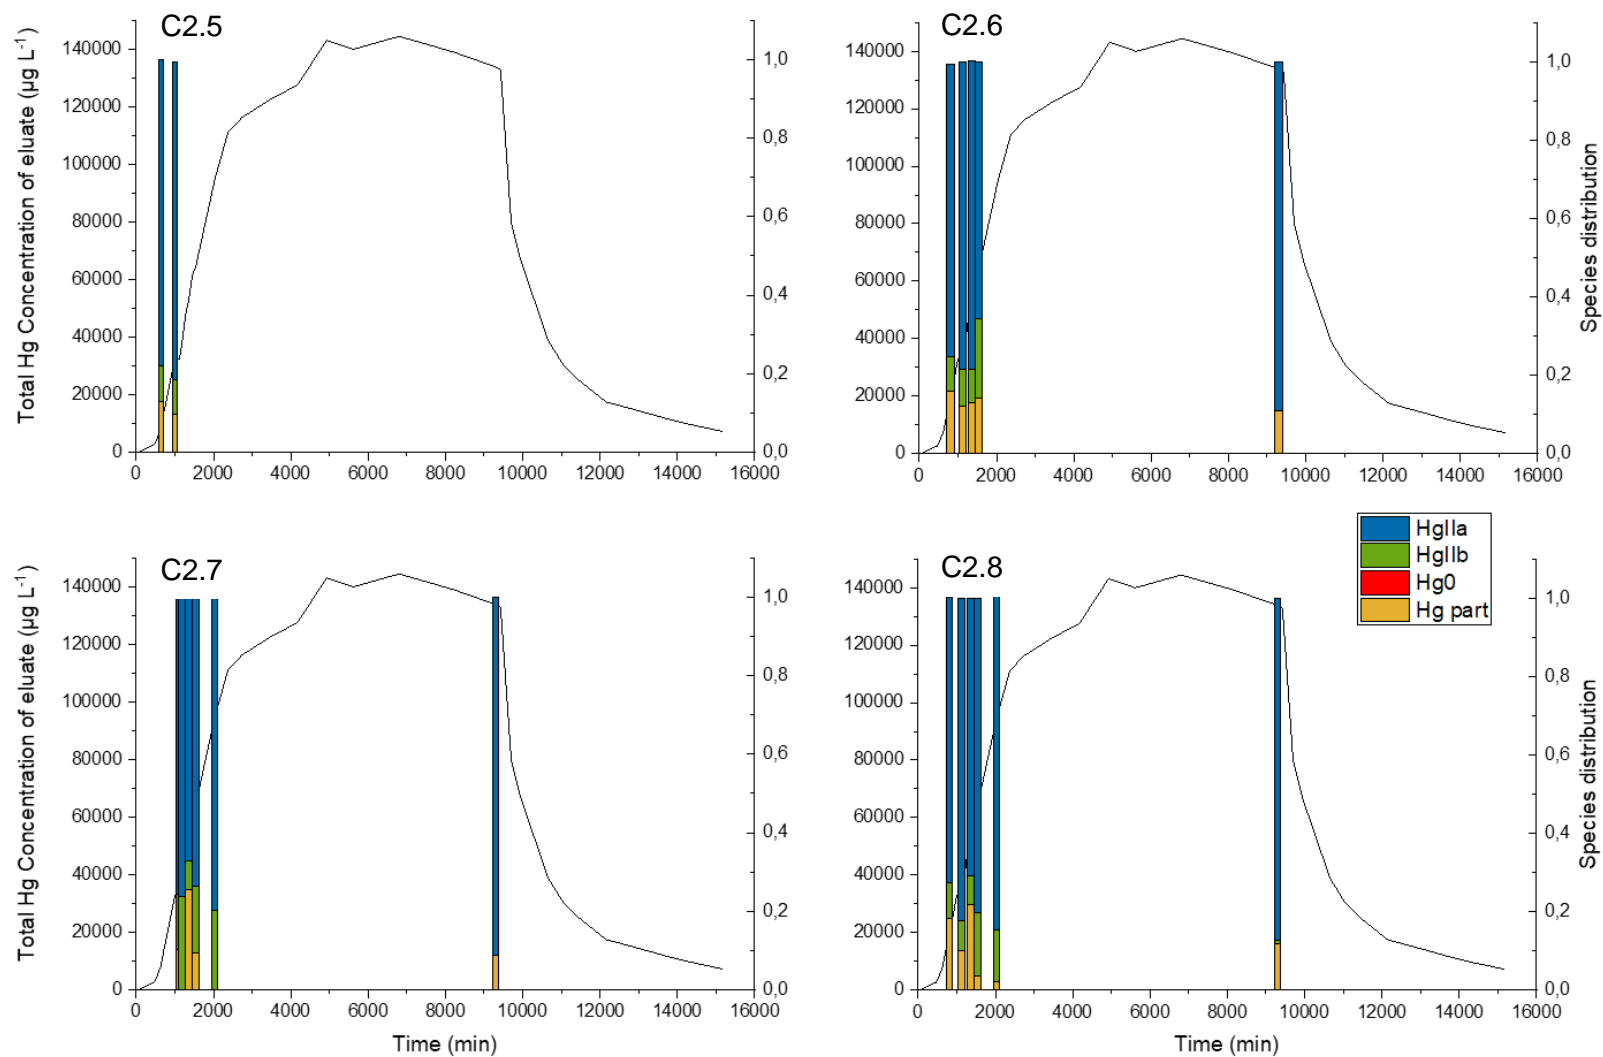

Figure S4.4: Shown is the distribution of Hg species of EXP2 ( $143.72 \pm 6.17 \text{ mg L}^{-1}$ ) in columns C2.5 to C2.8. C2.5 was separated from the system at half sorption, while C2.6 to C2.8 extend to the sorption maximum. “Hg part” = Hg associated with particulates, referred to as Hg(II)P in the main manuscript.

Table S4.1 Summary of percent species distribution in EXP1 ( $46.1 \pm 1.1 \text{ mg L}^{-1}$ ). Stock solution was measured (purged) for Hg(0) and the mean fraction of Hg(0) was  $0.011 \pm 0.003 \%$ .

| Experiment Duration<br>[min]                      | Sorption                |                          |                          |                          |                     | Desorption              |                        |                       |
|---------------------------------------------------|-------------------------|--------------------------|--------------------------|--------------------------|---------------------|-------------------------|------------------------|-----------------------|
|                                                   | 2770                    | 3480                     | 4205                     | 6005                     | 9965                | 10325                   | 11770                  | 20350                 |
| Mean THg conc. in eluate [ $\mu\text{g L}^{-1}$ ] | 9125.8                  | 20380.8                  | 29453.2                  | 37809.2                  | 39755.8             | 36577.3                 | 21943.5                | 2667.5                |
| Standard Deviation<br>[ $\mu\text{g L}^{-1}$ ]    | 4086.0                  | 2038.0                   | 2124.1                   | 1485.4                   | 685.9               | 476.9                   | 886.7                  | 183.9                 |
| <b>C1.1</b>                                       |                         |                          |                          |                          |                     |                         |                        |                       |
| Hg(II)P                                           | 10.6%                   | -                        | 3.5%                     | 7.2%                     | 13.9%               | 8.2%                    | 14.3%                  | 10.8%                 |
| Hg(0)                                             | 0.4%                    | -                        | 0.0%                     | 0.1%                     | 0.0%                | 0.0%                    | 0.1%                   | 0.1%                  |
| Hg(II) <sub>b</sub>                               | 0.0%                    | -                        | 15.2%                    | 3.6%                     | 2.6%                | 0.0%                    | 5.6%                   | 8.0%                  |
| Hg(II) <sub>a</sub>                               | 89.0%                   | -                        | 81.2%                    | 89.1%                    | 83.6%               | 91.7%                   | 80.0%                  | 81.1%                 |
| <b>C1.2</b>                                       |                         |                          |                          |                          |                     |                         |                        |                       |
| Hg(II)P                                           | 19.8%                   | 6.1%                     | 3.3%                     | 9.6%                     | 10.3%               | 5.3%                    | 19.7%                  | 10.4%                 |
| Hg(0)                                             | 0.6%                    | 0.1%                     | 0.0%                     | 0.1%                     | 0.0%                | 0.0%                    | 0.0%                   | 0.2%                  |
| Hg(II) <sub>b</sub>                               | 0.0%                    | 16.3%                    | 11.1%                    | 3.4%                     | 13.1%               | 0.0%                    | 6.2%                   | 7.2%                  |
| Hg(II) <sub>a</sub>                               | 79.6%                   | 77.5%                    | 85.5%                    | 86.9%                    | 76.5%               | 94.7%                   | 74.0%                  | 82.3%                 |
| <b>C1.3</b>                                       |                         |                          |                          |                          |                     |                         |                        |                       |
| Hg(II)P                                           | 20.9%                   | 22.2%                    | 15.6%                    | 10.1%                    | 20.8%               | 9.1%                    | 27.3%                  | 18.0%                 |
| Hg(0)                                             | 0.2%                    | 0.1%                     | 0.1%                     | 0.1%                     | 0.0%                | 0.0%                    | 0.0%                   | 0.1%                  |
| Hg(II) <sub>b</sub>                               | 0.0%                    | 0.0%                     | 9.1%                     | 3.3%                     | 1.8%                | 0.0%                    | 0.0%                   | 7.1%                  |
| Hg(II) <sub>a</sub>                               | 78.9%                   | 77.7%                    | 75.3%                    | 84.5%                    | 77.3%               | 90.9%                   | 72.6%                  | 74.8%                 |
| <b>C1.4</b>                                       |                         |                          |                          |                          |                     |                         |                        |                       |
| Hg(II)P                                           | 23.0%                   | 8.9%                     | 1.6%                     | 6.1%                     | 5.2%                | -                       | -                      | -                     |
| Hg(0)                                             | 0.3%                    | 0.1%                     | 0.1%                     | 0.1%                     | 0.0%                | -                       | -                      | -                     |
| Hg(II) <sub>b</sub>                               | 0.0%                    | 13.4%                    | 16.0%                    | 8.3%                     | 4.6%                | -                       | -                      | -                     |
| Hg(II) <sub>a</sub>                               | 76.8%                   | 77.6%                    | 82.7%                    | 85.5%                    | 90.3%               | -                       | -                      | -                     |
| <b>C1.5</b>                                       |                         |                          |                          |                          |                     |                         |                        |                       |
| Hg(II)P                                           | 19.9%                   | 0.0%                     | 0.0%                     | 4.5%                     | 1.5%                | -                       | -                      | -                     |
| Hg(0)                                             | 0.3%                    | 0.1%                     | 0.1%                     | 0.0%                     | 0.0%                | -                       | -                      | -                     |
| Hg(II) <sub>b</sub>                               | 0.0%                    | 15.7%                    | 4.9%                     | 10.6%                    | 3.7%                | -                       | -                      | -                     |
| Hg(II) <sub>a</sub>                               | 79.8%                   | 84.2%                    | 95.0%                    | 84.8%                    | 94.8%               | -                       | -                      | -                     |
| <b>C1.6</b>                                       |                         |                          |                          |                          |                     |                         |                        |                       |
| Hg(II)P                                           | 18.0%                   | 0.2%                     | 0.8%                     | 4.1%                     | 0.0%                | -                       | -                      | -                     |
| Hg(0)                                             | 0.7%                    | 0.1%                     | 0.0%                     | 0.0%                     | 0.0%                | -                       | -                      | -                     |
| Hg(II) <sub>b</sub>                               | 0.0%                    | 19.6%                    | 2.6%                     | 10.0%                    | 6.2%                | -                       | -                      | -                     |
| Hg(II) <sub>a</sub>                               | 81.3%                   | 80.1%                    | 96.6%                    | 85.9%                    | 93.6%               | -                       | -                      | -                     |
| <b>C1.7</b>                                       |                         |                          |                          |                          |                     |                         |                        |                       |
| Hg(II)P                                           | 26.5%                   | 3.1%                     | -                        | -                        | -                   | -                       | -                      | -                     |
| Hg(0)                                             | 2.8%                    | 0.1%                     | -                        | -                        | -                   | -                       | -                      | -                     |
| Hg(II) <sub>b</sub>                               | 1.2%                    | 30.9%                    | -                        | -                        | -                   | -                       | -                      | -                     |
| Hg(II) <sub>a</sub>                               | 69.5%                   | 65.9%                    | -                        | -                        | -                   | -                       | -                      | -                     |
| <b>C1.8</b>                                       |                         |                          |                          |                          |                     |                         |                        |                       |
| Hg(II)P                                           | 24.5%                   | 0.0%                     | -                        | -                        | -                   | -                       | -                      | -                     |
| Hg(0)                                             | 0.4%                    | 0.1%                     | -                        | -                        | -                   | -                       | -                      | -                     |
| Hg(II) <sub>b</sub>                               | 0.0%                    | 17.4%                    | -                        | -                        | -                   | -                       | -                      | -                     |
| Hg(II) <sub>a</sub>                               | 74.1%                   | 82.4%                    | -                        | -                        | -                   | -                       | -                      | -                     |
| <b>Summary Statistics</b>                         |                         |                          |                          |                          |                     |                         |                        |                       |
| <b>Mean</b>                                       | <b>25% Breakthrough</b> | <b>50 % Breakthrough</b> | <b>75 % Breakthrough</b> | <b>Begin equilibrium</b> | <b>End Sorption</b> | <b>Begin Desorption</b> | <b>50 % Desorption</b> | <b>End Desorption</b> |
| Hg(II)P                                           | 20.4%                   | 5.8%                     | 4.1%                     | 6.9%                     | 8.6%                | 7.5%                    | 20.4%                  | 13.1%                 |
| Hg(0)                                             | 0.7%                    | 0.1%                     | 0.0%                     | 0.1%                     | 0.0%                | 0.0%                    | 0.0%                   | 0.1%                  |
| Hg(II) <sub>b</sub>                               | 0.1%                    | 16.2%                    | 9.8%                     | 6.5%                     | 5.3%                | 0.0%                    | 3.9%                   | 7.4%                  |
| Hg(II) <sub>a</sub>                               | 78.6%                   | 77.9%                    | 86.0%                    | 86.1%                    | 86.0%               | 92.4%                   | 75.6%                  | 79.4%                 |
| <b>Standard Deviation</b>                         |                         |                          |                          |                          |                     |                         |                        |                       |
| Hg(II)P                                           | 4.8%                    | 8.0%                     | 5.8%                     | 2.3%                     | 8.0%                | 2.0%                    | 6.5%                   | 4.3%                  |
| Hg(0)                                             | 0.8%                    | 0.0%                     | 0.0%                     | 0.0%                     | 0.0%                | 0.0%                    | 0.0%                   | 0.0%                  |
| Hg(II) <sub>b</sub>                               | 0.4%                    | 9.1%                     | 5.4%                     | 3.2%                     | 4.1%                | 0.0%                    | 3.4%                   | 0.5%                  |
| Hg(II) <sub>a</sub>                               | 5.6%                    | 5.9%                     | 8.3%                     | 1.5%                     | 8.1%                | 2.0%                    | 3.9%                   | 4.1%                  |

Table S4.2: Summary of species concentrations in EXP1 ( $46.1 \pm 1.1 \text{ mg L}^{-1}$ ). Values in red are negative concentrations caused by subtraction of two measured values. These are considered as zero and highlight why we consider these semi-quantitative analyses. Stock solution was measured (purged) for Hg(0) and the mean concentration was  $5.1 \pm 1.3 \text{ } \mu\text{g L}^{-1}$  ( $n = 3$ ).

|                                                   | Sorption         |                   |                   |                   |              | Desorption       |                 |                |
|---------------------------------------------------|------------------|-------------------|-------------------|-------------------|--------------|------------------|-----------------|----------------|
| Experiment Duration [min]                         | 2770             | 3480              | 4205              | 6005              | 9965         | 10325            | 11770           | 20350          |
| Mean THg conc. in eluate [ $\mu\text{g L}^{-1}$ ] | 9125.8           | 20380.8           | 29453.2           | 37809.2           | 39755.8      | 36577.3          | 21943.5         | 2667.5         |
| Standard Deviation [ $\mu\text{g L}^{-1}$ ]       | 4086.0           | 2038.0            | 2124.1            | 1485.4            | 685.9        | 476.9            | 886.7           | 183.9          |
| <b>C1.1</b>                                       |                  |                   |                   |                   |              |                  |                 |                |
| Hg <sub>(part)</sub>                              | 564.2            | -                 | 1264.0            | 2757.7            | 5645.8       | 3058.0           | 2982.3          | 271.1          |
| Hg(0)                                             | 29.8             | -                 | 15.8              | 24.3              | 13.0         | 10.3             | 10.6            | 2.5            |
| Hg(II) <sub>b</sub>                               | -1109.0          | -                 | 4973.6            | 1390.7            | 1043.5       | -2438.9          | 1169.4          | 200.4          |
| Hg(II) <sub>a</sub>                               | 7356.1           | -                 | 27233.1           | 34219.7           | 34052.1      | 36569.8          | 16657.2         | 2036.6         |
| <b>C1.2</b>                                       |                  |                   |                   |                   |              |                  |                 |                |
| Hg <sub>(part)</sub>                              | 1632.7           | 1228.5            | 990.2             | 3761.8            | 4144.5       | 1928.8           | 4529.2          | 265.9          |
| Hg(0)                                             | 50.3             | 16.3              | 0.3               | 23.7              | 14.2         | 11.2             | 10.5            | 4.0            |
| Hg(II) <sub>b</sub>                               | -732.4           | 3290.8            | 3294.1            | 1347.3            | 5271.7       | -807.5           | 1429.9          | 185.9          |
| Hg(II) <sub>a</sub>                               | 7292.6           | 15645.7           | 25309.3           | 34015.2           | 30708.7      | 35359.5          | 17017.5         | 2112.5         |
| <b>C1.3</b>                                       |                  |                   |                   |                   |              |                  |                 |                |
| Hg <sub>(part)</sub>                              | 2846.9           | 4297.6            | 4172.8            | 3523.8            | 8249.9       | 3162.3           | 6017.0          | 527.3          |
| Hg(0)                                             | 31.1             | 16.7              | 17.9              | 18.6              | 10.7         | 10.1             | 9.1             | 3.4            |
| Hg(II) <sub>b</sub>                               | -2432.4          | -281.9            | 2431.0            | 1149.7            | 718.7        | -2285.3          | -271.7          | 207.3          |
| Hg(II) <sub>a</sub>                               | 13276.1          | 15292.7           | 20144.0           | 29414.8           | 30618.6      | 35222.6          | 16269.4         | 2187.7         |
| <b>C1.4</b>                                       |                  |                   |                   |                   |              |                  |                 |                |
| Hg <sub>(part)</sub>                              | 3507.0           | 1933.2            | 338.6             | 2251.3            | 2064.8       | -                | -               | -              |
| Hg(0)                                             | 39.3             | 24.2              | 19.0              | 35.5              | 13.8         | -                | -               | -              |
| Hg(II) <sub>b</sub>                               | -2479.3          | 2907.8            | 4288.5            | 3087.0            | 1819.7       | -                | -               | -              |
| Hg(II) <sub>a</sub>                               | 14208.2          | 16844.8           | 22201.0           | 31764.1           | 36086.3      | -                | -               | -              |
| <b>C1.5</b>                                       |                  |                   |                   |                   |              |                  |                 |                |
| Hg <sub>(part)</sub>                              | 2561.5           | -625.0            | -1323.8           | 1761.9            | 580.8        | -                | -               | -              |
| Hg(0)                                             | 36.2             | 25.5              | 15.4              | 19.3              | 9.3          | -                | -               | -              |
| Hg(II) <sub>b</sub>                               | -1117.8          | 3503.2            | 1471.7            | 4128.8            | 1458.9       | -                | -               | -              |
| Hg(II) <sub>a</sub>                               | 11362.4          | 19475.8           | 29678.7           | 32902.5           | 37505.5      | -                | -               | -              |
| <b>C1.6</b>                                       |                  |                   |                   |                   |              |                  |                 |                |
| Hg <sub>(part)</sub>                              | 964.7            | 43.0              | 248.6             | 1594.5            | -323.8       | -                | -               | -              |
| Hg(0)                                             | 39.8             | 16.1              | 12.7              | 16.3              | 7.5          | -                | -               | -              |
| Hg(II) <sub>b</sub>                               | -301.1           | 4128.5            | 805.8             | 3852.9            | 2386.6       | -                | -               | -              |
| Hg(II) <sub>a</sub>                               | 4664.8           | 16852.1           | 29891.6           | 33181.4           | 36819.1      | -                | -               | -              |
| <b>C1.7</b>                                       |                  |                   |                   |                   |              |                  |                 |                |
| Hg <sub>(part)</sub>                              | 736.8            | 503.2             | -                 | -                 | -            | -                | -               | -              |
| Hg(0)                                             | 76.7             | 21.3              | -                 | -                 | -            | -                | -               | -              |
| Hg(II) <sub>b</sub>                               | -43.0            | 5007.1            | -                 | -                 | -            | -                | -               | -              |
| Hg(II) <sub>a</sub>                               | 2005.4           | 10671.6           | -                 | -                 | -            | -                | -               | -              |
| <b>C1.8</b>                                       |                  |                   |                   |                   |              |                  |                 |                |
| Hg <sub>(part)</sub>                              | 1966.4           | -0.8              | -                 | -                 | -            | -                | -               | -              |
| Hg(0)                                             | 30.3             | 23.6              | -                 | -                 | -            | -                | -               | -              |
| Hg(II) <sub>b</sub>                               | -424.5           | 4015.9            | -                 | -                 | -            | -                | -               | -              |
| Hg(II) <sub>a</sub>                               | 6457.5           | 18986.3           | -                 | -                 | -            | -                | -               | -              |
| <b>Summary Statistics</b>                         |                  |                   |                   |                   |              |                  |                 |                |
| Mean                                              | 25% Breakthrough | 50 % Breakthrough | 75 % Breakthrough | Begin equilibrium | End Sorption | Begin Desorption | 50 % Desorption | End Desorption |
| Hg <sub>(part)</sub>                              | 1847.5           | 1054.2            | 948.4             | 2608.5            | 3393.7       | 2716.4           | 4509.5          | 354.8          |
| Hg(0)                                             | 41.7             | 20.5              | 13.5              | 23.0              | 11.4         | 10.6             | 10.1            | 3.3            |
| Hg(II) <sub>b</sub>                               | -1079.9          | 3224.5            | 2877.5            | 2492.7            | 2116.5       | -1843.9          | 775.9           | 197.9          |
| Hg(II) <sub>a</sub>                               | 8327.9           | 16252.7           | 25742.9           | 32583.0           | 34298.4      | 35717.3          | 16648.1         | 2112.3         |
| <b>Standard Deviation</b>                         |                  |                   |                   |                   |              |                  |                 |                |
| Hg <sub>(part)</sub>                              | 1067.9           | 1662.4            | 1817.8            | 822.9             | 3247.0       | 684.0            | 1517.4          | 149.4          |
| Hg(0)                                             | 15.7             | 4.1               | 6.8               | 6.3               | 2.7          | 0.6              | 0.8             | 0.8            |
| Hg(II) <sub>b</sub>                               | 927.5            | 1688.1            | 1614.0            | 1239.0            | 1652.5       | 900.8            | 916.5           | 10.9           |
| Hg(II) <sub>a</sub>                               | 4262.4           | 2915.8            | 3975.0            | 1627.8            | 3043.8       | 741.4            | 374.1           | 75.5           |

Table S4.3 Summary of percent species distribution in EXP2 (143.72 ± 6.17 mg L<sup>-1</sup>). Stock solution was measured (purged) for Hg(0) and the mean fraction of Hg(0) was 0.0051 ± 0.008 %.

| Experiment Duration<br>[min]                      | Sorption                |         |         |         |                         |         |         |                         |                                       |                       | Desorption            |                        |         |        |
|---------------------------------------------------|-------------------------|---------|---------|---------|-------------------------|---------|---------|-------------------------|---------------------------------------|-----------------------|-----------------------|------------------------|---------|--------|
|                                                   | 640                     | 815     | 1000    | 1120    | 1180                    | 1270    | 1360    | 1450                    | 1540                                  | 2035                  | 9290                  | 9700                   | 11020   | 15170  |
| Mean THg conc. in eluate<br>[µg L <sup>-1</sup> ] | 8381.1                  | 20279.2 | 32932.3 | 32135.3 | 37621.6                 | 47215.2 | 52939.8 | 61529.6                 | 64319.0                               | 94838.0               | 133889.9              | 79981.8                | 30877.0 | 7176.2 |
| Standard Deviation<br>[µg L <sup>-1</sup> ]       | 10551.8                 | 17215.3 | 19884.0 | 18026.7 | 16249.2                 | 15531.0 | 16775.5 | 14506.1                 | 12549.8                               | 6224.5                | 1388.9                | 1229.8                 | 1124.1  | 355.5  |
| <b>C2.1</b>                                       |                         |         |         |         |                         |         |         |                         |                                       |                       |                       |                        |         |        |
| Hg(II) <sub>P</sub>                               | -                       | -       | -       | -       | 13.7%                   | 45.1%   | -       | 19.5%                   | 16.6%                                 | 0.0%                  | 6.5%                  | 20.5%                  | 24.4%   | 25.5%  |
| Hg(0)                                             | -                       | -       | -       | -       | 0.0%                    | 0.1%    | -       | 0.0%                    | 0.0%                                  | 0.0%                  | 0.0%                  | 0.0%                   | 0.0%    | 0.1%   |
| Hg(II) <sub>b</sub>                               | -                       | -       | -       | -       | 12.4%                   | 8.1%    | -       | 16.2%                   | 14.9%                                 | 22.7%                 | 0.0%                  | 0.0%                   | 1.5%    | 1.6%   |
| Hg(II) <sub>a</sub>                               | -                       | -       | -       | -       | 73.8%                   | 46.7%   | -       | 64.3%                   | 68.4%                                 | 77.2%                 | 93.5%                 | 79.4%                  | 73.2%   | 72.8%  |
| <b>C2.2</b>                                       |                         |         |         |         |                         |         |         |                         |                                       |                       |                       |                        |         |        |
| Hg(II) <sub>P</sub>                               | -                       | -       | -       | -       | 20.8%                   | 26.5%   | -       | 5.0%                    | 8.4%                                  | 4.9%                  | 14.6%                 | 14.6%                  | 25.5%   | 23.3%  |
| Hg(0)                                             | -                       | -       | -       | -       | 0.0%                    | 0.1%    | -       | 0.0%                    | 0.1%                                  | 0.0%                  | 0.0%                  | 0.1%                   | 0.0%    | 0.1%   |
| Hg(II) <sub>b</sub>                               | -                       | -       | -       | -       | 14.1%                   | 7.3%    | -       | 20.8%                   | 26.7%                                 | 14.0%                 | 0.0%                  | 0.0%                   | 3.6%    | 2.6%   |
| Hg(II) <sub>a</sub>                               | -                       | -       | -       | -       | 65.1%                   | 66.0%   | -       | 74.2%                   | 64.7%                                 | 81.1%                 | 85.4%                 | 85.3%                  | 70.9%   | 74.1%  |
| <b>C2.3</b>                                       |                         |         |         |         |                         |         |         |                         |                                       |                       |                       |                        |         |        |
| Hg(II) <sub>P</sub>                               | -                       | -       | -       | -       | 14.0%                   | 47.2%   | -       | 16.5%                   | 26.6%                                 | 0.0%                  | 13.4%                 | 9.5%                   | 16.0%   | 26.4%  |
| Hg(0)                                             | -                       | -       | -       | -       | 0.1%                    | 0.1%    | -       | 0.1%                    | 0.1%                                  | 0.1%                  | 0.0%                  | 0.0%                   | 0.0%    | 0.1%   |
| Hg(II) <sub>b</sub>                               | -                       | -       | -       | -       | 16.3%                   | 8.2%    | -       | 16.1%                   | 17.2%                                 | 23.7%                 | 0.0%                  | 1.9%                   | 7.0%    | 3.2%   |
| Hg(II) <sub>a</sub>                               | -                       | -       | -       | -       | 69.7%                   | 44.6%   | -       | 67.3%                   | 56.1%                                 | 76.2%                 | 86.6%                 | 88.6%                  | 77.0%   | 70.4%  |
| <b>C2.4</b>                                       |                         |         |         |         |                         |         |         |                         |                                       |                       |                       |                        |         |        |
| Hg(II) <sub>P</sub>                               | 17.7%                   | -       | 10.7%   | -       | -                       | -       | -       | -                       | -                                     | -                     | -                     | -                      | -       | -      |
| Hg(0)                                             | 0.1%                    | -       | 0.0%    | -       | -                       | -       | -       | -                       | -                                     | -                     | -                     | -                      | -       | -      |
| Hg(II) <sub>b</sub>                               | 11.0%                   | -       | 11.3%   | -       | -                       | -       | -       | -                       | -                                     | -                     | -                     | -                      | -       | -      |
| Hg(II) <sub>a</sub>                               | 71.2%                   | -       | 78.0%   | -       | -                       | -       | -       | -                       | -                                     | -                     | -                     | -                      | -       | -      |
| <b>C2.5</b>                                       |                         |         |         |         |                         |         |         |                         |                                       |                       |                       |                        |         |        |
| Hg(II) <sub>P</sub>                               | 12.8%                   | -       | 9.5%    | -       | -                       | -       | -       | -                       | -                                     | -                     | -                     | -                      | -       | -      |
| Hg(0)                                             | 0.2%                    | -       | 0.0%    | -       | -                       | -       | -       | -                       | -                                     | -                     | -                     | -                      | -       | -      |
| Hg(II) <sub>b</sub>                               | 9.1%                    | -       | 8.9%    | -       | -                       | -       | -       | -                       | -                                     | -                     | -                     | -                      | -       | -      |
| Hg(II) <sub>a</sub>                               | 77.9%                   | -       | 80.9%   | -       | -                       | -       | -       | -                       | -                                     | -                     | -                     | -                      | -       | -      |
| <b>C2.6</b>                                       |                         |         |         |         |                         |         |         |                         |                                       |                       |                       |                        |         |        |
| Hg(II) <sub>P</sub>                               | -                       | 15.9%   | -       | 12.1%   | -                       | -       | 13.0%   | -                       | 14.0%                                 | -                     | 10.8%                 | -                      | -       | -      |
| Hg(0)                                             | -                       | 0.0%    | -       | 0.1%    | -                       | -       | 0.1%    | -                       | 0.1%                                  | -                     | 0.0%                  | -                      | -       | -      |
| Hg(II) <sub>b</sub>                               | -                       | 8.7%    | -       | 9.2%    | -                       | -       | 8.3%    | -                       | 20.3%                                 | -                     | 0.0%                  | -                      | -       | -      |
| Hg(II) <sub>a</sub>                               | -                       | 74.7%   | -       | 78.6%   | -                       | -       | 78.9%   | -                       | 65.6%                                 | -                     | 89.1%                 | -                      | -       | -      |
| <b>C2.7</b>                                       |                         |         |         |         |                         |         |         |                         |                                       |                       |                       |                        |         |        |
| Hg(II) <sub>P</sub>                               | -                       | -       | -       | 10.3%   | 0.0%                    | -       | 25.6%   | -                       | 9.2%                                  | 0.0%                  | 8.8%                  | -                      | -       | -      |
| Hg(0)                                             | -                       | -       | -       | 0.0%    | 0.0%                    | -       | 0.0%    | -                       | 0.0%                                  | 0.0%                  | 0.0%                  | -                      | -       | -      |
| Hg(II) <sub>b</sub>                               | -                       | -       | -       | 14.0%   | 23.6%                   | -       | 7.3%    | -                       | 17.0%                                 | 20.3%                 | 0.0%                  | -                      | -       | -      |
| Hg(II) <sub>a</sub>                               | -                       | -       | -       | 75.9%   | 76.4%                   | -       | 67.1%   | -                       | 73.7%                                 | 79.7%                 | 91.2%                 | -                      | -       | -      |
| <b>C2.8</b>                                       |                         |         |         |         |                         |         |         |                         |                                       |                       |                       |                        |         |        |
| Hg(II) <sub>P</sub>                               | -                       | 18.3%   | -       | 9.9%    | -                       | -       | 21.6%   | -                       | 3.5%                                  | 2.0%                  | 11.9%                 | -                      | -       | -      |
| Hg(0)                                             | -                       | 0.0%    | -       | 0.0%    | -                       | -       | 0.0%    | -                       | 0.0%                                  | 0.0%                  | 0.0%                  | -                      | -       | -      |
| Hg(II) <sub>b</sub>                               | -                       | 8.9%    | -       | 7.7%    | -                       | -       | 7.6%    | -                       | 16.1%                                 | 13.3%                 | 0.6%                  | -                      | -       | -      |
| Hg(II) <sub>a</sub>                               | -                       | 73.1%   | -       | 82.4%   | -                       | -       | 70.8%   | -                       | 80.3%                                 | 85.4%                 | 87.5%                 | -                      | -       | -      |
| <b>Mean</b>                                       |                         |         |         |         |                         |         |         |                         |                                       |                       |                       |                        |         |        |
|                                                   | <b>25% Breakthrough</b> |         |         |         | <b>50% Breakthrough</b> |         |         | <b>75% Breakthrough</b> | <b>End Sorption/ Begin Desorption</b> | <b>50% Desorption</b> | <b>75% Desorption</b> | <b>Ende Desorption</b> |         |        |
| Hg(II) <sub>P</sub>                               | -                       | -       | -       | -       | 20.0%                   | -       | -       | -                       | 10.1%                                 | 2.3%                  | 11.0%                 | 14.9%                  | 22.0%   | 25.1%  |
| Hg(0)                                             | -                       | -       | -       | -       | 0.1%                    | -       | -       | -                       | 0.0%                                  | 0.0%                  | 0.0%                  | 0.0%                   | 0.0%    | 0.1%   |
| Hg(II) <sub>b</sub>                               | -                       | -       | -       | -       | 12.0%                   | -       | -       | -                       | 18.9%                                 | 16.7%                 | 0.1%                  | 0.6%                   | 4.0%    | 2.5%   |
| Hg(II) <sub>a</sub>                               | -                       | -       | -       | -       | 67.9%                   | -       | -       | -                       | 70.9%                                 | 81.2%                 | 88.9%                 | 84.4%                  | 73.7%   | 72.4%  |
| <b>Standard Deviation</b>                         |                         |         |         |         |                         |         |         |                         |                                       |                       |                       |                        |         |        |
| Hg(II) <sub>P</sub>                               | -                       | -       | -       | -       | 13.6%                   | -       | -       | -                       | 8.9%                                  | 2.4%                  | 3.0%                  | 5.5%                   | 5.2%    | 1.6%   |
| Hg(0)                                             | -                       | -       | -       | -       | 0.0%                    | -       | -       | -                       | 0.0%                                  | 0.0%                  | 0.0%                  | 0.0%                   | 0.0%    | 0.0%   |
| Hg(II) <sub>b</sub>                               | -                       | -       | -       | -       | 5.9%                    | -       | -       | -                       | 6.8%                                  | 5.3%                  | 0.3%                  | 1.1%                   | 2.8%    | 0.8%   |
| Hg(II) <sub>a</sub>                               | -                       | -       | -       | -       | 10.1%                   | -       | -       | -                       | 6.0%                                  | 4.1%                  | 3.0%                  | 4.6%                   | 3.1%    | 1.9%   |

Table S4.4: Summary of species concentrations in EXP1 ( $143.72 \pm 6.17 \text{ mg L}^{-1}$ ). Values in red are negative concentrations caused by subtraction of two measured values. These are considered as zero and highlight why we consider these qualitative analyses. Stock solution was measured (purged) for Hg(0) and the mean concentration was  $7.3 \pm 1.1 \mu\text{g L}^{-1}$  ( $n = 3$ ).

| Experiment Duration<br>[min]                      | Sorption                                                                                                                                                                                                                                                                                                                                                                                                                                                                                                                                                                                                                                                                                                                                                                                                                                                                                                                                                                                                                                                                                                                                                                                                                         |         |         |         |                  |         |                  |                                |                |                |                 | Desorption |         |        |                      |                  |   |   |   |                  |   |                  |                                |                |                |                 |                      |       |       |   |   |        |   |      |        |        |         |         |        |        |       |     |                     |   |   |      |   |        |      |      |        |        |        |        |                     |      |                     |   |   |        |   |        |         |         |         |        |        |        |                     |       |   |   |   |         |   |   |         |         |          |         |         |        |
|---------------------------------------------------|----------------------------------------------------------------------------------------------------------------------------------------------------------------------------------------------------------------------------------------------------------------------------------------------------------------------------------------------------------------------------------------------------------------------------------------------------------------------------------------------------------------------------------------------------------------------------------------------------------------------------------------------------------------------------------------------------------------------------------------------------------------------------------------------------------------------------------------------------------------------------------------------------------------------------------------------------------------------------------------------------------------------------------------------------------------------------------------------------------------------------------------------------------------------------------------------------------------------------------|---------|---------|---------|------------------|---------|------------------|--------------------------------|----------------|----------------|-----------------|------------|---------|--------|----------------------|------------------|---|---|---|------------------|---|------------------|--------------------------------|----------------|----------------|-----------------|----------------------|-------|-------|---|---|--------|---|------|--------|--------|---------|---------|--------|--------|-------|-----|---------------------|---|---|------|---|--------|------|------|--------|--------|--------|--------|---------------------|------|---------------------|---|---|--------|---|--------|---------|---------|---------|--------|--------|--------|---------------------|-------|---|---|---|---------|---|---|---------|---------|----------|---------|---------|--------|
|                                                   | 640                                                                                                                                                                                                                                                                                                                                                                                                                                                                                                                                                                                                                                                                                                                                                                                                                                                                                                                                                                                                                                                                                                                                                                                                                              | 815     | 1000    | 1120    | 1180             | 1270    | 1360             | 1450                           | 1540           | 2035           | 9290            | 9700       | 11020   | 15170  |                      |                  |   |   |   |                  |   |                  |                                |                |                |                 |                      |       |       |   |   |        |   |      |        |        |         |         |        |        |       |     |                     |   |   |      |   |        |      |      |        |        |        |        |                     |      |                     |   |   |        |   |        |         |         |         |        |        |        |                     |       |   |   |   |         |   |   |         |         |          |         |         |        |
| Mean THg conc. in eluate [ $\mu\text{g L}^{-1}$ ] | 8381.1                                                                                                                                                                                                                                                                                                                                                                                                                                                                                                                                                                                                                                                                                                                                                                                                                                                                                                                                                                                                                                                                                                                                                                                                                           | 20279.2 | 32932.3 | 32135.3 | 37621.6          | 47215.2 | 52939.8          | 61529.6                        | 64319.0        | 94838.0        | 133889.9        | 79981.8    | 30877.0 | 7176.2 |                      |                  |   |   |   |                  |   |                  |                                |                |                |                 |                      |       |       |   |   |        |   |      |        |        |         |         |        |        |       |     |                     |   |   |      |   |        |      |      |        |        |        |        |                     |      |                     |   |   |        |   |        |         |         |         |        |        |        |                     |       |   |   |   |         |   |   |         |         |          |         |         |        |
| Standard Deviation<br>[ $\mu\text{g L}^{-1}$ ]    | 10551.8                                                                                                                                                                                                                                                                                                                                                                                                                                                                                                                                                                                                                                                                                                                                                                                                                                                                                                                                                                                                                                                                                                                                                                                                                          | 17215.3 | 19884.0 | 18026.7 | 16249.2          | 15531.0 | 16775.5          | 14506.1                        | 12549.8        | 6224.5         | 1388.9          | 1229.8     | 1124.1  | 355.5  |                      |                  |   |   |   |                  |   |                  |                                |                |                |                 |                      |       |       |   |   |        |   |      |        |        |         |         |        |        |       |     |                     |   |   |      |   |        |      |      |        |        |        |        |                     |      |                     |   |   |        |   |        |         |         |         |        |        |        |                     |       |   |   |   |         |   |   |         |         |          |         |         |        |
| <b>C2.1</b>                                       |                                                                                                                                                                                                                                                                                                                                                                                                                                                                                                                                                                                                                                                                                                                                                                                                                                                                                                                                                                                                                                                                                                                                                                                                                                  |         |         |         |                  |         |                  |                                |                |                |                 |            |         |        |                      |                  |   |   |   |                  |   |                  |                                |                |                |                 |                      |       |       |   |   |        |   |      |        |        |         |         |        |        |       |     |                     |   |   |      |   |        |      |      |        |        |        |        |                     |      |                     |   |   |        |   |        |         |         |         |        |        |        |                     |       |   |   |   |         |   |   |         |         |          |         |         |        |
| Hg <sub>(part)</sub>                              | -                                                                                                                                                                                                                                                                                                                                                                                                                                                                                                                                                                                                                                                                                                                                                                                                                                                                                                                                                                                                                                                                                                                                                                                                                                | -       | -       | -       | 4276.2           | 18185.3 | -                | 12145.2                        | 10175.9        | -120.4         | 8646.2          | 16372.3    | 7691.3  | 1812.3 |                      |                  |   |   |   |                  |   |                  |                                |                |                |                 |                      |       |       |   |   |        |   |      |        |        |         |         |        |        |       |     |                     |   |   |      |   |        |      |      |        |        |        |        |                     |      |                     |   |   |        |   |        |         |         |         |        |        |        |                     |       |   |   |   |         |   |   |         |         |          |         |         |        |
| Hg(0)                                             | -                                                                                                                                                                                                                                                                                                                                                                                                                                                                                                                                                                                                                                                                                                                                                                                                                                                                                                                                                                                                                                                                                                                                                                                                                                | -       | -       | -       | 5.0              | 23.3    | -                | 25.5                           | 21.8           | 19.3           | 24.2            | 21.3       | 8.0     | 7.4    |                      |                  |   |   |   |                  |   |                  |                                |                |                |                 |                      |       |       |   |   |        |   |      |        |        |         |         |        |        |       |     |                     |   |   |      |   |        |      |      |        |        |        |        |                     |      |                     |   |   |        |   |        |         |         |         |        |        |        |                     |       |   |   |   |         |   |   |         |         |          |         |         |        |
| Hg(II) <sub>b</sub>                               | -                                                                                                                                                                                                                                                                                                                                                                                                                                                                                                                                                                                                                                                                                                                                                                                                                                                                                                                                                                                                                                                                                                                                                                                                                                | -       | -       | -       | 3872.2           | 3270.5  | -                | 10091.3                        | 9136.3         | 22484.3        | -11913.4        | -585.7     | 464.5   | 115.3  |                      |                  |   |   |   |                  |   |                  |                                |                |                |                 |                      |       |       |   |   |        |   |      |        |        |         |         |        |        |       |     |                     |   |   |      |   |        |      |      |        |        |        |        |                     |      |                     |   |   |        |   |        |         |         |         |        |        |        |                     |       |   |   |   |         |   |   |         |         |          |         |         |        |
| Hg(II) <sub>a</sub>                               | -                                                                                                                                                                                                                                                                                                                                                                                                                                                                                                                                                                                                                                                                                                                                                                                                                                                                                                                                                                                                                                                                                                                                                                                                                                | -       | -       | -       | 23015.6          | 18823.2 | -                | 40070.2                        | 41918.1        | 76463.4        | 138402.6        | 63936.3    | 23028.3 | 5172.2 |                      |                  |   |   |   |                  |   |                  |                                |                |                |                 |                      |       |       |   |   |        |   |      |        |        |         |         |        |        |       |     |                     |   |   |      |   |        |      |      |        |        |        |        |                     |      |                     |   |   |        |   |        |         |         |         |        |        |        |                     |       |   |   |   |         |   |   |         |         |          |         |         |        |
| <b>C2.2</b>                                       |                                                                                                                                                                                                                                                                                                                                                                                                                                                                                                                                                                                                                                                                                                                                                                                                                                                                                                                                                                                                                                                                                                                                                                                                                                  |         |         |         |                  |         |                  |                                |                |                |                 |            |         |        |                      |                  |   |   |   |                  |   |                  |                                |                |                |                 |                      |       |       |   |   |        |   |      |        |        |         |         |        |        |       |     |                     |   |   |      |   |        |      |      |        |        |        |        |                     |      |                     |   |   |        |   |        |         |         |         |        |        |        |                     |       |   |   |   |         |   |   |         |         |          |         |         |        |
| Hg <sub>(part)</sub>                              | -                                                                                                                                                                                                                                                                                                                                                                                                                                                                                                                                                                                                                                                                                                                                                                                                                                                                                                                                                                                                                                                                                                                                                                                                                                | -       | -       | -       | 4348.1           | 11039.6 | -                | 3163.8                         | 5835.9         | 5025.8         | 19805.2         | 11895.6    | 7462.1  | 1576.9 |                      |                  |   |   |   |                  |   |                  |                                |                |                |                 |                      |       |       |   |   |        |   |      |        |        |         |         |        |        |       |     |                     |   |   |      |   |        |      |      |        |        |        |        |                     |      |                     |   |   |        |   |        |         |         |         |        |        |        |                     |       |   |   |   |         |   |   |         |         |          |         |         |        |
| Hg(0)                                             | -                                                                                                                                                                                                                                                                                                                                                                                                                                                                                                                                                                                                                                                                                                                                                                                                                                                                                                                                                                                                                                                                                                                                                                                                                                | -       | -       | -       | 4.3              | 40.3    | -                | 19.8                           | 62.0           | 44.9           | 25.8            | 75.9       | 13.4    | 5.8    |                      |                  |   |   |   |                  |   |                  |                                |                |                |                 |                      |       |       |   |   |        |   |      |        |        |         |         |        |        |       |     |                     |   |   |      |   |        |      |      |        |        |        |        |                     |      |                     |   |   |        |   |        |         |         |         |        |        |        |                     |       |   |   |   |         |   |   |         |         |          |         |         |        |
| Hg(II) <sub>b</sub>                               | -                                                                                                                                                                                                                                                                                                                                                                                                                                                                                                                                                                                                                                                                                                                                                                                                                                                                                                                                                                                                                                                                                                                                                                                                                                | -       | -       | -       | 2947.5           | 3053.2  | -                | 13265.3                        | 18519.3        | 14523.5        | -5579.3         | -596.3     | 1050.6  | 173.4  |                      |                  |   |   |   |                  |   |                  |                                |                |                |                 |                      |       |       |   |   |        |   |      |        |        |         |         |        |        |       |     |                     |   |   |      |   |        |      |      |        |        |        |        |                     |      |                     |   |   |        |   |        |         |         |         |        |        |        |                     |       |   |   |   |         |   |   |         |         |          |         |         |        |
| Hg(II) <sub>a</sub>                               | -                                                                                                                                                                                                                                                                                                                                                                                                                                                                                                                                                                                                                                                                                                                                                                                                                                                                                                                                                                                                                                                                                                                                                                                                                                | -       | -       | -       | 13630.2          | 27491.6 | -                | 47335.0                        | 44823.3        | 83870.7        | 121821.9        | 70217.4    | 20776.4 | 5023.1 |                      |                  |   |   |   |                  |   |                  |                                |                |                |                 |                      |       |       |   |   |        |   |      |        |        |         |         |        |        |       |     |                     |   |   |      |   |        |      |      |        |        |        |        |                     |      |                     |   |   |        |   |        |         |         |         |        |        |        |                     |       |   |   |   |         |   |   |         |         |          |         |         |        |
| <b>C2.3</b>                                       |                                                                                                                                                                                                                                                                                                                                                                                                                                                                                                                                                                                                                                                                                                                                                                                                                                                                                                                                                                                                                                                                                                                                                                                                                                  |         |         |         |                  |         |                  |                                |                |                |                 |            |         |        |                      |                  |   |   |   |                  |   |                  |                                |                |                |                 |                      |       |       |   |   |        |   |      |        |        |         |         |        |        |       |     |                     |   |   |      |   |        |      |      |        |        |        |        |                     |      |                     |   |   |        |   |        |         |         |         |        |        |        |                     |       |   |   |   |         |   |   |         |         |          |         |         |        |
| Hg <sub>(part)</sub>                              | -                                                                                                                                                                                                                                                                                                                                                                                                                                                                                                                                                                                                                                                                                                                                                                                                                                                                                                                                                                                                                                                                                                                                                                                                                                | -       | -       | -       | 2631.6           | 11268.9 | -                | 5721.0                         | 10863.3        | -2332.8        | 17824.4         | 7501.2     | 5081.3  | 2017.0 |                      |                  |   |   |   |                  |   |                  |                                |                |                |                 |                      |       |       |   |   |        |   |      |        |        |         |         |        |        |       |     |                     |   |   |      |   |        |      |      |        |        |        |        |                     |      |                     |   |   |        |   |        |         |         |         |        |        |        |                     |       |   |   |   |         |   |   |         |         |          |         |         |        |
| Hg(0)                                             | -                                                                                                                                                                                                                                                                                                                                                                                                                                                                                                                                                                                                                                                                                                                                                                                                                                                                                                                                                                                                                                                                                                                                                                                                                                | -       | -       | -       | 10.2             | 26.3    | -                | 17.5                           | 35.0           | 43.6           | 22.3            | 14.5       | 13.3    | 5.4    |                      |                  |   |   |   |                  |   |                  |                                |                |                |                 |                      |       |       |   |   |        |   |      |        |        |         |         |        |        |       |     |                     |   |   |      |   |        |      |      |        |        |        |        |                     |      |                     |   |   |        |   |        |         |         |         |        |        |        |                     |       |   |   |   |         |   |   |         |         |          |         |         |        |
| Hg(II) <sub>b</sub>                               | -                                                                                                                                                                                                                                                                                                                                                                                                                                                                                                                                                                                                                                                                                                                                                                                                                                                                                                                                                                                                                                                                                                                                                                                                                                | -       | -       | -       | 3054.9           | 1948.6  | -                | 5576.1                         | 7041.1         | 20558.0        | -6508.7         | 1478.5     | 2219.5  | 242.1  |                      |                  |   |   |   |                  |   |                  |                                |                |                |                 |                      |       |       |   |   |        |   |      |        |        |         |         |        |        |       |     |                     |   |   |      |   |        |      |      |        |        |        |        |                     |      |                     |   |   |        |   |        |         |         |         |        |        |        |                     |       |   |   |   |         |   |   |         |         |          |         |         |        |
| Hg(II) <sub>a</sub>                               | -                                                                                                                                                                                                                                                                                                                                                                                                                                                                                                                                                                                                                                                                                                                                                                                                                                                                                                                                                                                                                                                                                                                                                                                                                                | -       | -       | -       | 13091.8          | 10656.3 | -                | 23297.9                        | 22932.9        | 68403.5        | 121825.4        | 69614.2    | 24540.2 | 5377.3 |                      |                  |   |   |   |                  |   |                  |                                |                |                |                 |                      |       |       |   |   |        |   |      |        |        |         |         |        |        |       |     |                     |   |   |      |   |        |      |      |        |        |        |        |                     |      |                     |   |   |        |   |        |         |         |         |        |        |        |                     |       |   |   |   |         |   |   |         |         |          |         |         |        |
| <b>C2.4</b>                                       |                                                                                                                                                                                                                                                                                                                                                                                                                                                                                                                                                                                                                                                                                                                                                                                                                                                                                                                                                                                                                                                                                                                                                                                                                                  |         |         |         |                  |         |                  |                                |                |                |                 |            |         |        |                      |                  |   |   |   |                  |   |                  |                                |                |                |                 |                      |       |       |   |   |        |   |      |        |        |         |         |        |        |       |     |                     |   |   |      |   |        |      |      |        |        |        |        |                     |      |                     |   |   |        |   |        |         |         |         |        |        |        |                     |       |   |   |   |         |   |   |         |         |          |         |         |        |
| Hg <sub>(part)</sub>                              | 5501.0                                                                                                                                                                                                                                                                                                                                                                                                                                                                                                                                                                                                                                                                                                                                                                                                                                                                                                                                                                                                                                                                                                                                                                                                                           | -       | 5856.2  | -       | -                | -       | -                | -                              | -              | -              | -               | -          | -       | -      |                      |                  |   |   |   |                  |   |                  |                                |                |                |                 |                      |       |       |   |   |        |   |      |        |        |         |         |        |        |       |     |                     |   |   |      |   |        |      |      |        |        |        |        |                     |      |                     |   |   |        |   |        |         |         |         |        |        |        |                     |       |   |   |   |         |   |   |         |         |          |         |         |        |
| Hg(0)                                             | 39.7                                                                                                                                                                                                                                                                                                                                                                                                                                                                                                                                                                                                                                                                                                                                                                                                                                                                                                                                                                                                                                                                                                                                                                                                                             | -       | 11.5    | -       | -                | -       | -                | -                              | -              | -              | -               | -          | -       | -      |                      |                  |   |   |   |                  |   |                  |                                |                |                |                 |                      |       |       |   |   |        |   |      |        |        |         |         |        |        |       |     |                     |   |   |      |   |        |      |      |        |        |        |        |                     |      |                     |   |   |        |   |        |         |         |         |        |        |        |                     |       |   |   |   |         |   |   |         |         |          |         |         |        |
| Hg(II) <sub>b</sub>                               | 3428.1                                                                                                                                                                                                                                                                                                                                                                                                                                                                                                                                                                                                                                                                                                                                                                                                                                                                                                                                                                                                                                                                                                                                                                                                                           | -       | 6201.7  | -       | -                | -       | -                | -                              | -              | -              | -               | -          | -       | -      |                      |                  |   |   |   |                  |   |                  |                                |                |                |                 |                      |       |       |   |   |        |   |      |        |        |         |         |        |        |       |     |                     |   |   |      |   |        |      |      |        |        |        |        |                     |      |                     |   |   |        |   |        |         |         |         |        |        |        |                     |       |   |   |   |         |   |   |         |         |          |         |         |        |
| Hg(II) <sub>a</sub>                               | 22146.4                                                                                                                                                                                                                                                                                                                                                                                                                                                                                                                                                                                                                                                                                                                                                                                                                                                                                                                                                                                                                                                                                                                                                                                                                          | -       | 42912.6 | -       | -                | -       | -                | -                              | -              | -              | -               | -          | -       | -      |                      |                  |   |   |   |                  |   |                  |                                |                |                |                 |                      |       |       |   |   |        |   |      |        |        |         |         |        |        |       |     |                     |   |   |      |   |        |      |      |        |        |        |        |                     |      |                     |   |   |        |   |        |         |         |         |        |        |        |                     |       |   |   |   |         |   |   |         |         |          |         |         |        |
| <b>C2.5</b>                                       |                                                                                                                                                                                                                                                                                                                                                                                                                                                                                                                                                                                                                                                                                                                                                                                                                                                                                                                                                                                                                                                                                                                                                                                                                                  |         |         |         |                  |         |                  |                                |                |                |                 |            |         |        |                      |                  |   |   |   |                  |   |                  |                                |                |                |                 |                      |       |       |   |   |        |   |      |        |        |         |         |        |        |       |     |                     |   |   |      |   |        |      |      |        |        |        |        |                     |      |                     |   |   |        |   |        |         |         |         |        |        |        |                     |       |   |   |   |         |   |   |         |         |          |         |         |        |
| Hg <sub>(part)</sub>                              | 2446.9                                                                                                                                                                                                                                                                                                                                                                                                                                                                                                                                                                                                                                                                                                                                                                                                                                                                                                                                                                                                                                                                                                                                                                                                                           | -       | 5020.3  | -       | -                | -       | -                | -                              | -              | -              | -               | -          | -       | -      |                      |                  |   |   |   |                  |   |                  |                                |                |                |                 |                      |       |       |   |   |        |   |      |        |        |         |         |        |        |       |     |                     |   |   |      |   |        |      |      |        |        |        |        |                     |      |                     |   |   |        |   |        |         |         |         |        |        |        |                     |       |   |   |   |         |   |   |         |         |          |         |         |        |
| Hg(0)                                             | 33.9                                                                                                                                                                                                                                                                                                                                                                                                                                                                                                                                                                                                                                                                                                                                                                                                                                                                                                                                                                                                                                                                                                                                                                                                                             | -       | 6.4     | -       | -                | -       | -                | -                              | -              | -              | -               | -          | -       | -      |                      |                  |   |   |   |                  |   |                  |                                |                |                |                 |                      |       |       |   |   |        |   |      |        |        |         |         |        |        |       |     |                     |   |   |      |   |        |      |      |        |        |        |        |                     |      |                     |   |   |        |   |        |         |         |         |        |        |        |                     |       |   |   |   |         |   |   |         |         |          |         |         |        |
| Hg(II) <sub>b</sub>                               | 1741.6                                                                                                                                                                                                                                                                                                                                                                                                                                                                                                                                                                                                                                                                                                                                                                                                                                                                                                                                                                                                                                                                                                                                                                                                                           | -       | 4684.4  | -       | -                | -       | -                | -                              | -              | -              | -               | -          | -       | -      |                      |                  |   |   |   |                  |   |                  |                                |                |                |                 |                      |       |       |   |   |        |   |      |        |        |         |         |        |        |       |     |                     |   |   |      |   |        |      |      |        |        |        |        |                     |      |                     |   |   |        |   |        |         |         |         |        |        |        |                     |       |   |   |   |         |   |   |         |         |          |         |         |        |
| Hg(II) <sub>a</sub>                               | 14903.1                                                                                                                                                                                                                                                                                                                                                                                                                                                                                                                                                                                                                                                                                                                                                                                                                                                                                                                                                                                                                                                                                                                                                                                                                          | -       | 42539.7 | -       | -                | -       | -                | -                              | -              | -              | -               | -          | -       | -      |                      |                  |   |   |   |                  |   |                  |                                |                |                |                 |                      |       |       |   |   |        |   |      |        |        |         |         |        |        |       |     |                     |   |   |      |   |        |      |      |        |        |        |        |                     |      |                     |   |   |        |   |        |         |         |         |        |        |        |                     |       |   |   |   |         |   |   |         |         |          |         |         |        |
| <b>C2.6</b>                                       |                                                                                                                                                                                                                                                                                                                                                                                                                                                                                                                                                                                                                                                                                                                                                                                                                                                                                                                                                                                                                                                                                                                                                                                                                                  |         |         |         |                  |         |                  |                                |                |                |                 |            |         |        |                      |                  |   |   |   |                  |   |                  |                                |                |                |                 |                      |       |       |   |   |        |   |      |        |        |         |         |        |        |       |     |                     |   |   |      |   |        |      |      |        |        |        |        |                     |      |                     |   |   |        |   |        |         |         |         |        |        |        |                     |       |   |   |   |         |   |   |         |         |          |         |         |        |
| Hg <sub>(part)</sub>                              | -                                                                                                                                                                                                                                                                                                                                                                                                                                                                                                                                                                                                                                                                                                                                                                                                                                                                                                                                                                                                                                                                                                                                                                                                                                | 4748.5  | -       | 6391.4  | -                | -       | 9065.5           | -                              | 10324.2        | -2302.3        | 14620.9         | -          | -       | -      |                      |                  |   |   |   |                  |   |                  |                                |                |                |                 |                      |       |       |   |   |        |   |      |        |        |         |         |        |        |       |     |                     |   |   |      |   |        |      |      |        |        |        |        |                     |      |                     |   |   |        |   |        |         |         |         |        |        |        |                     |       |   |   |   |         |   |   |         |         |          |         |         |        |
| Hg(0)                                             | -                                                                                                                                                                                                                                                                                                                                                                                                                                                                                                                                                                                                                                                                                                                                                                                                                                                                                                                                                                                                                                                                                                                                                                                                                                | 14.8    | -       | 31.0    | -                | -       | 33.3             | -                              | 55.6           | 50.2           | 31.5            | -          | -       | -      |                      |                  |   |   |   |                  |   |                  |                                |                |                |                 |                      |       |       |   |   |        |   |      |        |        |         |         |        |        |       |     |                     |   |   |      |   |        |      |      |        |        |        |        |                     |      |                     |   |   |        |   |        |         |         |         |        |        |        |                     |       |   |   |   |         |   |   |         |         |          |         |         |        |
| Hg(II) <sub>b</sub>                               | -                                                                                                                                                                                                                                                                                                                                                                                                                                                                                                                                                                                                                                                                                                                                                                                                                                                                                                                                                                                                                                                                                                                                                                                                                                | 2594.9  | -       | 4876.4  | -                | -       | 5760.9           | -                              | 14927.7        | -19530.5       | -6599.4         | -          | -       | -      |                      |                  |   |   |   |                  |   |                  |                                |                |                |                 |                      |       |       |   |   |        |   |      |        |        |         |         |        |        |       |     |                     |   |   |      |   |        |      |      |        |        |        |        |                     |      |                     |   |   |        |   |        |         |         |         |        |        |        |                     |       |   |   |   |         |   |   |         |         |          |         |         |        |
| Hg(II) <sub>a</sub>                               | -                                                                                                                                                                                                                                                                                                                                                                                                                                                                                                                                                                                                                                                                                                                                                                                                                                                                                                                                                                                                                                                                                                                                                                                                                                | 22347.1 | -       | 41527.8 | -                | -       | 54839.0          | -                              | 48206.2        | 116799.9       | 126886.1        | -          | -       | -      |                      |                  |   |   |   |                  |   |                  |                                |                |                |                 |                      |       |       |   |   |        |   |      |        |        |         |         |        |        |       |     |                     |   |   |      |   |        |      |      |        |        |        |        |                     |      |                     |   |   |        |   |        |         |         |         |        |        |        |                     |       |   |   |   |         |   |   |         |         |          |         |         |        |
| <b>C2.7</b>                                       |                                                                                                                                                                                                                                                                                                                                                                                                                                                                                                                                                                                                                                                                                                                                                                                                                                                                                                                                                                                                                                                                                                                                                                                                                                  |         |         |         |                  |         |                  |                                |                |                |                 |            |         |        |                      |                  |   |   |   |                  |   |                  |                                |                |                |                 |                      |       |       |   |   |        |   |      |        |        |         |         |        |        |       |     |                     |   |   |      |   |        |      |      |        |        |        |        |                     |      |                     |   |   |        |   |        |         |         |         |        |        |        |                     |       |   |   |   |         |   |   |         |         |          |         |         |        |
| Hg <sub>(part)</sub>                              | -                                                                                                                                                                                                                                                                                                                                                                                                                                                                                                                                                                                                                                                                                                                                                                                                                                                                                                                                                                                                                                                                                                                                                                                                                                | -       | -       | 3345.9  | -641.2           | -       | 13150.7          | -                              | 5582.6         | -5987.7        | 11581.4         | -          | -       | -      |                      |                  |   |   |   |                  |   |                  |                                |                |                |                 |                      |       |       |   |   |        |   |      |        |        |         |         |        |        |       |     |                     |   |   |      |   |        |      |      |        |        |        |        |                     |      |                     |   |   |        |   |        |         |         |         |        |        |        |                     |       |   |   |   |         |   |   |         |         |          |         |         |        |
| Hg(0)                                             | -                                                                                                                                                                                                                                                                                                                                                                                                                                                                                                                                                                                                                                                                                                                                                                                                                                                                                                                                                                                                                                                                                                                                                                                                                                | -       | -       | 8.1     | 6.9              | -       | 13.9             | -                              | 21.8           | 26.1           | 25.2            | -          | -       | -      |                      |                  |   |   |   |                  |   |                  |                                |                |                |                 |                      |       |       |   |   |        |   |      |        |        |         |         |        |        |       |     |                     |   |   |      |   |        |      |      |        |        |        |        |                     |      |                     |   |   |        |   |        |         |         |         |        |        |        |                     |       |   |   |   |         |   |   |         |         |          |         |         |        |
| Hg(II) <sub>b</sub>                               | -                                                                                                                                                                                                                                                                                                                                                                                                                                                                                                                                                                                                                                                                                                                                                                                                                                                                                                                                                                                                                                                                                                                                                                                                                                | -       | -       | 4550.1  | 8785.7           | -       | 3767.1           | -                              | 10284.2        | 17696.7        | -2932.2         | -          | -       | -      |                      |                  |   |   |   |                  |   |                  |                                |                |                |                 |                      |       |       |   |   |        |   |      |        |        |         |         |        |        |       |     |                     |   |   |      |   |        |      |      |        |        |        |        |                     |      |                     |   |   |        |   |        |         |         |         |        |        |        |                     |       |   |   |   |         |   |   |         |         |          |         |         |        |
| Hg(II) <sub>a</sub>                               | -                                                                                                                                                                                                                                                                                                                                                                                                                                                                                                                                                                                                                                                                                                                                                                                                                                                                                                                                                                                                                                                                                                                                                                                                                                | -       | -       | 24662.9 | 29110.2          | -       | 34466.9          | -                              | 44623.5        | 75505.6        | 122948.0        | -          | -       | -      |                      |                  |   |   |   |                  |   |                  |                                |                |                |                 |                      |       |       |   |   |        |   |      |        |        |         |         |        |        |       |     |                     |   |   |      |   |        |      |      |        |        |        |        |                     |      |                     |   |   |        |   |        |         |         |         |        |        |        |                     |       |   |   |   |         |   |   |         |         |          |         |         |        |
| <b>C2.8</b>                                       |                                                                                                                                                                                                                                                                                                                                                                                                                                                                                                                                                                                                                                                                                                                                                                                                                                                                                                                                                                                                                                                                                                                                                                                                                                  |         |         |         |                  |         |                  |                                |                |                |                 |            |         |        |                      |                  |   |   |   |                  |   |                  |                                |                |                |                 |                      |       |       |   |   |        |   |      |        |        |         |         |        |        |       |     |                     |   |   |      |   |        |      |      |        |        |        |        |                     |      |                     |   |   |        |   |        |         |         |         |        |        |        |                     |       |   |   |   |         |   |   |         |         |          |         |         |        |
| Hg <sub>(part)</sub>                              | -                                                                                                                                                                                                                                                                                                                                                                                                                                                                                                                                                                                                                                                                                                                                                                                                                                                                                                                                                                                                                                                                                                                                                                                                                                | 6513.3  | -       | 5688.5  | -                | -       | 16951.9          | -                              | 2856.6         | 2023.9         | 15869.8         | -          | -       | -      |                      |                  |   |   |   |                  |   |                  |                                |                |                |                 |                      |       |       |   |   |        |   |      |        |        |         |         |        |        |       |     |                     |   |   |      |   |        |      |      |        |        |        |        |                     |      |                     |   |   |        |   |        |         |         |         |        |        |        |                     |       |   |   |   |         |   |   |         |         |          |         |         |        |
| Hg(0)                                             | -                                                                                                                                                                                                                                                                                                                                                                                                                                                                                                                                                                                                                                                                                                                                                                                                                                                                                                                                                                                                                                                                                                                                                                                                                                | 8.2     | -       | 10.9    | -                | -       | 13.5             | -                              | 17.8           | 17.9           | 28.0            | -          | -       | -      |                      |                  |   |   |   |                  |   |                  |                                |                |                |                 |                      |       |       |   |   |        |   |      |        |        |         |         |        |        |       |     |                     |   |   |      |   |        |      |      |        |        |        |        |                     |      |                     |   |   |        |   |        |         |         |         |        |        |        |                     |       |   |   |   |         |   |   |         |         |          |         |         |        |
| Hg(II) <sub>b</sub>                               | -                                                                                                                                                                                                                                                                                                                                                                                                                                                                                                                                                                                                                                                                                                                                                                                                                                                                                                                                                                                                                                                                                                                                                                                                                                | 3168.0  | -       | 4432.9  | -                | -       | 5922.5           | -                              | 12967.6        | 11220.5        | 866.0           | -          | -       | -      |                      |                  |   |   |   |                  |   |                  |                                |                |                |                 |                      |       |       |   |   |        |   |      |        |        |         |         |        |        |       |     |                     |   |   |      |   |        |      |      |        |        |        |        |                     |      |                     |   |   |        |   |        |         |         |         |        |        |        |                     |       |   |   |   |         |   |   |         |         |          |         |         |        |
| Hg(II) <sub>a</sub>                               | -                                                                                                                                                                                                                                                                                                                                                                                                                                                                                                                                                                                                                                                                                                                                                                                                                                                                                                                                                                                                                                                                                                                                                                                                                                | 26040.7 | -       | 47317.7 | -                | -       | 55443.2          | -                              | 64681.2        | 84475.1        | 116941.1        | -          | -       | -      |                      |                  |   |   |   |                  |   |                  |                                |                |                |                 |                      |       |       |   |   |        |   |      |        |        |         |         |        |        |       |     |                     |   |   |      |   |        |      |      |        |        |        |        |                     |      |                     |   |   |        |   |        |         |         |         |        |        |        |                     |       |   |   |   |         |   |   |         |         |          |         |         |        |
| <b>Mean</b>                                       | <table style="width: 100%; border-collapse: collapse;"> <thead> <tr> <th></th> <th colspan="4">25% Breakthrough</th> <th colspan="2">50% Breakthrough</th> <th>75% Breakthrough</th> <th>End Sorption/ Begin Desorption</th> <th>50% Desorption</th> <th>75% Desorption</th> <th>Ende Desorption</th> </tr> </thead> <tbody> <tr> <td>Hg<sub>(part)</sub></td> <td>-</td> <td>-</td> <td>-</td> <td>-</td> <td>7295.3</td> <td>-</td> <td>-</td> <td>5827.9</td> <td>2309.8</td> <td>14724.7</td> <td>11923.0</td> <td>6744.9</td> <td>1802.1</td> </tr> <tr> <td>Hg(0)</td> <td>-</td> <td>-</td> <td>-</td> <td>-</td> <td>21.5</td> <td>-</td> <td>-</td> <td>37.1</td> <td>27.4</td> <td>26.2</td> <td>37.3</td> <td>11.5</td> <td>6.2</td> </tr> <tr> <td>Hg(II)<sub>b</sub></td> <td>-</td> <td>-</td> <td>-</td> <td>-</td> <td>4268.1</td> <td>-</td> <td>-</td> <td>14460.1</td> <td>16076.1</td> <td>-5444.5</td> <td>98.8</td> <td>1244.9</td> <td>177.0</td> </tr> <tr> <td>Hg(II)<sub>a</sub></td> <td>-</td> <td>-</td> <td>-</td> <td>-</td> <td>24179.6</td> <td>-</td> <td>-</td> <td>55716.7</td> <td>81603.1</td> <td>124804.2</td> <td>67922.6</td> <td>22781.6</td> <td>5190.9</td> </tr> </tbody> </table> |         |         |         |                  |         |                  |                                |                |                |                 |            |         |        |                      | 25% Breakthrough |   |   |   | 50% Breakthrough |   | 75% Breakthrough | End Sorption/ Begin Desorption | 50% Desorption | 75% Desorption | Ende Desorption | Hg <sub>(part)</sub> | -     | -     | - | - | 7295.3 | - | -    | 5827.9 | 2309.8 | 14724.7 | 11923.0 | 6744.9 | 1802.1 | Hg(0) | -   | -                   | - | - | 21.5 | - | -      | 37.1 | 27.4 | 26.2   | 37.3   | 11.5   | 6.2    | Hg(II) <sub>b</sub> | -    | -                   | - | - | 4268.1 | - | -      | 14460.1 | 16076.1 | -5444.5 | 98.8   | 1244.9 | 177.0  | Hg(II) <sub>a</sub> | -     | - | - | - | 24179.6 | - | - | 55716.7 | 81603.1 | 124804.2 | 67922.6 | 22781.6 | 5190.9 |
|                                                   | 25% Breakthrough                                                                                                                                                                                                                                                                                                                                                                                                                                                                                                                                                                                                                                                                                                                                                                                                                                                                                                                                                                                                                                                                                                                                                                                                                 |         |         |         | 50% Breakthrough |         | 75% Breakthrough | End Sorption/ Begin Desorption | 50% Desorption | 75% Desorption | Ende Desorption |            |         |        |                      |                  |   |   |   |                  |   |                  |                                |                |                |                 |                      |       |       |   |   |        |   |      |        |        |         |         |        |        |       |     |                     |   |   |      |   |        |      |      |        |        |        |        |                     |      |                     |   |   |        |   |        |         |         |         |        |        |        |                     |       |   |   |   |         |   |   |         |         |          |         |         |        |
| Hg <sub>(part)</sub>                              | -                                                                                                                                                                                                                                                                                                                                                                                                                                                                                                                                                                                                                                                                                                                                                                                                                                                                                                                                                                                                                                                                                                                                                                                                                                | -       | -       | -       | 7295.3           | -       | -                | 5827.9                         | 2309.8         | 14724.7        | 11923.0         | 6744.9     | 1802.1  |        |                      |                  |   |   |   |                  |   |                  |                                |                |                |                 |                      |       |       |   |   |        |   |      |        |        |         |         |        |        |       |     |                     |   |   |      |   |        |      |      |        |        |        |        |                     |      |                     |   |   |        |   |        |         |         |         |        |        |        |                     |       |   |   |   |         |   |   |         |         |          |         |         |        |
| Hg(0)                                             | -                                                                                                                                                                                                                                                                                                                                                                                                                                                                                                                                                                                                                                                                                                                                                                                                                                                                                                                                                                                                                                                                                                                                                                                                                                | -       | -       | -       | 21.5             | -       | -                | 37.1                           | 27.4           | 26.2           | 37.3            | 11.5       | 6.2     |        |                      |                  |   |   |   |                  |   |                  |                                |                |                |                 |                      |       |       |   |   |        |   |      |        |        |         |         |        |        |       |     |                     |   |   |      |   |        |      |      |        |        |        |        |                     |      |                     |   |   |        |   |        |         |         |         |        |        |        |                     |       |   |   |   |         |   |   |         |         |          |         |         |        |
| Hg(II) <sub>b</sub>                               | -                                                                                                                                                                                                                                                                                                                                                                                                                                                                                                                                                                                                                                                                                                                                                                                                                                                                                                                                                                                                                                                                                                                                                                                                                                | -       | -       | -       | 4268.1           | -       | -                | 14460.1                        | 16076.1        | -5444.5        | 98.8            | 1244.9     | 177.0   |        |                      |                  |   |   |   |                  |   |                  |                                |                |                |                 |                      |       |       |   |   |        |   |      |        |        |         |         |        |        |       |     |                     |   |   |      |   |        |      |      |        |        |        |        |                     |      |                     |   |   |        |   |        |         |         |         |        |        |        |                     |       |   |   |   |         |   |   |         |         |          |         |         |        |
| Hg(II) <sub>a</sub>                               | -                                                                                                                                                                                                                                                                                                                                                                                                                                                                                                                                                                                                                                                                                                                                                                                                                                                                                                                                                                                                                                                                                                                                                                                                                                | -       | -       | -       | 24179.6          | -       | -                | 55716.7                        | 81603.1        | 124804.2       | 67922.6         | 22781.6    | 5190.9  |        |                      |                  |   |   |   |                  |   |                  |                                |                |                |                 |                      |       |       |   |   |        |   |      |        |        |         |         |        |        |       |     |                     |   |   |      |   |        |      |      |        |        |        |        |                     |      |                     |   |   |        |   |        |         |         |         |        |        |        |                     |       |   |   |   |         |   |   |         |         |          |         |         |        |
| <b>Standard Deviation</b>                         | <table style="width: 100%; border-collapse: collapse;"> <tbody> <tr> <td>Hg<sub>(part)</sub></td> <td>-</td> <td>-</td> <td>-</td> <td>-</td> <td>5893.4</td> <td>-</td> <td>-</td> <td>8591.5</td> <td>2585.0</td> <td>4088.3</td> <td>4435.6</td> <td>1445.3</td> <td>220.3</td> </tr> <tr> <td>Hg(0)</td> <td>-</td> <td>-</td> <td>-</td> <td>-</td> <td>13.8</td> <td>-</td> <td>-</td> <td>19.6</td> <td>15.2</td> <td>3.2</td> <td>33.7</td> <td>3.1</td> <td>1.0</td> </tr> <tr> <td>Hg(II)<sub>b</sub></td> <td>-</td> <td>-</td> <td>-</td> <td>-</td> <td>2210.1</td> <td>-</td> <td>-</td> <td>5754.8</td> <td>5790.2</td> <td>4253.6</td> <td>1194.8</td> <td>893.5</td> <td>63.5</td> </tr> <tr> <td>Hg(II)<sub>a</sub></td> <td>-</td> <td>-</td> <td>-</td> <td>-</td> <td>3552.1</td> <td>-</td> <td>-</td> <td>13550.7</td> <td>4461.4</td> <td>7379.6</td> <td>3465.4</td> <td>1894.0</td> <td>177.8</td> </tr> </tbody> </table>                                                                                                                                                                                                                                                                             |         |         |         |                  |         |                  |                                |                |                |                 |            |         |        | Hg <sub>(part)</sub> | -                | - | - | - | 5893.4           | - | -                | 8591.5                         | 2585.0         | 4088.3         | 4435.6          | 1445.3               | 220.3 | Hg(0) | - | - | -      | - | 13.8 | -      | -      | 19.6    | 15.2    | 3.2    | 33.7   | 3.1   | 1.0 | Hg(II) <sub>b</sub> | - | - | -    | - | 2210.1 | -    | -    | 5754.8 | 5790.2 | 4253.6 | 1194.8 | 893.5               | 63.5 | Hg(II) <sub>a</sub> | - | - | -      | - | 3552.1 | -       | -       | 13550.7 | 4461.4 | 7379.6 | 3465.4 | 1894.0              | 177.8 |   |   |   |         |   |   |         |         |          |         |         |        |
| Hg <sub>(part)</sub>                              | -                                                                                                                                                                                                                                                                                                                                                                                                                                                                                                                                                                                                                                                                                                                                                                                                                                                                                                                                                                                                                                                                                                                                                                                                                                | -       | -       | -       | 5893.4           | -       | -                | 8591.5                         | 2585.0         | 4088.3         | 4435.6          | 1445.3     | 220.3   |        |                      |                  |   |   |   |                  |   |                  |                                |                |                |                 |                      |       |       |   |   |        |   |      |        |        |         |         |        |        |       |     |                     |   |   |      |   |        |      |      |        |        |        |        |                     |      |                     |   |   |        |   |        |         |         |         |        |        |        |                     |       |   |   |   |         |   |   |         |         |          |         |         |        |
| Hg(0)                                             | -                                                                                                                                                                                                                                                                                                                                                                                                                                                                                                                                                                                                                                                                                                                                                                                                                                                                                                                                                                                                                                                                                                                                                                                                                                | -       | -       | -       | 13.8             | -       | -                | 19.6                           | 15.2           | 3.2            | 33.7            | 3.1        | 1.0     |        |                      |                  |   |   |   |                  |   |                  |                                |                |                |                 |                      |       |       |   |   |        |   |      |        |        |         |         |        |        |       |     |                     |   |   |      |   |        |      |      |        |        |        |        |                     |      |                     |   |   |        |   |        |         |         |         |        |        |        |                     |       |   |   |   |         |   |   |         |         |          |         |         |        |
| Hg(II) <sub>b</sub>                               | -                                                                                                                                                                                                                                                                                                                                                                                                                                                                                                                                                                                                                                                                                                                                                                                                                                                                                                                                                                                                                                                                                                                                                                                                                                | -       | -       | -       | 2210.1           | -       | -                | 5754.8                         | 5790.2         | 4253.6         | 1194.8          | 893.5      | 63.5    |        |                      |                  |   |   |   |                  |   |                  |                                |                |                |                 |                      |       |       |   |   |        |   |      |        |        |         |         |        |        |       |     |                     |   |   |      |   |        |      |      |        |        |        |        |                     |      |                     |   |   |        |   |        |         |         |         |        |        |        |                     |       |   |   |   |         |   |   |         |         |          |         |         |        |
| Hg(II) <sub>a</sub>                               | -                                                                                                                                                                                                                                                                                                                                                                                                                                                                                                                                                                                                                                                                                                                                                                                                                                                                                                                                                                                                                                                                                                                                                                                                                                | -       | -       | -       | 3552.1           | -       | -                | 13550.7                        | 4461.4         | 7379.6         | 3465.4          | 1894.0     | 177.8   |        |                      |                  |   |   |   |                  |   |                  |                                |                |                |                 |                      |       |       |   |   |        |   |      |        |        |         |         |        |        |       |     |                     |   |   |      |   |        |      |      |        |        |        |        |                     |      |                     |   |   |        |   |        |         |         |         |        |        |        |                     |       |   |   |   |         |   |   |         |         |          |         |         |        |

## S5. Liquid-phase THg concentrations over time across all columns

Table S5.1: Summary of the measured THg concentrations for each column at the different times after the start of the sorption and desorption experiments and the corresponding volume of contaminated solution flowed through (EXP1,  $46.1 \pm 1.1 \text{ mg L}^{-1}$ ).

| Time<br>[min] | C1.1                                           |                                                       | C1.2                                           |                                                       | C1.3                                           |                                                       | C1.4                                           |                                                       | C1.5                                           |                                                       | C1.6                                           |                                                       | C1.7                                           |                                                       | C1.8                                           |                                                       |
|---------------|------------------------------------------------|-------------------------------------------------------|------------------------------------------------|-------------------------------------------------------|------------------------------------------------|-------------------------------------------------------|------------------------------------------------|-------------------------------------------------------|------------------------------------------------|-------------------------------------------------------|------------------------------------------------|-------------------------------------------------------|------------------------------------------------|-------------------------------------------------------|------------------------------------------------|-------------------------------------------------------|
|               | Volume of HgCl <sub>2</sub><br>solution<br>[L] | THg<br>conc.<br>in eluate<br>[ $\mu\text{g L}^{-1}$ ] | Volume of HgCl <sub>2</sub><br>solution<br>[L] | THg<br>conc.<br>in eluate<br>[ $\mu\text{g L}^{-1}$ ] | Volume of HgCl <sub>2</sub><br>solution<br>[L] | THg<br>conc.<br>in eluate<br>[ $\mu\text{g L}^{-1}$ ] | Volume of HgCl <sub>2</sub><br>solution<br>[L] | THg<br>conc.<br>in eluate<br>[ $\mu\text{g L}^{-1}$ ] | Volume of HgCl <sub>2</sub><br>solution<br>[L] | THg<br>conc.<br>in eluate<br>[ $\mu\text{g L}^{-1}$ ] | Volume of HgCl <sub>2</sub><br>solution<br>[L] | THg<br>conc.<br>in eluate<br>[ $\mu\text{g L}^{-1}$ ] | Volume of HgCl <sub>2</sub><br>solution<br>[L] | THg<br>conc.<br>in eluate<br>[ $\mu\text{g L}^{-1}$ ] | Volume of HgCl <sub>2</sub><br>solution<br>[L] | THg<br>conc.<br>in eluate<br>[ $\mu\text{g L}^{-1}$ ] |
| 70            | 0.04                                           | 0.6                                                   | 0.04                                           | 0.7                                                   | 0.04                                           | 0.8                                                   | 0.04                                           | 0.8                                                   | 0.05                                           | 0.5                                                   | 0.04                                           | 0.6                                                   | 0.04                                           | 0.4                                                   | 0.04                                           | 0.5                                                   |
| 250           | 0.16                                           | 1.1                                                   | 0.16                                           | 1.0                                                   | 0.15                                           | 1.2                                                   | 0.16                                           | 1.2                                                   | 0.17                                           | 0.8                                                   | 0.16                                           | 0.9                                                   | 0.15                                           | 0.8                                                   | 0.16                                           | 1.0                                                   |
| 430           | 0.28                                           | 1.7                                                   | 0.27                                           | 20.6                                                  | 0.26                                           | 1.8                                                   | 0.27                                           | 2.4                                                   | 0.28                                           | 1.3                                                   | 0.27                                           | 1.3                                                   | 0.26                                           | 1.2                                                   | 0.27                                           | 1.7                                                   |
| 610           | 0.39                                           | 2.4                                                   | 0.38                                           | 2.2                                                   | 0.37                                           | 2.9                                                   | 0.38                                           | 3.0                                                   | 0.40                                           | 2.3                                                   | 0.38                                           | 2.2                                                   | 0.37                                           | 2.2                                                   | 0.38                                           | 2.6                                                   |
| 1330          | 0.85                                           | 7.5                                                   | 0.84                                           | 7.8                                                   | 0.80                                           | 130.3                                                 | 0.82                                           | 14.3                                                  | 0.88                                           | 8.8                                                   | 0.84                                           | 7.4                                                   | 0.81                                           | 7.0                                                   | 0.84                                           | 7.7                                                   |
| 1690          | 1.08                                           | 13.1                                                  | 1.06                                           | 83.8                                                  | 1.01                                           | 656.1                                                 | 1.05                                           | 338.0                                                 | 1.12                                           | 13.6                                                  | 1.06                                           | 11.9                                                  | 1.03                                           | 11.5                                                  | 1.06                                           | 13.1                                                  |
| 2050          | 1.31                                           | 361.7                                                 | 1.29                                           | 614.5                                                 | 1.23                                           | 2691.6                                                | 1.27                                           | 1543.6                                                | 1.35                                           | 2758.1                                                | 1.29                                           | 2319.8                                                | 1.25                                           | 2919.4                                                | 1.29                                           | 2728.5                                                |
| 2770          | 1.77                                           | 6140.8                                                | 1.75                                           | 7399.5                                                | 1.66                                           | 12235.9                                               | 1.72                                           | 13711.6                                               | 1.83                                           | 11527.8                                               | 1.75                                           | 4818.6                                                | 1.69                                           | 2491.8                                                | 1.75                                           | 7207.8                                                |
| 3130          | 2.00                                           | 12772.4                                               | 1.97                                           | 13136.0                                               | 1.88                                           | 16137.7                                               | 1.94                                           | 15866.1                                               | 2.07                                           | 18432.0                                               | 1.97                                           | 13903.5                                               | 1.91                                           | 8732.6                                                | 1.97                                           | 16788.8                                               |
| 3480          | 2.23                                           | 19182.7                                               | 2.19                                           | 20181.3                                               | 2.09                                           | 19325.1                                               | 2.16                                           | 21710.0                                               | 2.30                                           | 22379.5                                               | 2.19                                           | 21039.6                                               | 2.12                                           | 16203.3                                               | 2.19                                           | 23025.0                                               |
| 4205          | 2.69                                           | 32711.8                                               | 2.65                                           | 29593.9                                               | 2.52                                           | 26765.7                                               | 2.61                                           | 26847.1                                               | 2.78                                           | 29842.0                                               | 2.65                                           | 30958.6                                               |                                                |                                                       |                                                |                                                       |
| 4560          | 2.92                                           | 32757.7                                               | 2.87                                           | 34475.5                                               | 2.74                                           | 30631.5                                               | 2.83                                           | 29127.2                                               | 3.01                                           | 33092.1                                               | 2.87                                           | 33961.0                                               |                                                |                                                       |                                                |                                                       |
| 4945          | 3.16                                           | 38471.7                                               | 3.12                                           | 35948.8                                               | 2.97                                           | 29869.3                                               | 3.07                                           | 32329.7                                               | 3.26                                           | 36178.4                                               | 3.12                                           | 37665.9                                               |                                                |                                                       |                                                |                                                       |
| 5640          | 3.61                                           | 36366.2                                               | 3.55                                           | 37784.3                                               | 3.38                                           | 34740.4                                               | 3.50                                           | 35247.6                                               | 3.72                                           | 36106.1                                               | 3.55                                           | 36531.7                                               |                                                |                                                       |                                                |                                                       |
| 6005          | 3.84                                           | 38309.3                                               | 3.78                                           | 39147.9                                               | 3.60                                           | 34802.5                                               | 3.72                                           | 37138.0                                               | 3.96                                           | 38812.4                                               | 3.78                                           | 38645.0                                               |                                                |                                                       |                                                |                                                       |
| 6355          | 4.07                                           | 38765.9                                               | 4.00                                           | 38427.0                                               | 3.81                                           | 37034.8                                               | 3.94                                           | 41792.8                                               | 4.19                                           | 38488.9                                               | 4.00                                           | 38567.4                                               |                                                |                                                       |                                                |                                                       |
| 7075          | 4.53                                           | 42074.6                                               | 4.46                                           | 36360.8                                               | 4.25                                           | 35517.0                                               | 4.39                                           | 35337.5                                               | 4.67                                           | 37859.7                                               | 4.46                                           | 38178.0                                               |                                                |                                                       |                                                |                                                       |
| 7835          | 5.01                                           | 37373.1                                               | 4.94                                           | 38178.0                                               | 4.70                                           | 36917.7                                               | 4.86                                           | 38477.6                                               | 5.17                                           | 39359.7                                               | 4.94                                           | 39615.2                                               |                                                |                                                       |                                                |                                                       |
| 8585          | 5.49                                           | 39361.4                                               | 5.41                                           | 38339.5                                               | 5.15                                           | 37795.0                                               | 5.32                                           | 37936.9                                               | 5.67                                           | 39796.9                                               | 5.41                                           | 38836.1                                               |                                                |                                                       |                                                |                                                       |
| 9235          | 5.91                                           | 40305.7                                               | 5.82                                           | 39768.3                                               | 5.54                                           | 40675.8                                               | 5.73                                           | 40418.9                                               | 6.10                                           | 40418.9                                               | 5.82                                           | 41459.9                                               |                                                |                                                       |                                                |                                                       |
| 9965          | 6.38                                           | 40754.5                                               | 6.28                                           | 40139.1                                               | 5.98                                           | 39597.8                                               | 6.18                                           | 39984.5                                               | 6.58                                           | 39551.8                                               | 6.28                                           | 38507.0                                               |                                                |                                                       |                                                |                                                       |
|               | Volume of water<br>[L]                         | THg<br>conc.<br>in eluate<br>[ $\mu\text{g L}^{-1}$ ] | Volume of water<br>[L]                         | THg<br>conc.<br>in eluate<br>[ $\mu\text{g L}^{-1}$ ] | Volume of water<br>[L]                         | THg<br>conc.<br>in eluate<br>[ $\mu\text{g L}^{-1}$ ] |                                                |                                                       |                                                |                                                       |                                                |                                                       |                                                |                                                       |                                                |                                                       |
| 10095         | 0.08                                           | 41899.5                                               | 0.08                                           | 41027.1                                               | 0.08                                           | 41550.2                                               |                                                |                                                       |                                                |                                                       |                                                |                                                       |                                                |                                                       |                                                |                                                       |
| 10200         | 0.15                                           | 37276.7                                               | 0.15                                           | 36359.6                                               | 0.14                                           | 36386.4                                               |                                                |                                                       |                                                |                                                       |                                                |                                                       |                                                |                                                       |                                                |                                                       |
| 10325         | 0.23                                           | 37199.2                                               | 0.23                                           | 36492.0                                               | 0.22                                           | 36040.5                                               |                                                |                                                       |                                                |                                                       |                                                |                                                       |                                                |                                                       |                                                |                                                       |
| 10495         | 0.34                                           | 35843.4                                               | 0.33                                           | 36361.0                                               | 0.32                                           | 34554.7                                               |                                                |                                                       |                                                |                                                       |                                                |                                                       |                                                |                                                       |                                                |                                                       |
| 10675         | 0.45                                           | 36176.9                                               | 0.45                                           | 35620.6                                               | 0.43                                           | 31156.9                                               |                                                |                                                       |                                                |                                                       |                                                |                                                       |                                                |                                                       |                                                |                                                       |
| 11395         | 0.92                                           | 28473.2                                               | 0.90                                           | 30185.5                                               | 0.86                                           | 27354.8                                               |                                                |                                                       |                                                |                                                       |                                                |                                                       |                                                |                                                       |                                                |                                                       |
| 11770         | 1.16                                           | 20819.5                                               | 1.14                                           | 22987.1                                               | 1.08                                           | 22023.9                                               |                                                |                                                       |                                                |                                                       |                                                |                                                       |                                                |                                                       |                                                |                                                       |
| 12115         | 1.38                                           | 23198.4                                               | 1.35                                           | 18589.8                                               | 1.29                                           | 20282.4                                               |                                                |                                                       |                                                |                                                       |                                                |                                                       |                                                |                                                       |                                                |                                                       |
| 12840         | 1.84                                           | 12770.1                                               | 1.81                                           | 12888.0                                               | 1.73                                           | 14124.0                                               |                                                |                                                       |                                                |                                                       |                                                |                                                       |                                                |                                                       |                                                |                                                       |
| 13655         | 2.36                                           | 9145.9                                                | 2.32                                           | 11086.9                                               | 2.21                                           | 11530.7                                               |                                                |                                                       |                                                |                                                       |                                                |                                                       |                                                |                                                       |                                                |                                                       |
| 14375         | 2.82                                           | 7012.9                                                | 2.78                                           | 8112.7                                                | 2.65                                           | 8981.1                                                |                                                |                                                       |                                                |                                                       |                                                |                                                       |                                                |                                                       |                                                |                                                       |
| 15095         | 3.28                                           | 5974.3                                                | 3.23                                           | 7379.4                                                | 3.08                                           | 6839.8                                                |                                                |                                                       |                                                |                                                       |                                                |                                                       |                                                |                                                       |                                                |                                                       |
| 15815         | 3.74                                           | 5185.6                                                | 3.69                                           | 5162.1                                                | 3.51                                           | 6228.2                                                |                                                |                                                       |                                                |                                                       |                                                |                                                       |                                                |                                                       |                                                |                                                       |
| 16315         | 4.06                                           | 4765.2                                                | 4.00                                           | 5090.0                                                | 3.81                                           | 5445.0                                                |                                                |                                                       |                                                |                                                       |                                                |                                                       |                                                |                                                       |                                                |                                                       |
| 17455         | 4.79                                           | 3737.1                                                | 4.72                                           | 3897.4                                                | 4.49                                           | 4172.2                                                |                                                |                                                       |                                                |                                                       |                                                |                                                       |                                                |                                                       |                                                |                                                       |
| 18895         | 5.72                                           | 2827.2                                                | 5.63                                           | 2975.3                                                | 5.36                                           | 3198.3                                                |                                                |                                                       |                                                |                                                       |                                                |                                                       |                                                |                                                       |                                                |                                                       |
| 20350         | 6.65                                           | 2510.6                                                | 6.54                                           | 2566.3                                                | 6.23                                           | 2925.7                                                |                                                |                                                       |                                                |                                                       |                                                |                                                       |                                                |                                                       |                                                |                                                       |

Table S5.2: Summary of the measured THg concentrations for each column at the different times after the the start of the sorption and desorption experiments and the corresponding volume of contaminated solution flowed through ( $143.72 \pm 6.17 \text{ mg L}^{-1}$ ).

| Time<br>[min] | C2.1                                           |                                                    | C2.2                                           |                                                    | C2.3                                           |                                                    | C2.4                                           |                                                    | C2.5                                           |                                                    | C2.6                                           |                                                    | C2.7                                           |                                                    | C2.8                                           |                                                    |
|---------------|------------------------------------------------|----------------------------------------------------|------------------------------------------------|----------------------------------------------------|------------------------------------------------|----------------------------------------------------|------------------------------------------------|----------------------------------------------------|------------------------------------------------|----------------------------------------------------|------------------------------------------------|----------------------------------------------------|------------------------------------------------|----------------------------------------------------|------------------------------------------------|----------------------------------------------------|
|               | Volume of HgCl <sub>2</sub><br>solution<br>[L] | THg<br>conc.<br>in eluate<br>[µg L <sup>-1</sup> ] | Volume of HgCl <sub>2</sub><br>solution<br>[L] | THg<br>conc.<br>in eluate<br>[µg L <sup>-1</sup> ] | Volume of HgCl <sub>2</sub><br>solution<br>[L] | THg<br>conc.<br>in eluate<br>[µg L <sup>-1</sup> ] | Volume of HgCl <sub>2</sub><br>solution<br>[L] | THg<br>conc.<br>in eluate<br>[µg L <sup>-1</sup> ] | Volume of HgCl <sub>2</sub><br>solution<br>[L] | THg<br>conc.<br>in eluate<br>[µg L <sup>-1</sup> ] | Volume of HgCl <sub>2</sub><br>solution<br>[L] | THg<br>conc.<br>in eluate<br>[µg L <sup>-1</sup> ] | Volume of HgCl <sub>2</sub><br>solution<br>[L] | THg<br>conc.<br>in eluate<br>[µg L <sup>-1</sup> ] | Volume of HgCl <sub>2</sub><br>solution<br>[L] | THg<br>conc.<br>in eluate<br>[µg L <sup>-1</sup> ] |
| 60            | 0.04                                           | 2.0                                                | 0.04                                           | 2.1                                                | 0.03                                           | 3.3                                                | 0.04                                           | 4.5                                                | 0.04                                           | 2.8                                                | 0.04                                           | 2.4                                                | 0.04                                           | 1.7                                                | 0.04                                           | 2.7                                                |
| 470           | 0.28                                           | 70.2                                               | 0.29                                           | 6.2                                                | 0.27                                           | 42.4                                               | 0.28                                           | 15443.7                                            | 0.30                                           | 4643.1                                             | 0.30                                           | 919.7                                              | 0.30                                           | 10.6                                               | 0.31                                           | 242.7                                              |
| 550           | 0.33                                           | 170.3                                              | 0.34                                           | 7.1                                                | 0.32                                           | 213.0                                              | 0.33                                           | 24172.9                                            | 0.35                                           | 10842.5                                            | 0.35                                           | 3726.1                                             | 0.35                                           | 57.2                                               | 0.36                                           | 1357.3                                             |
| 640           | 0.38                                           | 339.3                                              | 0.39                                           | 12.4                                               | 0.37                                           | 617.8                                              | 0.38                                           | 31115.2                                            | 0.40                                           | 19125.5                                            | 0.40                                           | 8652.8                                             | 0.41                                           | 631.1                                              | 0.42                                           | 6554.5                                             |
| 725           | 0.44                                           | 1133.6                                             | 0.44                                           | 30.9                                               | 0.42                                           | 1592.5                                             | 0.44                                           | 38162.9                                            | 0.46                                           | 29956.4                                            | 0.46                                           | 20936.0                                            | 0.46                                           | 2842.6                                             | 0.48                                           | 21838.8                                            |
| 815           | 0.49                                           | 2655.0                                             | 0.50                                           | 129.1                                              | 0.47                                           | 2761.3                                             | 0.49                                           | 44441.0                                            | 0.51                                           | 37801.8                                            | 0.51                                           | 29899.3                                            | 0.52                                           | 9085.6                                             | 0.54                                           | 35603.5                                            |
| 905           | 0.54                                           | 6430.3                                             | 0.55                                           | 777.7                                              | 0.52                                           | 5511.7                                             | 0.54                                           | 52330.6                                            | 0.57                                           | 46709.3                                            | 0.57                                           | 38507.2                                            | 0.58                                           | 16900.1                                            | 0.60                                           | 42662.8                                            |
| 1000          | 0.60                                           | 13677.3                                            | 0.61                                           | 2873.6                                             | 0.58                                           | 10407.1                                            | 0.60                                           | 54982.1                                            | 0.63                                           | 52597.5                                            | 0.63                                           | 44364.0                                            | 0.64                                           | 33074.0                                            | 0.66                                           | 52069.8                                            |
| 1120          | 0.67                                           | 26657.0                                            | 0.68                                           | 8971.2                                             | 0.65                                           | 14412.9                                            |                                                |                                                    |                                                |                                                    | 0.71                                           | 52826.6                                            | 0.72                                           | 32494.2                                            | 0.74                                           | 57450.1                                            |
| 1180          | 0.71                                           | 31169.0                                            | 0.72                                           | 20930.1                                            | 0.68                                           | 18788.0                                            |                                                |                                                    |                                                |                                                    | 0.74                                           | 56251.2                                            | 0.76                                           | 37261.5                                            | 0.78                                           | 61330.0                                            |
| 1270          | 0.76                                           | 40302.4                                            | 0.77                                           | 41624.3                                            | 0.74                                           | 23900.1                                            |                                                |                                                    |                                                |                                                    | 0.80                                           | 62602.2                                            | 0.81                                           | 43662.5                                            | 0.84                                           | 71199.6                                            |
| 1360          | 0.82                                           | 47210.6                                            | 0.83                                           | 50096.7                                            | 0.79                                           | 27474.9                                            |                                                |                                                    |                                                |                                                    | 0.86                                           | 69545.8                                            | 0.87                                           | 51398.6                                            | 0.90                                           | 78331.1                                            |
| 1450          | 0.87                                           | 62332.2                                            | 0.88                                           | 63783.8                                            | 0.84                                           | 34612.4                                            |                                                |                                                    |                                                |                                                    | 0.91                                           | 74942.2                                            | 0.93                                           | 54550.5                                            | 0.96                                           | 78956.6                                            |
| 1540          | 0.92                                           | 61252.1                                            | 0.94                                           | 69240.5                                            | 0.89                                           | 40872.3                                            |                                                |                                                    |                                                |                                                    | 0.97                                           | 73513.8                                            | 0.99                                           | 60512.0                                            | 1.02                                           | 80523.2                                            |
| 2035          | 1.22                                           | 98846.6                                            | 1.24                                           | 103464.8                                           | 1.18                                           | 86672.3                                            |                                                |                                                    |                                                |                                                    | 1.28                                           | 93883.0                                            | 1.30                                           | 87240.7                                            | 1.34                                           | 98920.9                                            |
| 2375          | 1.43                                           | 115743.5                                           | 1.45                                           | 112668.5                                           | 1.38                                           | 108960.6                                           |                                                |                                                    |                                                |                                                    | 1.50                                           | 105180.7                                           | 1.52                                           | 113634.1                                           | 1.57                                           | 110991.7                                           |
| 2735          | 1.64                                           | 115933.8                                           | 1.67                                           | 118378.5                                           | 1.59                                           | 116450.8                                           |                                                |                                                    |                                                |                                                    | 1.72                                           | 111155.7                                           | 1.75                                           | 122557.2                                           | 1.81                                           | 113447.0                                           |
| 3455          | 2.07                                           | 120829.6                                           | 2.11                                           | 120869.2                                           | 2.00                                           | 122724.6                                           |                                                |                                                    |                                                |                                                    | 2.18                                           | 116947.6                                           | 2.21                                           | 129888.1                                           | 2.28                                           | 123361.9                                           |
| 4175          | 2.51                                           | 129316.7                                           | 2.55                                           | 130339.3                                           | 2.42                                           | 130397.9                                           |                                                |                                                    |                                                |                                                    | 2.63                                           | 125466.9                                           | 2.67                                           | 128924.3                                           | 2.76                                           | 121406.2                                           |
| 4925          | 2.96                                           | 144013.9                                           | 3.00                                           | 143324.3                                           | 2.86                                           | 147228.9                                           |                                                |                                                    |                                                |                                                    | 3.10                                           | 140397.0                                           | 3.15                                           | 146304.2                                           | 3.25                                           | 137545.3                                           |
| 5615          | 3.37                                           | 120309.2                                           | 3.43                                           | 118834.8                                           | 3.26                                           | 117071.0                                           |                                                |                                                    |                                                |                                                    | 3.54                                           | 126508.4                                           | 3.59                                           | 118991.6                                           | 3.71                                           | 123639.7                                           |
| 6805          | 4.08                                           | 143498.9                                           | 4.15                                           | 153098.7                                           | 3.95                                           | 140312.9                                           |                                                |                                                    |                                                |                                                    | 4.29                                           | 144131.0                                           | 4.36                                           | 141779.0                                           | 4.49                                           | 144131.0                                           |
| 8195          | 4.92                                           | 139125.6                                           | 5.00                                           | 139262.0                                           | 4.75                                           | 136533.9                                           |                                                |                                                    |                                                |                                                    | 5.16                                           | 138289.1                                           | 5.24                                           | 142606.0                                           | 5.41                                           | 138825.2                                           |
| 9290          | 5.57                                           | 133836.1                                           | 5.67                                           | 136073.5                                           | 5.39                                           | 133163.4                                           |                                                |                                                    |                                                |                                                    | 5.85                                           | 134939.2                                           | 5.95                                           | 131622.5                                           | 6.13                                           | 133704.9                                           |
|               | Volume of water<br>[L]                         | THg<br>conc.<br>in eluate<br>[µg L <sup>-1</sup> ] | Volume of water<br>[L]                         | THg<br>conc.<br>in eluate<br>[µg L <sup>-1</sup> ] | Volume of water<br>[L]                         | THg<br>conc.<br>in eluate<br>[µg L <sup>-1</sup> ] |                                                |                                                    |                                                |                                                    |                                                |                                                    |                                                |                                                    |                                                |                                                    |
| 9425          | 0.08                                           | 139816.9                                           | 0.08                                           | 139631.0                                           | 0.08                                           | 138821.8                                           |                                                |                                                    |                                                |                                                    |                                                |                                                    |                                                |                                                    |                                                |                                                    |
| 9700          | 0.25                                           | 79744.4                                            | 0.25                                           | 81592.6                                            | 0.24                                           | 78608.4                                            |                                                |                                                    |                                                |                                                    |                                                |                                                    |                                                |                                                    |                                                |                                                    |
| 9935          | 0.39                                           | 62344.6                                            | 0.39                                           | 67895.9                                            | 0.37                                           | 71020.8                                            |                                                |                                                    |                                                |                                                    |                                                |                                                    |                                                |                                                    |                                                |                                                    |
| 10655         | 0.82                                           | 38428.8                                            | 0.83                                           | 37432.7                                            | 0.79                                           | 40584.6                                            |                                                |                                                    |                                                |                                                    |                                                |                                                    |                                                |                                                    |                                                |                                                    |
| 11020         | 1.04                                           | 31474.2                                            | 1.06                                           | 29302.4                                            | 1.00                                           | 31854.3                                            |                                                |                                                    |                                                |                                                    |                                                |                                                    |                                                |                                                    |                                                |                                                    |
| 11375         | 1.25                                           | 26123.7                                            | 1.27                                           | 24603.6                                            | 1.21                                           | 26701.7                                            |                                                |                                                    |                                                |                                                    |                                                |                                                    |                                                |                                                    |                                                |                                                    |
| 12155         | 1.72                                           | 17810.8                                            | 1.75                                           | 16304.9                                            | 1.66                                           | 18192.9                                            |                                                |                                                    |                                                |                                                    |                                                |                                                    |                                                |                                                    |                                                |                                                    |
| 12815         | 2.12                                           | 17810.8                                            | 2.15                                           | 12510.0                                            | 2.04                                           | 14822.8                                            |                                                |                                                    |                                                |                                                    |                                                |                                                    |                                                |                                                    |                                                |                                                    |
| 13625         | 2.60                                           | 11834.3                                            | 2.64                                           | 11239.5                                            | 2.51                                           | 12904.7                                            |                                                |                                                    |                                                |                                                    |                                                |                                                    |                                                |                                                    |                                                |                                                    |
| 14255         | 2.98                                           | 9361.4                                             | 3.03                                           | 9311.3                                             | 2.88                                           | 10799.4                                            |                                                |                                                    |                                                |                                                    |                                                |                                                    |                                                |                                                    |                                                |                                                    |
| 15170         | 3.53                                           | 7107.3                                             | 3.59                                           | 6779.3                                             | 3.41                                           | 7641.9                                             |                                                |                                                    |                                                |                                                    |                                                |                                                    |                                                |                                                    |                                                |                                                    |

## S6. Model fitting for liquid-phase sorption and desorption curves.

Table S6.1: Model fitting for liquid-phase sorption and desorption experiments for EXP1

| <b>EXP1 Sorption</b> |                                    |
|----------------------|------------------------------------|
| Model                | Freundlich                         |
| Equation             | $y = a \cdot x^b (b \cdot x^{-c})$ |
| Plot                 | C mean                             |
| a                    | 1366.35747 ± 456.84715             |
| b                    | 5.29409 ± 0.60819                  |
| c                    | 0.57616 ± 0.03746                  |
| Reduced Chi-Sqr      | 12.26486                           |
| R-Square (COD)       | 0.99442                            |
| Adj. R-Square        | 0.9938                             |

  

| <b>EXP1 Desorption</b> |                                 |
|------------------------|---------------------------------|
| Model                  | Exponential decay               |
| Equation               | $y = A1 \cdot \exp(-x/t1) + y0$ |
| Plot                   | C mean                          |
| y0                     | 2053.32898 ± 367.5216           |
| A1                     | 2.59719e6 ± 676227.00532        |
| t1                     | 1.50833 ± 0.0942                |
| Reduced Chi-Sqr        | 3.71419                         |
| R-Square (COD)         | 0.99894                         |
| Adj. R-Square          | 0.99879                         |

Table S6.2: Model fitting for liquid-phase sorption and desorption experiments for EXP2

| <b>EXP2 Sorption</b> |                                    |
|----------------------|------------------------------------|
| Model                | FreundlichEXT                      |
| Equation             | $y = a \cdot x^b (b \cdot x^{-c})$ |
| Plot                 | C mean                             |
| a                    | 67537.02358 ± 4269.52802           |
| b                    | 1.47832 ± 0.1398                   |
| c                    | 0.75874 ± 0.03538                  |
| Reduced Chi-Sqr      | 2.07179                            |
| R-Square (COD)       | 0.99878                            |
| Adj. R-Square        | 0.99867                            |

  

| <b>EXP2 Desorption</b> |                                                                  |
|------------------------|------------------------------------------------------------------|
| Model                  | Exponential Decay                                                |
| Equation               | $y = y0 + A1 \cdot \exp(-(x-x0)/t1) + A2 \cdot \exp(-(x-x0)/t2)$ |
| Plot                   | C mean                                                           |
| y0                     | 5561.52218 ± 1303.39439                                          |
| x0                     | 5.79595 ± 14079.54274                                            |
| A1                     | 93048.54603 ± 1.08768e10                                         |
| t1                     | 0.12045 ± 0.03325                                                |
| A2                     | 72737.1491 ± 1.06232e9                                           |
| t2                     | 0.96403 ± 0.18122                                                |
| Reduced Chi-Sqr        | 1.87912                                                          |
| R-Square (COD)         | 0.99993                                                          |
| Adj. R-Square          | 0.99986                                                          |



## S7. Liquid-phase stable isotope data.

Table S7.1: Liquid-phase Hg stable isotope data.

| Column         | Sample time [Minutes] | Sample time [Hours] | MCICPMS Session Date | Conc. Level for MCICPMS run | $\delta^{202/198}\text{Hg}$ |         | $\Delta^{199}\text{Hg}$ |         | $\Delta^{200}\text{Hg}$ |         | $\Delta^{201}\text{Hg}$ |         | $\Delta^{204}\text{Hg}$ |         |
|----------------|-----------------------|---------------------|----------------------|-----------------------------|-----------------------------|---------|-------------------------|---------|-------------------------|---------|-------------------------|---------|-------------------------|---------|
|                |                       |                     |                      |                             | [‰]                         | 2SD [‰] | [‰]                     | 2SD [‰] | [‰]                     | 2SD [‰] | [‰]                     | 2SD [‰] | [‰]                     | 2SD [‰] |
| C2.1           | 1180                  | 19.7                | 03/05/2022           | 10 ppb                      | -0.39                       | 0.05    | 0.06                    | 0.05    | 0.02                    | 0.03    | 0.03                    | 0.03    | -0.04                   | 0.04    |
| C2.1           | 1270                  | 21.17               | 03/05/2022           | 10 ppb                      | -0.46                       | 0.05    | 0.06                    | 0.05    | 0.01                    | 0.03    | 0.01                    | 0.03    | -0.03                   | 0.04    |
| C2.1           | 1450                  | 24.17               | 04/05/2022           | 5 ppb                       | -0.53                       | 0.08    | 0.06                    | 0.07    | 0.03                    | 0.03    | 0.05                    | 0.02    | -0.02                   | 0.02    |
| C2.1           | 1540                  | 25.7                | 04/05/2022           | 5 ppb                       | -0.51                       | 0.08    | 0.06                    | 0.07    | -0.02                   | 0.03    | 0.02                    | 0.02    | -0.04                   | 0.02    |
| C2.1           | 4005                  | 66.75               | 04/05/2022           | 5 ppb                       | -0.55                       | 0.08    | 0.04                    | 0.07    | -0.01                   | 0.03    | -0.03                   | 0.02    | -0.06                   | 0.02    |
| C2.1           | 4005                  | 66.75               | 04/05/2022           | 5 ppb                       | -0.60                       | 0.08    | 0.01                    | 0.07    | -0.02                   | 0.03    | 0.00                    | 0.02    | -0.04                   | 0.02    |
| C2.1           | 9290                  | 154.8               | 03/05/2022           | 10 ppb                      | -0.53                       | 0.05    | 0.05                    | 0.05    | 0.03                    | 0.03    | 0.01                    | 0.03    | -0.03                   | 0.04    |
| C2.1           | 9700                  | 161.7               | 03/05/2022           | 10 ppb                      | -0.57                       | 0.05    | 0.04                    | 0.05    | 0.01                    | 0.03    | 0.00                    | 0.03    | 0.00                    | 0.04    |
| C2.1           | 11020                 | 183.7               | 03/05/2022           | 10 ppb                      | -0.54                       | 0.05    | 0.04                    | 0.05    | 0.03                    | 0.03    | -0.01                   | 0.03    | 0.01                    | 0.04    |
| C2.1           | 15190                 | 253.2               | 03/05/2022           | 10 ppb                      | -0.55                       | 0.05    | 0.01                    | 0.05    | -0.01                   | 0.03    | -0.01                   | 0.03    | 0.02                    | 0.04    |
| C2.2           | 1180                  | 19.7                | 03/05/2022           | 10 ppb                      | -0.11                       | 0.05    | 0.07                    | 0.05    | 0.01                    | 0.03    | 0.01                    | 0.03    | -0.03                   | 0.04    |
| C2.2           | 1270                  | 21.2                | 04/05/2022           | 5 ppb                       | -0.16                       | 0.08    | 0.10                    | 0.07    | 0.06                    | 0.03    | 0.03                    | 0.02    | 0.01                    | 0.02    |
| C2.2           | 1450                  | 24.2                | 03/05/2022           | 10 ppb                      | -0.45                       | 0.05    | 0.05                    | 0.05    | 0.01                    | 0.03    | 0.01                    | 0.03    | -0.06                   | 0.04    |
| C2.2           | 1540                  | 25.7                | 03/05/2022           | 10 ppb                      | -0.47                       | 0.05    | 0.04                    | 0.05    | 0.00                    | 0.03    | 0.00                    | 0.03    | -0.04                   | 0.04    |
| C2.2           | 4005                  | 66.8                | 04/05/2022           | 5 ppb                       | -0.56                       | 0.08    | 0.04                    | 0.07    | 0.03                    | 0.03    | 0.02                    | 0.02    | 0.01                    | 0.02    |
| C2.2           | 9290                  | 154.8               | 03/05/2022           | 10 ppb                      | -0.60                       | 0.05    | 0.04                    | 0.05    | -0.01                   | 0.03    | -0.01                   | 0.03    | -0.03                   | 0.04    |
| C2.2           | 9700                  | 161.7               | 03/05/2022           | 10 ppb                      | -0.56                       | 0.05    | 0.05                    | 0.05    | 0.00                    | 0.03    | 0.01                    | 0.03    | 0.00                    | 0.04    |
| C2.2           | 11020                 | 183.7               | 03/05/2022           | 10 ppb                      | -0.61                       | 0.05    | 0.03                    | 0.05    | 0.01                    | 0.03    | 0.00                    | 0.03    | 0.04                    | 0.04    |
| C2.2           | 15190                 | 253.2               | 03/05/2022           | 10 ppb                      | -0.51                       | 0.05    | 0.02                    | 0.05    | 0.02                    | 0.03    | -0.02                   | 0.03    | 0.01                    | 0.04    |
| C2.3           | 1180                  | 19.7                | 03/05/2022           | 10 ppb                      | -0.40                       | 0.05    | 0.01                    | 0.05    | -0.02                   | 0.03    | 0.02                    | 0.03    | -0.01                   | 0.04    |
| C2.3           | 1270                  | 21.2                | 03/05/2022           | 10 ppb                      | -0.33                       | 0.05    | 0.06                    | 0.05    | 0.01                    | 0.03    | 0.01                    | 0.03    | -0.04                   | 0.04    |
| C2.3           | 1450                  | 24.2                | 04/05/2022           | 5 ppb                       | -0.51                       | 0.08    | 0.05                    | 0.07    | 0.01                    | 0.03    | 0.06                    | 0.02    | -0.05                   | 0.02    |
| C2.3           | 1540                  | 25.7                | 04/05/2022           | 5 ppb                       | -0.52                       | 0.08    | 0.05                    | 0.07    | -0.01                   | 0.03    | 0.01                    | 0.02    | -0.03                   | 0.02    |
| C2.3           | 4005                  | 66.8                | 04/05/2022           | 5 ppb                       | -0.55                       | 0.08    | 0.02                    | 0.07    | 0.00                    | 0.03    | -0.01                   | 0.02    | -0.01                   | 0.02    |
| C2.3           | 9290                  | 154.8               | 04/05/2022           | 10 ppb                      | -0.60                       | 0.03    | 0.03                    | 0.02    | 0.03                    | 0.03    | 0.01                    | 0.02    | 0.01                    | 0.03    |
| C2.3           | 9700                  | 161.7               | 04/05/2022           | 10 ppb                      | -0.57                       | 0.03    | 0.04                    | 0.02    | 0.01                    | 0.03    | 0.01                    | 0.02    | 0.01                    | 0.03    |
| C2.3           | 11020                 | 183.7               | 04/05/2022           | 10 ppb                      | -0.57                       | 0.03    | 0.04                    | 0.02    | 0.02                    | 0.03    | 0.01                    | 0.02    | 0.03                    | 0.03    |
| C2.3           | 15470                 | 257.8               | 04/05/2022           | 5 ppb                       | -0.51                       | 0.08    | 0.02                    | 0.07    | 0.01                    | 0.03    | 0.00                    | 0.02    | 0.03                    | 0.02    |
| Stock Solution |                       |                     | 03/05/2022           | 10 ppb                      | -0.60                       | 0.05    | 0.01                    | 0.05    | 0.00                    | 0.03    | 0.01                    | 0.03    | 0.00                    | 0.04    |
| Stock Solution |                       |                     | 04/05/2022           | 10 ppb                      | -0.62                       | 0.03    | 0.03                    | 0.02    | 0.01                    | 0.03    | 0.00                    | 0.02    | -0.02                   | 0.03    |
| Stock Solution |                       |                     | 04/05/2022           | 5 ppb                       | -0.62                       | 0.08    | 0.02                    | 0.07    | 0.01                    | 0.03    | -0.01                   | 0.02    | -0.01                   | 0.02    |

## S8. Hg stable isotope, THg concentration & moisture content data for solid-phase materials including column sections.

Table S8.1: Solid-phase THg concentrations and Hg stable isotope data.

| Column | Section | Sorption period | THg Conc. [mg kg <sup>-1</sup> ] | MCICPMS Session Date | Concentration Level for MCICPMS run | $\delta^{202/198}\text{Hg}$ |         | $\Delta^{199}\text{Hg}$ |         | $\Delta^{200}\text{Hg}$ |         | $\Delta^{201}\text{Hg}$ |         | $\Delta^{204}\text{Hg}$ |         |
|--------|---------|-----------------|----------------------------------|----------------------|-------------------------------------|-----------------------------|---------|-------------------------|---------|-------------------------|---------|-------------------------|---------|-------------------------|---------|
|        |         |                 |                                  |                      |                                     | [‰]                         | 2SD [‰] | [‰]                     | 2SD [‰] | [‰]                     | 2SD [‰] | [‰]                     | 2SD [‰] | [‰]                     | 2SD [‰] |
| C1.7   | T       | 50% brkth.      | 1076                             | 15/12/2021           | 5 ppb                               | -0.57                       | 0.15    | 0.04                    | 0.01    | 0.00                    | 0.02    | 0.03                    | 0.05    | 0.01                    | 0.07    |
| C1.7   | M       | 50% brkth.      | 1843                             | 15/12/2021           | 10 ppb                              | -0.71                       | 0.07    | 0.03                    | 0.02    | 0.03                    | 0.02    | 0.00                    | 0.02    | -0.05                   | 0.08    |
| C1.7   | B       | 50% brkth.      | 1490                             | 15/12/2021           | 10 ppb                              | -0.76                       | 0.07    | 0.02                    | 0.02    | 0.00                    | 0.02    | 0.00                    | 0.02    | 0.00                    | 0.08    |
| C1.8   | T       | 50% brkth.      | 356                              | 15/12/2021           | 10 ppb                              | -0.59                       | 0.07    | 0.05                    | 0.02    | 0.02                    | 0.02    | 0.00                    | 0.02    | -0.03                   | 0.08    |
| C1.8   | M       | 50% brkth.      | 1280                             | 15/12/2021           | 10 ppb                              | -0.66                       | 0.07    | 0.02                    | 0.02    | 0.00                    | 0.02    | 0.01                    | 0.02    | 0.01                    | 0.08    |
| C1.8   | B       | 50% brkth.      | 1245                             | 15/12/2021           | 10 ppb                              | -0.75                       | 0.07    | 0.02                    | 0.02    | -0.01                   | 0.02    | 0.00                    | 0.02    | -0.04                   | 0.08    |
| C1.4   | T       | Equilib.        | 1432                             | 14/12/2021           | 10 ppb                              | -0.73                       | 0.03    | 0.01                    | 0.01    | -0.01                   | 0.02    | -0.03                   | 0.01    | -0.04                   | 0.03    |
| C1.4   | M       | Equilib.        | 1183                             | 14/12/2021           | 10 ppb                              | -0.77                       | 0.03    | 0.03                    | 0.01    | 0.03                    | 0.02    | 0.03                    | 0.01    | -0.01                   | 0.03    |
| C1.4   | B       | Equilib.        | 1698                             | 14/12/2021           | 10 ppb                              | -0.88                       | 0.03    | 0.16                    | 0.01    | 0.11                    | 0.02    | 0.08                    | 0.01    | -0.05                   | 0.03    |
| C1.4   | B       | Equilib.        | 1575                             | 14/12/2021           | 10 ppb                              | -0.77                       | 0.03    | -0.01                   | 0.01    | -0.02                   | 0.02    | -0.05                   | 0.01    | 0.11                    | 0.03    |
| C1.4   | B       | Equilib.        | 369                              | 15/12/2021           | 10 ppb                              | -0.84                       | 0.07    | 0.00                    | 0.02    | 0.00                    | 0.02    | 0.00                    | 0.02    | 0.02                    | 0.08    |
| C1.5   | T       | Equilib.        | 1261                             | 15/12/2021           | 5 ppb                               | -0.69                       | 0.15    | 0.03                    | 0.01    | -0.02                   | 0.02    | -0.01                   | 0.05    | -0.01                   | 0.07    |
| C1.5   | M       | Equilib.        | 2031                             | 15/12/2021           | 10 ppb                              | -0.76                       | 0.07    | 0.05                    | 0.02    | 0.03                    | 0.02    | 0.04                    | 0.02    | -0.03                   | 0.08    |
| C1.5   | B       | Equilib.        | 1594                             | 15/12/2021           | 10 ppb                              | -0.62                       | 0.07    | 0.13                    | 0.02    | 0.06                    | 0.02    | 0.04                    | 0.02    | -0.96                   | 0.08    |
| C1.6   | T       | Equilib.        | 1364                             | 15/12/2021           | 10 ppb                              | -0.73                       | 0.07    | 0.03                    | 0.02    | 0.01                    | 0.02    | 0.01                    | 0.02    | -0.01                   | 0.08    |
| C1.6   | M       | Equilib.        | 1541                             | 15/12/2021           | 10 ppb                              | -0.77                       | 0.07    | 0.04                    | 0.02    | 0.02                    | 0.02    | 0.01                    | 0.02    | -0.03                   | 0.08    |
| C1.6   | B       | Equilib.        | 1410                             | 15/12/2021           | 10 ppb                              | -0.76                       | 0.07    | 0.02                    | 0.02    | 0.00                    | 0.02    | 0.00                    | 0.02    | -0.04                   | 0.08    |
| C1.1   | T       | Desorp.         | 816                              | 14/12/2021           | 10 ppb                              | -0.88                       | 0.03    | 0.03                    | 0.01    | 0.01                    | 0.02    | 0.00                    | 0.01    | -0.01                   | 0.03    |
| C1.1   | M       | Desorp.         | 716                              | 14/12/2021           | 10 ppb                              | -1.00                       | 0.03    | 0.02                    | 0.01    | 0.00                    | 0.02    | -0.02                   | 0.01    | 0.00                    | 0.03    |
| C1.1   | B       | Desorp.         | 634                              | 14/12/2021           | 10 ppb                              | -1.02                       | 0.03    | 0.05                    | 0.01    | 0.00                    | 0.02    | 0.01                    | 0.01    | -0.02                   | 0.03    |
| C1.2   | T       | Desorp.         | 948                              | 14/12/2021           | 10 ppb                              | -0.91                       | 0.03    | 0.01                    | 0.01    | 0.01                    | 0.02    | 0.01                    | 0.01    | 0.00                    | 0.03    |
| C1.2   | M       | Desorp.         | 771                              | 14/12/2021           | 10 ppb                              | -0.94                       | 0.03    | 0.00                    | 0.01    | 0.00                    | 0.02    | 0.00                    | 0.01    | -0.01                   | 0.03    |
| C1.2   | M       | Desorp.         | 634                              | 14/12/2021           | 10 ppb                              | -1.00                       | 0.03    | 0.02                    | 0.01    | 0.02                    | 0.02    | 0.00                    | 0.01    | 0.01                    | 0.03    |
| C1.2   | M       | Desorp.         | 850                              | 14/12/2021           | 10 ppb                              | -0.92                       | 0.03    | 0.01                    | 0.01    | 0.03                    | 0.02    | -0.01                   | 0.01    | 0.03                    | 0.03    |
| C1.2   | B       | Desorp.         | 1182                             | 14/12/2021           | 10 ppb                              | -1.01                       | 0.03    | 0.04                    | 0.01    | -0.02                   | 0.02    | 0.01                    | 0.01    | -0.02                   | 0.03    |
| C1.3   | T       | Desorp.         | 804                              | 14/12/2021           | 10 ppb                              | -0.88                       | 0.03    | 0.01                    | 0.01    | -0.01                   | 0.02    | 0.01                    | 0.01    | -0.04                   | 0.03    |
| C1.3   | M       | Desorp.         | 733                              | 14/12/2021           | 10 ppb                              | -0.93                       | 0.03    | 0.03                    | 0.01    | 0.01                    | 0.02    | 0.00                    | 0.01    | 0.00                    | 0.03    |
| C1.3   | B       | Desorp.         | 968                              | 14/12/2021           | 10 ppb                              | -0.92                       | 0.03    | -0.12                   | 0.01    | -0.12                   | 0.02    | -0.06                   | 0.01    | 0.03                    | 0.03    |
| C2.4   | T       | 50% brkth.      | 819                              | 16/12/2021           | 5 ppb                               | -0.64                       | 0.01    | 0.03                    | 0.02    | 0.04                    | 0.03    | 0.01                    | 0.01    | 0.03                    | 0.06    |
| C2.4   | M       | 50% brkth.      | 550                              | 16/12/2021           | 5 ppb                               | -0.62                       | 0.01    | 0.00                    | 0.02    | 0.00                    | 0.03    | -0.01                   | 0.01    | 0.03                    | 0.06    |
| C2.5   | T       | 50% brkth.      | 987                              | 17/12/2021           | 5 ppb                               | -0.62                       | 0.01    | 0.02                    | 0.02    | -0.01                   | 0.03    | -0.02                   | 0.01    | 0.00                    | 0.06    |
| C2.5   | M       | 50% brkth.      | 953                              | 17/12/2021           | 5 ppb                               | -0.72                       | 0.15    | 0.02                    | 0.01    | 0.04                    | 0.02    | 0.01                    | 0.05    | 0.00                    | 0.07    |
| C2.5   | M       | 50% brkth.      | 495                              | 17/12/2021           | 5 ppb                               | -0.69                       | 0.15    | 0.02                    | 0.01    | 0.03                    | 0.02    | 0.01                    | 0.05    | 0.05                    | 0.07    |
| C2.5   | M       | 50% brkth.      | 479                              | 17/12/2021           | 5 ppb                               | -0.58                       | 0.01    | 0.04                    | 0.02    | 0.00                    | 0.03    | 0.00                    | 0.01    | -0.03                   | 0.06    |
| C2.5   | B       | 50% brkth.      | 427                              | 17/12/2021           | 10 ppb                              | -0.58                       | 0.01    | 0.04                    | 0.02    | 0.00                    | 0.03    | 0.00                    | 0.01    | -0.02                   | 0.06    |
| C2.6   | T       | Equilib.        | 1157                             | 17/12/2021           | 10 ppb                              | -0.70                       | 0.03    | 0.15                    | 0.02    | 0.03                    | 0.01    | 0.00                    | 0.00    | -0.06                   | 0.01    |
| C2.6   | M       | Equilib.        | 2766                             | 17/12/2021           | 10 ppb                              | -0.77                       | 0.03    | 0.24                    | 0.02    | 0.06                    | 0.01    | 0.03                    | 0.00    | -0.01                   | 0.01    |
| C2.6   | B       | Equilib.        | 1885                             | 17/12/2021           | 10 ppb                              | -0.70                       | 0.03    | 0.11                    | 0.02    | 0.02                    | 0.01    | 0.02                    | 0.00    | 0.00                    | 0.01    |
| C2.7   | T       | Equilib.        | 2500                             | 17/12/2021           | 10 ppb                              | -0.68                       | 0.03    | 0.03                    | 0.02    | 0.00                    | 0.01    | 0.00                    | 0.00    | -0.02                   | 0.01    |
| C2.7   | M       | Equilib.        | 1946                             | 17/12/2021           | 10 ppb                              | -0.96                       | 0.03    | 0.03                    | 0.02    | 0.02                    | 0.01    | 0.00                    | 0.00    | 0.04                    | 0.01    |
| C2.7   | B       | Equilib.        | 2284                             | 17/12/2021           | 10 ppb                              | -0.70                       | 0.03    | 0.05                    | 0.02    | 0.02                    | 0.01    | 0.03                    | 0.00    | -0.01                   | 0.01    |
| C2.8   | T       | Equilib.        | 2720                             | 17/12/2021           | 10 ppb                              | -0.75                       | 0.03    | 0.05                    | 0.02    | 0.02                    | 0.01    | 0.01                    | 0.00    | -0.01                   | 0.01    |
| C2.8   | T       | Equilib.        | 1823                             | 17/12/2021           | 10 ppb                              | -1.53                       | 0.03    | 0.03                    | 0.02    | 0.00                    | 0.01    | -0.03                   | 0.00    | 0.01                    | 0.01    |
| C2.8   | T       | Equilib.        | 2175                             | 17/12/2021           | 5 ppb                               | -1.52                       | 0.03    | 0.04                    | 0.02    | 0.01                    | 0.01    | 0.01                    | 0.00    | 0.01                    | 0.01    |
| C2.8   | T       | Equilib.        | 2414                             | 17/12/2021           | 10 ppb                              | -0.65                       | 0.03    | 0.02                    | 0.02    | 0.02                    | 0.01    | 0.05                    | 0.00    | -0.04                   | 0.01    |
| C2.8   | M       | Equilib.        | 2333                             | 17/12/2021           | 10 ppb                              | -0.71                       | 0.03    | 0.02                    | 0.02    | 0.01                    | 0.01    | 0.00                    | 0.00    | 0.00                    | 0.01    |
| C2.8   | B       | Equilib.        | 2524                             | 17/12/2021           | 10 ppb                              | -0.76                       | 0.03    | 0.04                    | 0.02    | 0.00                    | 0.01    | 0.02                    | 0.00    | 0.01                    | 0.01    |
| C2.1   | T       | Desorp.         | 1324                             | 15/12/2021           | 10 ppb                              | -0.85                       | 0.07    | 0.05                    | 0.02    | 0.01                    | 0.02    | 0.04                    | 0.02    | -0.01                   | 0.08    |
| C2.1   | M       | Desorp.         | 975                              | 15/12/2021           | 5 ppb                               | -0.81                       | 0.15    | 0.03                    | 0.01    | 0.01                    | 0.02    | 0.03                    | 0.05    | -0.02                   | 0.07    |
| C2.1   | B       | Desorp.         | 889                              | 15/12/2021           | 10 ppb                              | -0.96                       | 0.07    | 0.06                    | 0.02    | -0.01                   | 0.02    | 0.01                    | 0.02    | 0.02                    | 0.08    |
| C2.2   | T       | Desorp.         | 384                              | 15/12/2021           | 10 ppb                              | -0.86                       | 0.07    | 0.03                    | 0.02    | 0.02                    | 0.02    | 0.00                    | 0.02    | 0.00                    | 0.08    |
| C2.2   | M       | Desorp.         | 1165                             | 15/12/2021           | 10 ppb                              | -0.85                       | 0.07    | 0.04                    | 0.02    | 0.01                    | 0.02    | 0.00                    | 0.02    | 0.00                    | 0.08    |
| C2.2   | B       | Desorp.         | 808                              | 15/12/2021           | 10 ppb                              | -0.93                       | 0.07    | 0.03                    | 0.02    | 0.00                    | 0.02    | 0.00                    | 0.02    | -0.02                   | 0.08    |
| C2.3   | T       | Desorp.         | 1108                             | 15/12/2021           | 10 ppb                              | -1.68                       | 0.07    | 0.06                    | 0.02    | 0.03                    | 0.02    | 0.03                    | 0.02    | 0.01                    | 0.08    |
| C2.3   | T       | Desorp.         | 1108                             | 16/12/2021           | 5 ppb                               | -1.66                       | 0.07    | 0.05                    | 0.02    | 0.00                    | 0.02    | -0.01                   | 0.02    | 0.02                    | 0.08    |
| C2.3   | M       | Desorp.         | 1030                             | 16/12/2021           | 10 ppb                              | -0.79                       | 0.07    | 0.04                    | 0.02    | 0.01                    | 0.02    | 0.00                    | 0.02    | -0.05                   | 0.08    |
| C2.3   | B       | Desorp.         | 996                              | 16/12/2021           | 5 ppb                               | -0.88                       | 0.01    | 0.04                    | 0.02    | 0.00                    | 0.03    | 0.00                    | 0.01    | 0.00                    | 0.06    |

Table S8.2: Moisture content of solid-phase samples.

| sample | empty bowl [g] | bowl + wet [g] | bowl + dry [g] | wet [g] | dry [g] | Moisture content fraction [-] |
|--------|----------------|----------------|----------------|---------|---------|-------------------------------|
| C1.1 T | 14.2399        | 16.1681        | 15.7769        | 1.9282  | 1.5370  | 0.25                          |
| C1.1 M | 14.5923        | 16.8133        | 16.3516        | 2.2210  | 1.7593  | 0.26                          |
| C1.1 B | 14.4404        | 16.2255        | 15.8688        | 1.7851  | 1.4284  | 0.25                          |
| C1.2 T | 15.1776        | 17.2084        | 16.8279        | 2.0308  | 1.6503  | 0.23                          |
| C1.2 M | 14.2865        | 16.5868        | 16.1434        | 2.3003  | 1.8569  | 0.24                          |
| C1.2 B | 14.6072        | 16.7256        | 16.3260        | 2.1184  | 1.7188  | 0.23                          |
| C1.3 T | 14.4939        | 16.7740        | 16.3102        | 2.2801  | 1.8163  | 0.26                          |
| C1.3 M | 14.5032        | 16.6202        | 16.2059        | 2.1170  | 1.7027  | 0.24                          |
| C1.3 B | 14.2353        | 16.9487        | 16.4914        | 2.7134  | 2.2561  | 0.20                          |
| C1.4 T | 14.2520        | 16.6402        | 16.2112        | 2.3882  | 1.9592  | 0.22                          |
| C1.4 M | 14.2428        | 16.4535        | 16.1166        | 2.2107  | 1.8738  | 0.18                          |
| C1.4 B | 14.5614        | 16.7126        | 16.2810        | 2.1512  | 1.7196  | 0.25                          |
| C1.5 T | 14.3377        | 16.6358        | 16.1890        | 2.2981  | 1.8513  | 0.24                          |
| C1.5 M | 14.3580        | 16.5369        | 16.1098        | 2.1789  | 1.7518  | 0.24                          |
| C1.5 B | 14.2582        | 16.9172        | 16.3734        | 2.6590  | 2.1152  | 0.26                          |
| C1.6 T | 14.3407        | 16.4050        | 16.0082        | 2.0643  | 1.6675  | 0.24                          |
| C1.6 M | 15.1316        | 17.5291        | 17.0667        | 2.3975  | 1.9351  | 0.24                          |
| C1.6 B | 13.6881        | 16.2738        | 15.7482        | 2.5857  | 2.0601  | 0.26                          |
| C1.7 T | 14.6466        | 16.9012        | 16.4728        | 2.2546  | 1.8262  | 0.23                          |
| C1.7 M | 14.2800        | 16.7787        | 16.2839        | 2.4987  | 2.0039  | 0.25                          |
| C1.7 B | 14.5585        | 17.1876        | 16.6729        | 2.6291  | 2.1144  | 0.24                          |
| C1.8 T | 14.5288        | 16.5272        | 16.1569        | 1.9984  | 1.6281  | 0.23                          |
| C1.8 M | 14.6245        | 17.0316        | 16.5597        | 2.4071  | 1.9352  | 0.24                          |
| C1.8 B | 14.2253        | 16.9229        | 16.4047        | 2.6976  | 2.1794  | 0.24                          |
| C2.1 T | 14.4793        | 16.4503        | 16.1304        | 1.9710  | 1.6511  | 0.19                          |
| C2.1 M | 14.4759        | 16.3635        | 16.0722        | 1.8876  | 1.5963  | 0.18                          |
| C2.1 B | 14.4480        | 17.3383        | 16.7690        | 2.8903  | 2.3210  | 0.25                          |
| C2.2 T | 14.5447        | 16.7918        | 16.3792        | 2.2471  | 1.8345  | 0.22                          |
| C2.2 M | 14.2621        | 16.5318        | 16.1551        | 2.2697  | 1.8930  | 0.20                          |
| C2.2 B | 14.2837        | 16.3190        | 15.9553        | 2.0353  | 1.6716  | 0.22                          |
| C2.3 T | 28.0688        | 30.2345        | 29.8495        | 2.1657  | 1.7807  | 0.22                          |
| C2.3 M | 21.9693        | 24.2332        | 23.7923        | 2.2639  | 1.8230  | 0.24                          |
| C2.3 B | 14.5411        | 16.7309        | 16.2667        | 2.1898  | 1.7256  | 0.27                          |
| C2.4 T | 14.4307        | 16.4265        | 16.0489        | 1.9958  | 1.6182  | 0.23                          |
| C2.4 M | 14.4250        | 16.4872        | 16.0988        | 2.0622  | 1.6738  | 0.23                          |
| C2.4 B | 14.2458        | 16.7146        | 16.2126        | 2.4688  | 1.9668  | 0.26                          |
| C2.5 T | 21.9291        | 24.2804        | 23.8550        | 2.3513  | 1.9259  | 0.22                          |
| C2.5 M | 14.4951        | 16.2468        | 15.9168        | 1.7517  | 1.4217  | 0.23                          |
| C2.5 B | 14.2588        | 16.9137        | 16.4452        | 2.6549  | 2.1864  | 0.21                          |
| C2.6 T | 28.1416        | 30.3790        | 30.0203        | 2.2374  | 1.8787  | 0.19                          |
| C2.6 M | 23.3120        | 25.5319        | 25.1501        | 2.2199  | 1.8381  | 0.21                          |
| C2.6 B | 28.6517        | 31.0150        | 30.5710        | 2.3633  | 1.9193  | 0.23                          |
| C2.7 T | 14.1971        | 16.3535        | 16.0053        | 2.1564  | 1.8082  | 0.19                          |
| C2.7 M | 14.2804        | 16.5800        | 16.1495        | 2.2996  | 1.8691  | 0.23                          |
| C2.7 B | 14.2438        | 16.5827        | 16.1254        | 2.3389  | 1.8816  | 0.24                          |
| C2.8 T | 14.3536        | 16.3386        | 15.9580        | 1.9850  | 1.6044  | 0.24                          |
| C2.8 M | 14.2856        | 16.4172        | 15.9998        | 2.1316  | 1.7142  | 0.24                          |
| C2.8 B | 14.1807        | 17.0191        | 16.4126        | 2.8384  | 2.2319  | 0.27                          |

## S9. Pyrolytic Thermal Desorption (PTD) curves for solid-phase speciation analyses.

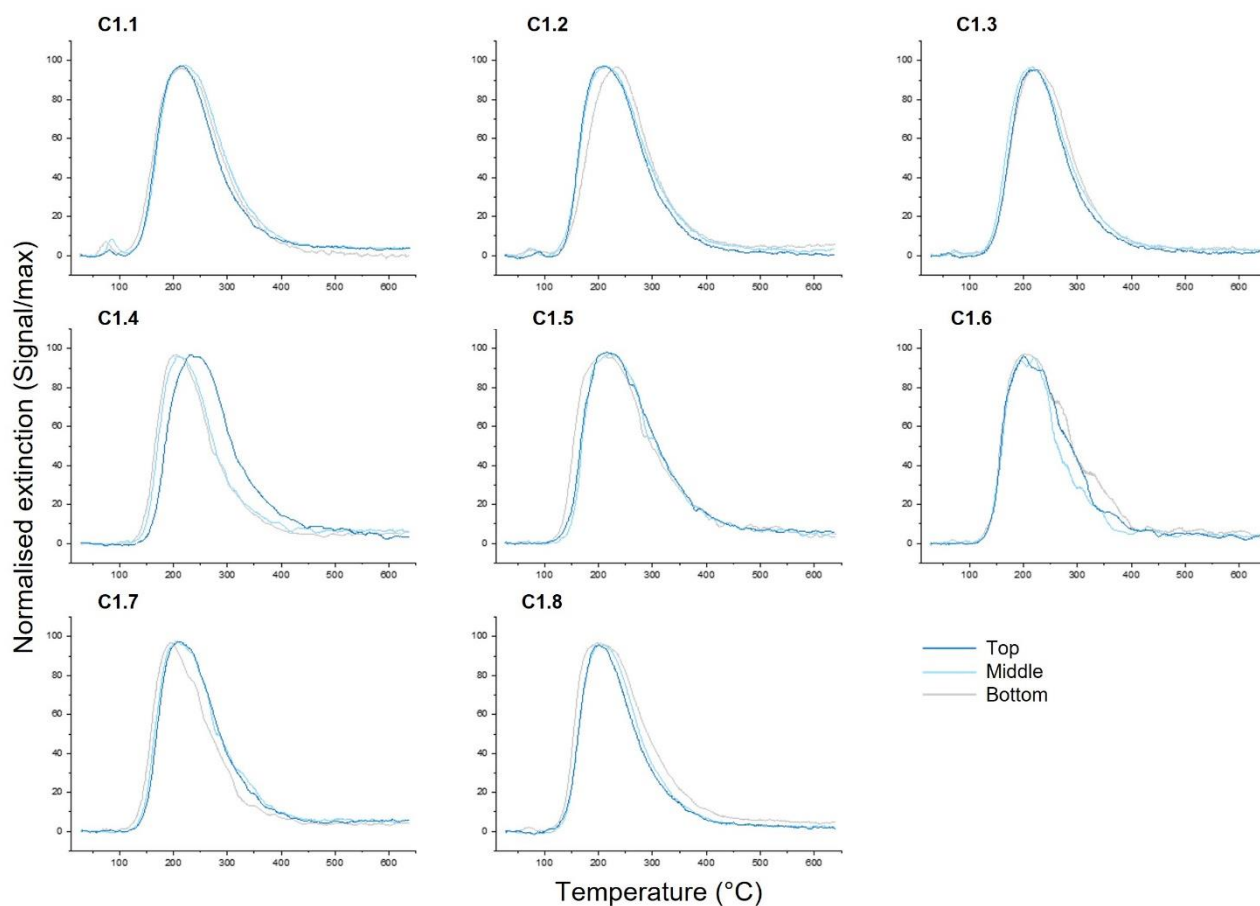

Figure S9.1: Full PTD curves for  $\approx 0.1$  g of solid-phase materials from EXP1

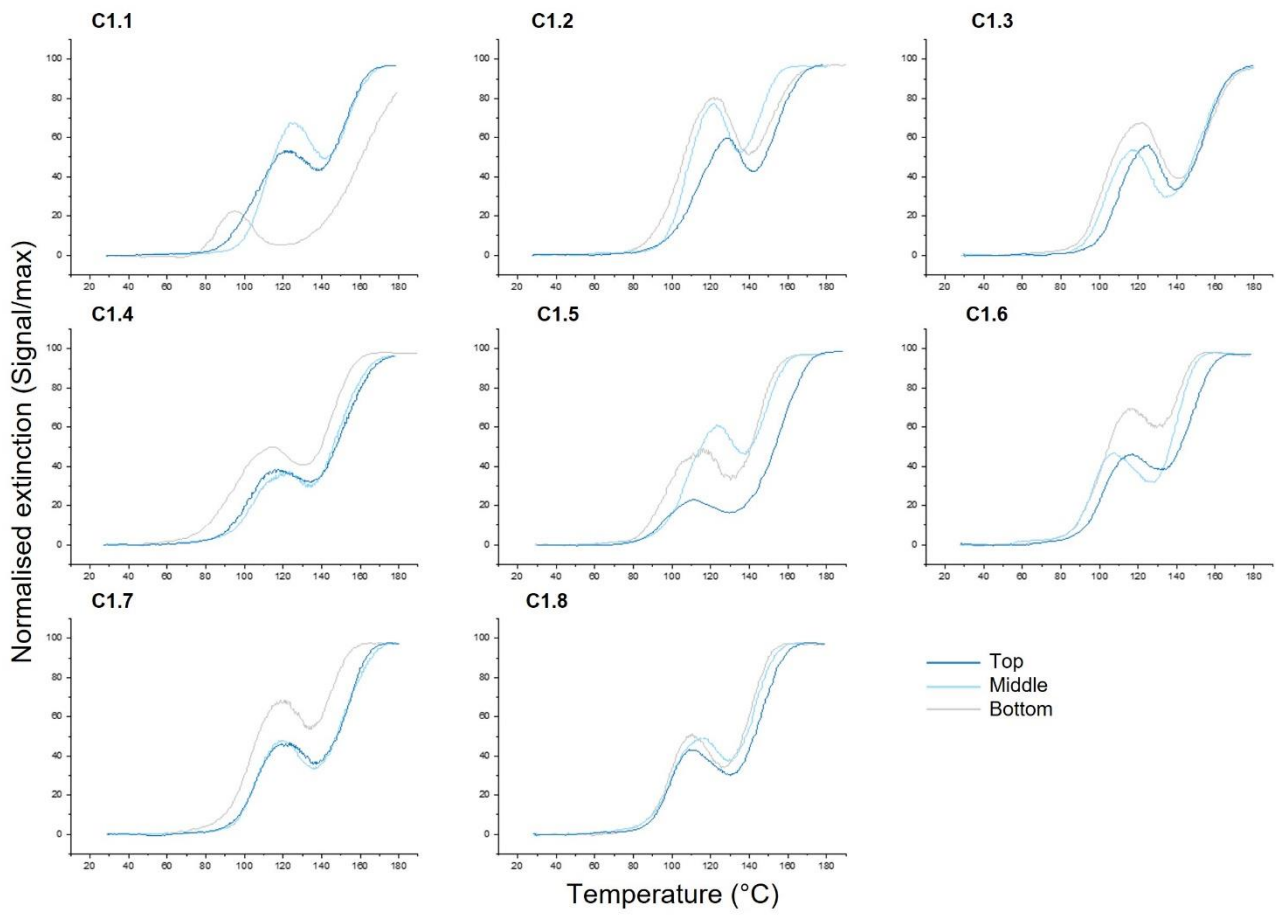

Figure S9.2: PTD curves up to 180°C for  $\approx 2.0$  g of solid-phase materials from EXP1 to assess the presence of Hg(0) produced during the experiments.

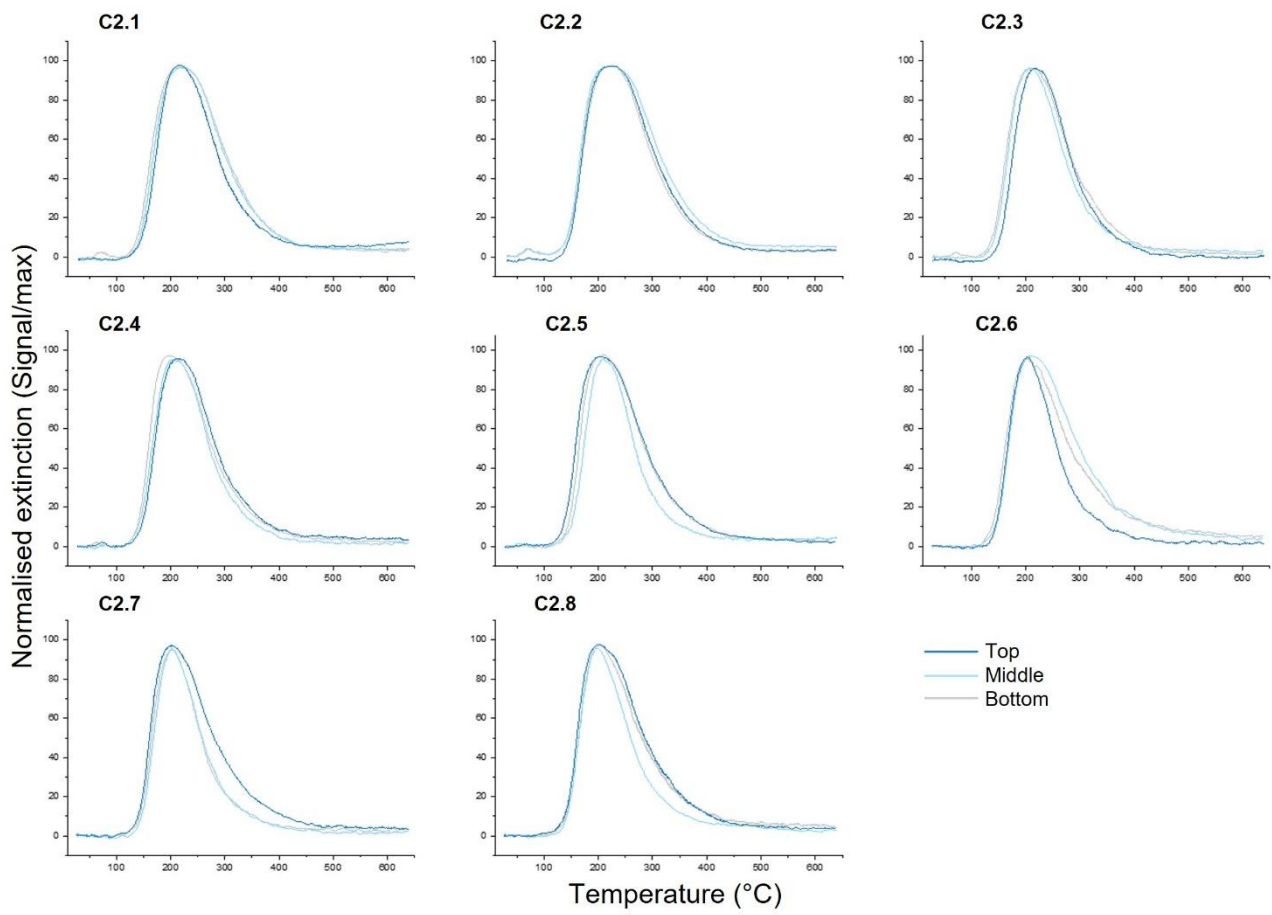

Figure S9.3: Full PTD curves for  $\approx 0.1$  g of solid-phase materials from EXP2

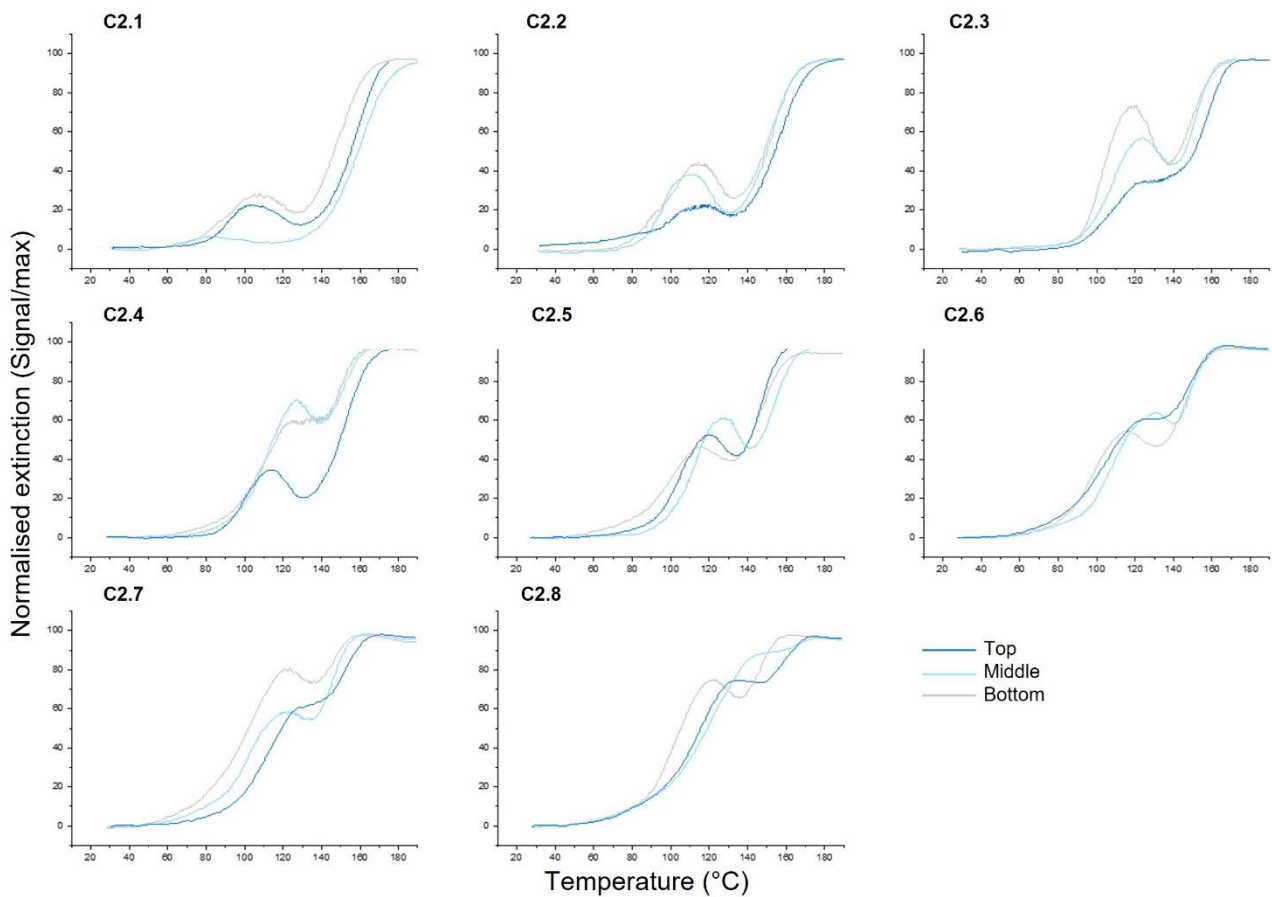

Figure S9.4: PTD curves up to 180°C for  $\approx 2.0$  g of solid-phase materials from EXP2 to assess the presence of Hg(0) produced during the experiments.

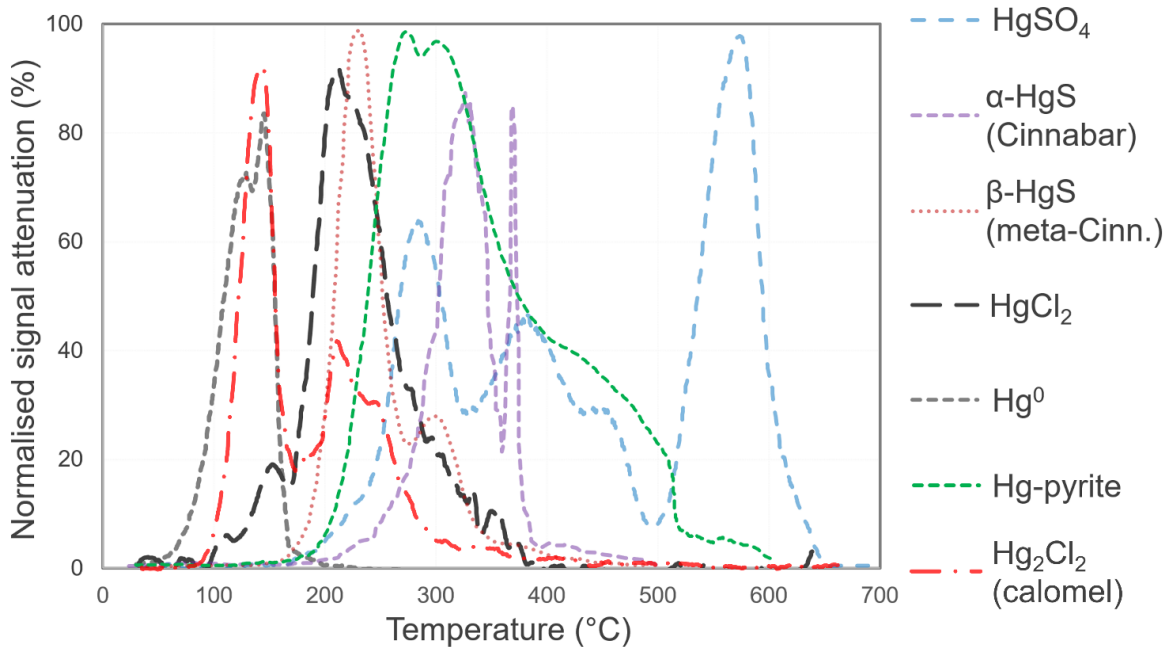

Figure S9.5: Mean (between 2 and 10 replications), normalised PTD release curves of standards for Hg species. All standards were prepared in silica ( $\text{SiO}_2$ ) matrix. Species are below 100% normalised maximum attenuation due to variability in signal of replicates (from McLagan et al., 2022). As discussed in McLagan et al. (2022), calomel is highly unstable in the environment and the conditions of these experiments; and hence peaks  $< 175^\circ\text{C}$  are attributed to Hg(0).

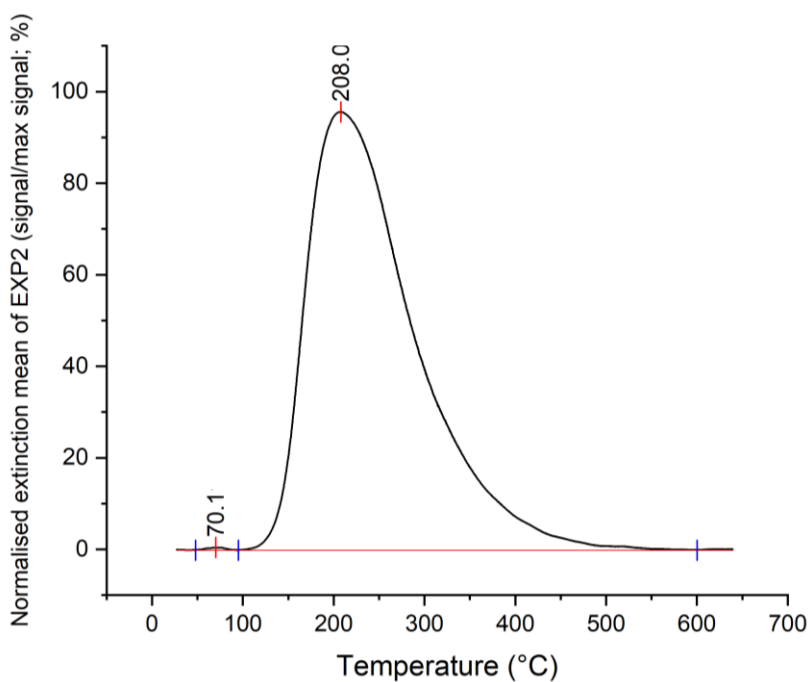

Figure S9.6: Mean PTD curve for all columns from EXP2 with Hg(0) peak (at 70.1 °C) and Hg(II) peak (at 208.0 °C) highlighted. Peak integration data is shown Table S9.1 below. Data were integrated using OriginPro 2018.

Table S9.1: Details of Hg(0) and Hg(II) peaks from mean PTD curve for all columns in EXP2 (FigureS9.6).

|        | Centre | Height | Area     | Area% |
|--------|--------|--------|----------|-------|
| Hg(0)  | 70.12  | 0.59   | 14.68    | 0.11  |
| Hg(II) | 208.04 | 95.78  | 13238.61 | 99.89 |



## S10. Modelling estimation of liquid-phase Hg speciation using Visual MINTEQ v3.1

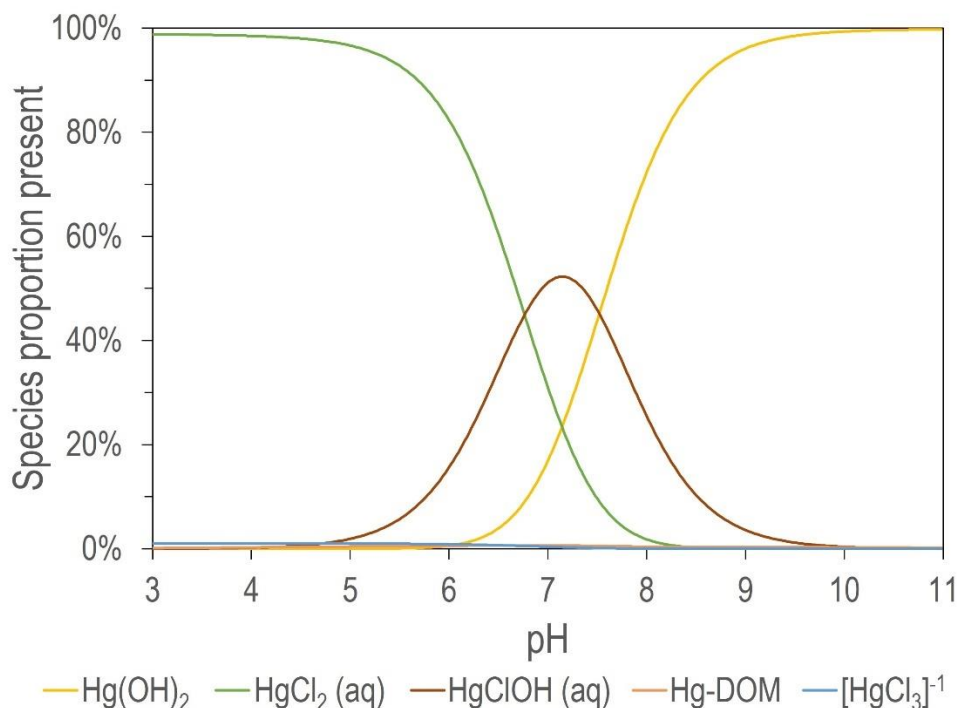

Figure S10.1: Species distribution for EXP1 ( $46.1 \pm 1.1 \text{ mg L}^{-1}$ ) calculated with Visual Minteq ver. 3.1 (Gustafsson, 2014) using equilibrium constants from the thermo.vdb database and the "Stockholm Humic Model" (Gustafsson, 2001) without any changes. The input included ICP-OES and DOC results from tap water analysis (Table S2.2) and per mole Hg(II) two moles Cl<sup>-</sup> were included to account for the addition of Hg as HgCl<sub>2</sub>. Additionally, Cl<sup>-</sup> concentration of  $36 \text{ mg L}^{-1}$  was added for tap water matrix based on published data for German tap water (Bergmann et al., 2015).

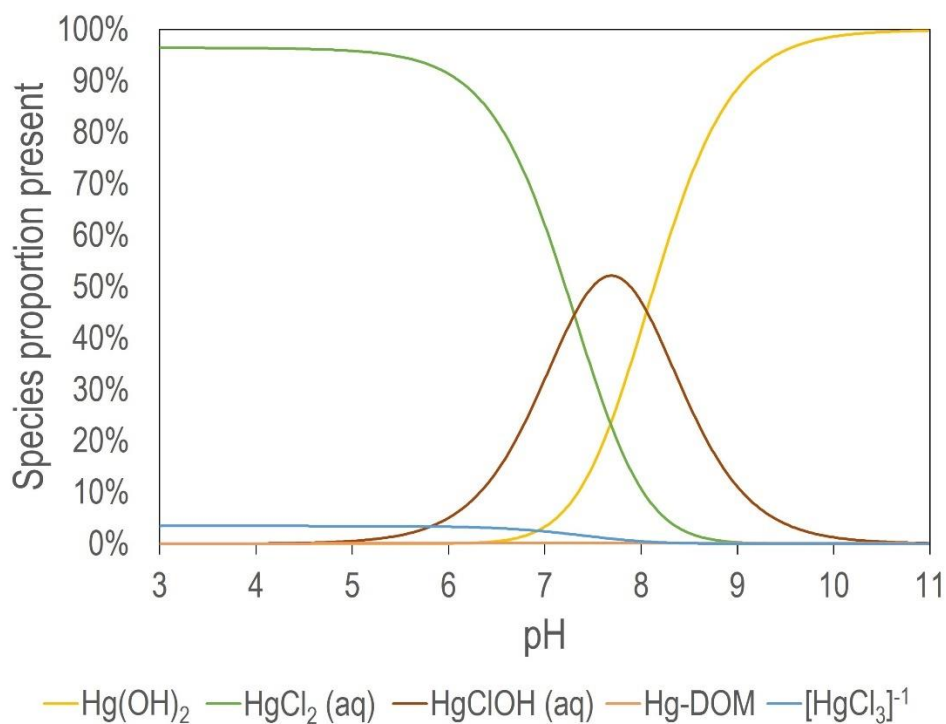

Figure S10.2: Species distribution for EXP2 ( $143.7 \pm 6.2 \text{ mg L}^{-1}$ ) calculated with Visual Minteq ver. 3.1 (Gustafsson, 2014) using equilibrium constants from the thermo.vdb database and the “Stockholm Humic Model” (Gustafsson, 2001) without any changes. The input included ICP-OES and DOC results from tap water analysis (Table S2.2) and per mole  $\text{Hg}(\text{II})$  two moles  $\text{Cl}^-$  were included to account for the addition of Hg as  $\text{HgCl}_2$ . Additionally,  $\text{Cl}^-$  concentration of  $36 \text{ mg L}^{-1}$  was added for tap water matrix based on published data for German tap water (Bergmann et al., 2015).

## References:

Bergmann, M. H., Iourtchouk, T., Schmidt, W., Hartmann, J., Fischer, M., Nüsske, G., and Gerngroß, D.: Laboratory- and technical-scale comparison of chlorate and perchlorate formation during drinking water electrolysis: a field study. *J. Appl. Electrochem.*, 45, 765-778, <https://doi.org/10.1007/s10800-015-0826-z>, 2015.

Gustafsson, J. P.: Modeling the acid–base properties and metal complexation of humic substances with the Stockholm Humic Model. *J. Colloid Interf. Sci.*, 244, 102-112, <https://doi.org/10.1006/jcis.2001.7871>, 2001.

Gustafsson, J. P.: Tutorial to Visual MINTEQ version 3.1. KTH, *Royal Institute of Technology*, Stockholm, Sweden, 2014.

McLagan, D. S., Schwab, L., Wiederhold, J. G., Chen, L., Pietrucha, J., Kraemer, S. M., and Biester, H.: Demystifying mercury geochemistry in contaminated soil–groundwater systems with complementary mercury stable isotope, concentration, and speciation analyses, *Environ. Sci. Process. Impacts*, 24, 1406-1429, <https://doi.org/10.1039/D1EM00368B>, 2022.
